# Supplementary material for: SNP Discovery and Genetic Variation of Candidate Genes Relevant to Heat Tolerance and Agronomic Traits in Natural Populations of Sand Rice (Agriophyllum squarrosum)
Source: PubMed Central journal article supplement (PMC5383723; doi:10.3389/fpls.2017.00536), 2017-04-07

Histogram of SNP\_number\_per\_unigene

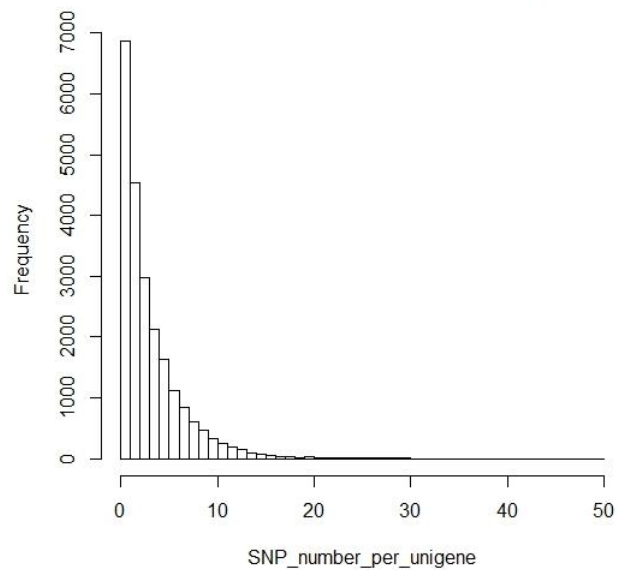

SR\_22538

Histogram of SNP\_number\_per\_unigene

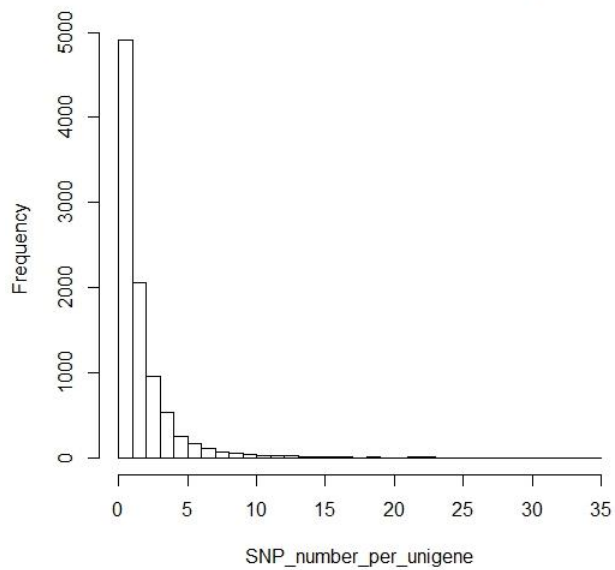

SR\_9278

Histogram of SNP\_number\_per\_unigene

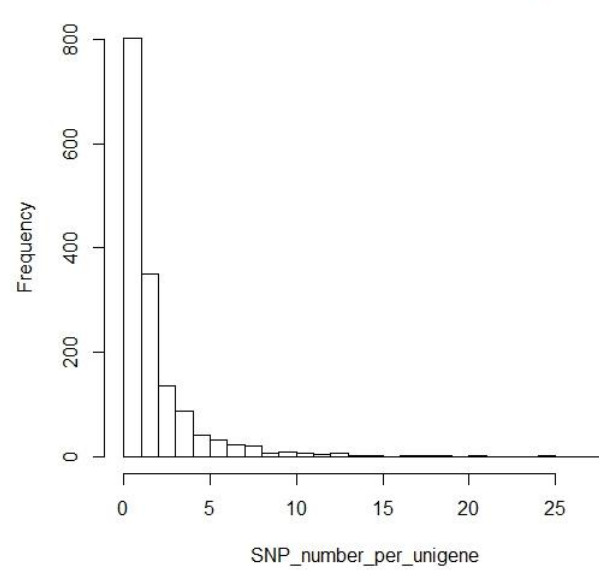

SR\_1534

Histogram of SNP\_frequency

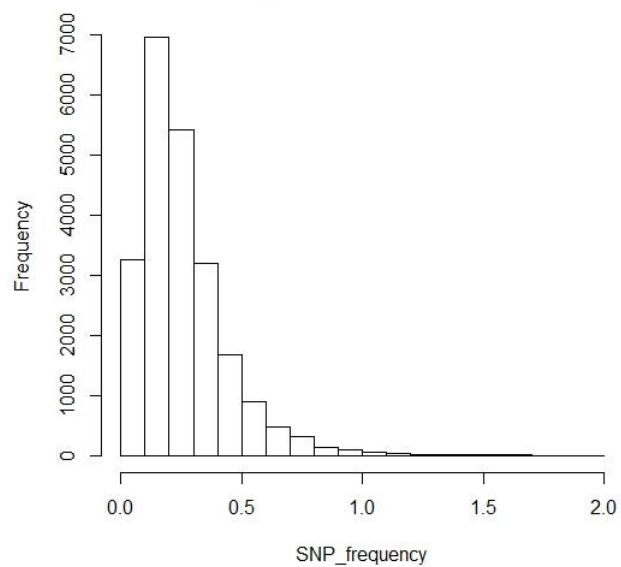

Histogram of SNP\_frequency

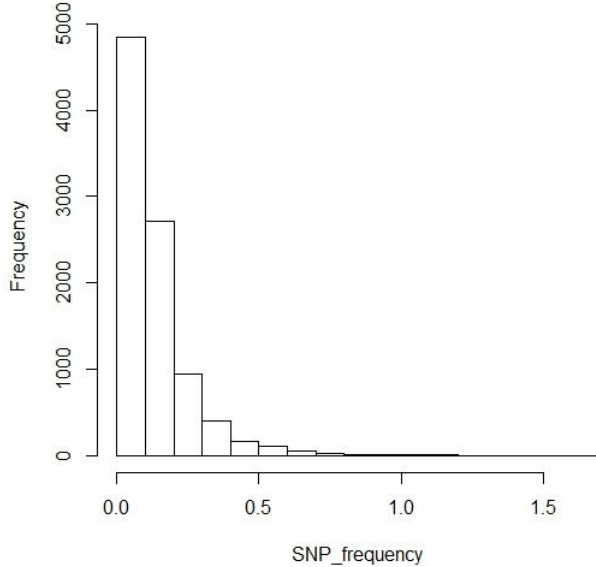

Histogram of SNP\_frequency

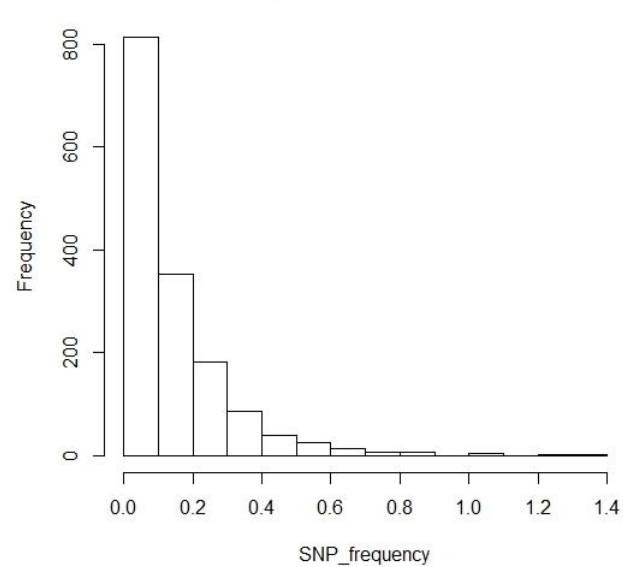

**Histogram of SNP\_number\_per\_unigene**

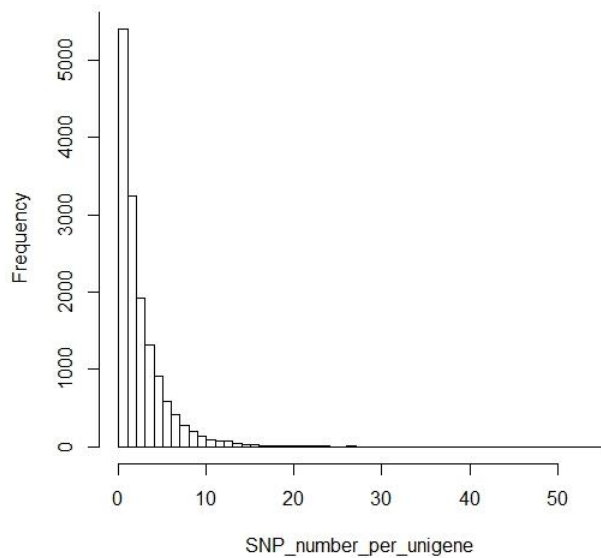

SR\_14777

**Histogram of SNP\_number\_per\_unigene**

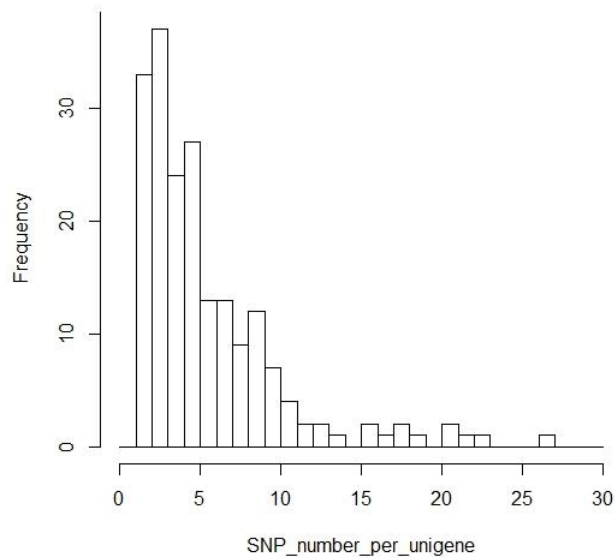

SR\_1787

**Histogram of SNP\_number\_per\_unigene**

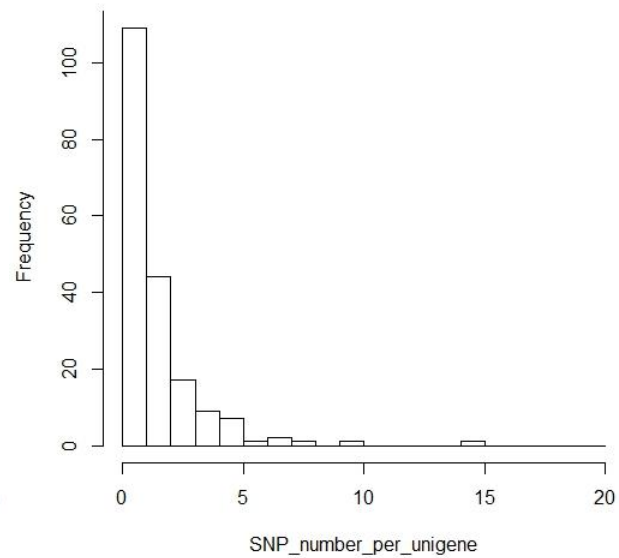

SR\_192

**Histogram of SNP\_frequency**

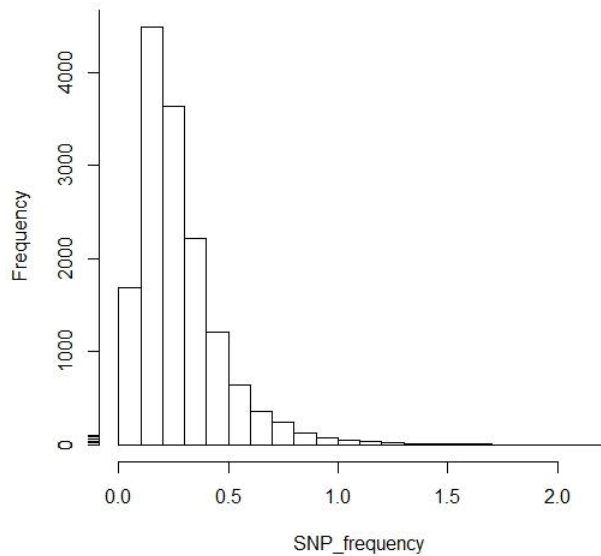

**Histogram of SNP\_frequency**

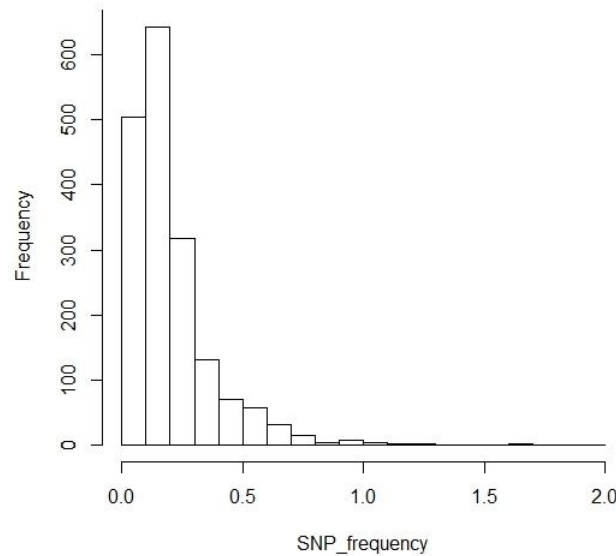

**Histogram of SNP\_frequency**

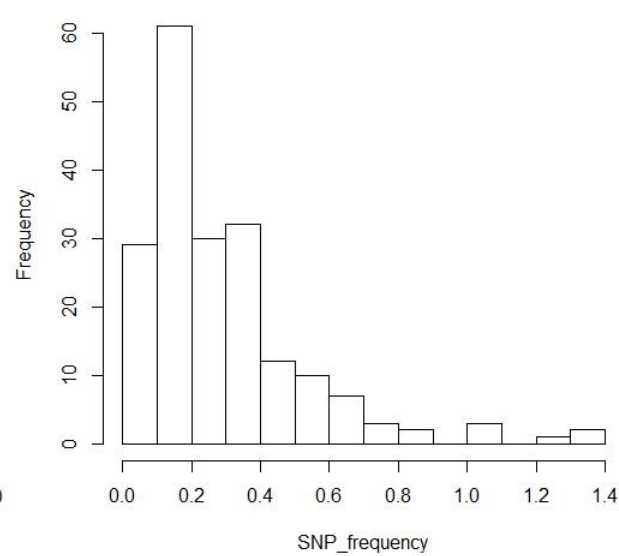

Histogram of SNP\_number\_per\_unigene

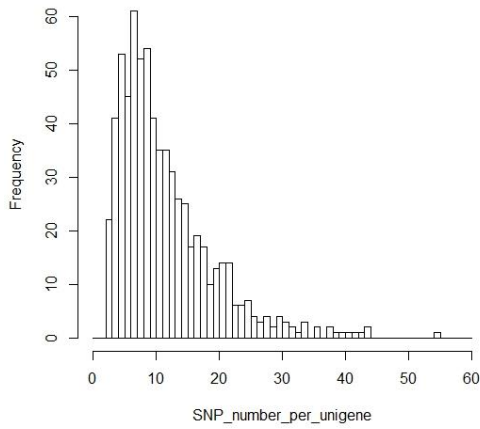

SR\_682

Histogram of SNP\_number\_per\_unigene

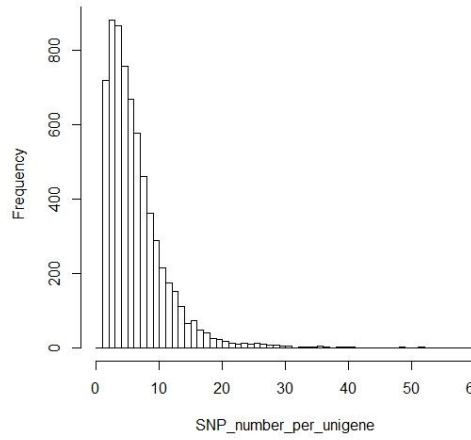

SR\_6614

Histogram of SNP\_number\_per\_unigene

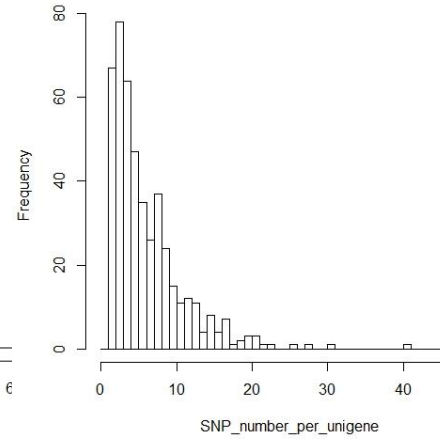

SR\_465

Histogram of SNP\_number\_per\_unigene

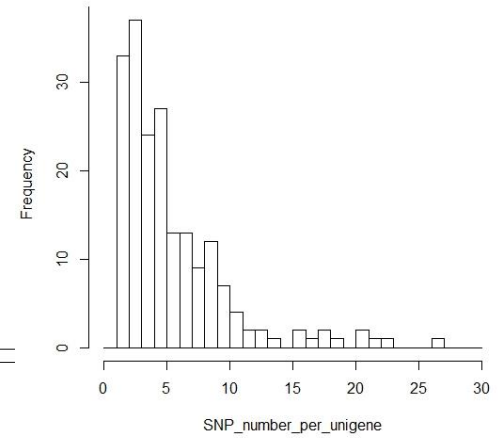

SR\_195

Histogram of SNP\_frequency

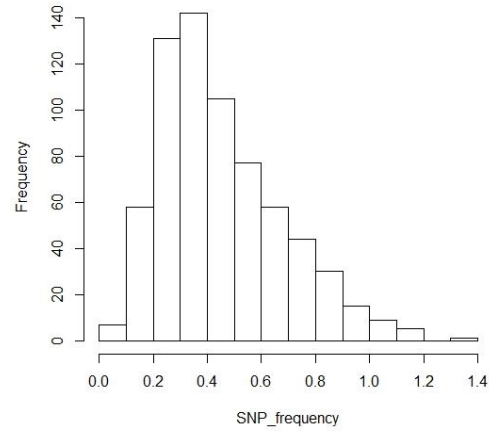

Histogram of SNP\_frequency

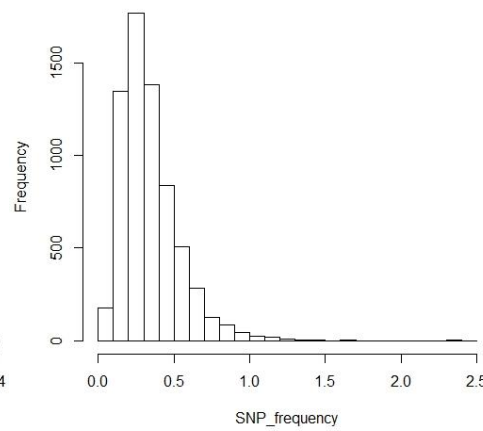

Histogram of SNP\_frequency

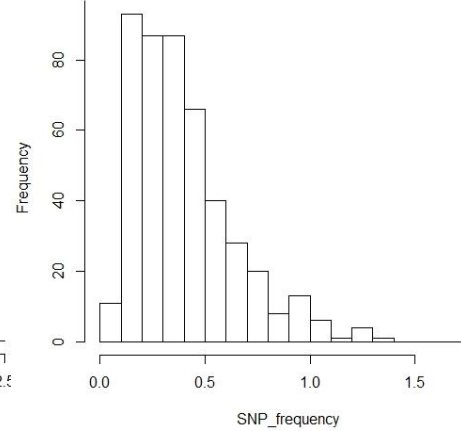

Histogram of SNP\_frequency

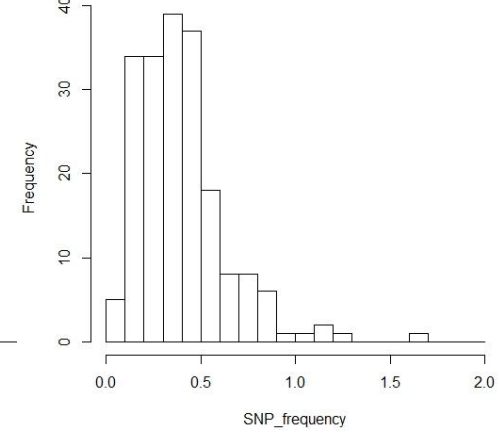

Supplement: Data_Sheet_2.pdf [file Data_Sheet_2.pdf]
