# Supplementary material for: SNP Discovery and Genetic Variation of Candidate Genes Relevant to Heat Tolerance and Agronomic Traits in Natural Populations of Sand Rice (Agriophyllum squarrosum)
Source: Front Plant Sci. 2017 Apr 7;8:536. doi: 10.3389/fpls.2017.00536 (PMC5383723; doi:10.3389/fpls.2017.00536)
Supplement: Supplementary file 3 [file Data_Sheet_3.xlsx]

## Sheet: 10512RBH
query_name	query_length	accession_number	length	E value	bit score	frame	query_start	query_end	hit_start	hit_end	positives	identical
AT1G01030	358	c44224.graph_c0	1127	3e-54	209	0	51	170	677	1033	0.908	0.808
AT1G01040	1909	c48585.graph_c0	7082	0	2564	0	312	1909	1744	6627	0.843	0.753
AT1G01090	428	c45655.graph_c0	2063	0	684	0	75	428	581	1642	0.958	0.912
AT1G01120	528	c28035.graph_c0	2235	0	745	0	2	526	274	1854	0.816	0.683
AT1G01140	447	c45845.graph_c0	1989	0	647	0	7	446	274	1599	0.822	0.704
AT1G01170	83	c49917.graph_c0	1354	3e-28	120	0	8	80	946	1164	0.877	0.712
AT1G01180	307	c36104.graph_c0	1670	1e-100	360	0	18	301	320	1201	0.732	0.593
AT1G01220	1055	c47708.graph_c0	3903	0	1436	0	4	1053	447	3719	0.781	0.662
AT1G01225	260	c28215.graph_c0	1447	3e-95	345	0	1	235	403	1113	0.844	0.747
AT1G01230	157	c37396.graph_c0	1478	2e-75	278	0	1	156	300	767	0.923	0.827
AT1G01250	192	c39915.graph_c0	947	9e-38	153	0	41	163	206	592	0.674	0.605
AT1G01260	590	c46538.graph_c0	3209	3e-88	323	0	4	243	771	1490	0.773	0.632
AT1G01280	510	c34978.graph_c0	1777	0	751	0	2	509	143	1672	0.82	0.711
AT1G01290	270	c47744.graph_c0	1334	1e-69	259	0	5	269	353	1051	0.664	0.543
AT1G01300	485	c47471.graph_c0	2569	1e-156	548	0	72	484	587	1837	0.754	0.646
AT1G01350	343	c48868.graph_c0	2067	1e-117	419	0	26	336	479	1414	0.752	0.644
AT1G01360	187	c21079.graph_c0	1088	1e-74	275	0	15	182	351	851	0.905	0.762
AT1G01370	178	c38746.graph_c0	967	2e-29	125	0	74	178	416	727	0.695	0.571
AT1G01430	456	c35571.graph_c0	1980	1e-131	466	0	20	448	207	1475	0.668	0.541
AT1G01490	177	c23678.graph_c0	1243	9e-28	120	0	1	68	673	876	0.956	0.868
AT1G01500	327	c45842.graph_c0	1937	9e-79	290	0	42	319	672	1442	0.689	0.557
AT1G01510	636	c47931.graph_c0	2602	0	782	0	5	636	432	2318	0.751	0.642
AT1G01580	725	c31651.graph_c0	2404	0	686	0	36	725	301	2343	0.691	0.519
AT1G01610	503	c37366.graph_c0	1962	0	754	0	5	500	239	1732	0.841	0.731
AT1G01630	255	c39566.graph_c0	1210	2e-94	342	0	22	255	173	880	0.78	0.669
AT1G01650	540	c42738.graph_c0	2013	0	573	0	179	536	737	1810	0.866	0.763
AT1G01690	449	c59478.graph_c0	319	1e-07	55.1	0	54	129	3	227	0.645	0.355
AT1G01710	427	c40332.graph_c0	3124	1e-104	376	0	169	426	411	1184	0.791	0.682
AT1G01720	289	c44292.graph_c0	3353	1e-71	267	0	5	159	2753	3223	0.879	0.822
AT1G01760	420	c47687.graph_c0	3207	2e-62	236	0	196	360	1030	1524	0.836	0.673
AT1G01770	632	c48338.graph_c0	3509	1e-114	410	0	79	364	1354	2202	0.832	0.699
AT1G01800	260	c48301.graph_c0	1304	2e-64	243	0	68	260	488	1069	0.814	0.567
AT1G01820	235	c25797.graph_c0	1397	1e-114	407	0	1	233	274	972	0.91	0.824
AT1G01840	152	c39929.graph_c0	937	3e-15	78.2	0	6	152	260	718	0.561	0.439
AT1G01860	343	c45323.graph_c0	1606	1e-86	317	0	77	286	580	1209	0.852	0.71
AT1G01880	599	c49571.graph_c0	3879	1e-174	608	0	1	598	1835	3661	0.675	0.519
AT1G01900	774	c46695.graph_c0	2863	0	798	0	38	774	291	2555	0.672	0.538
AT1G01910	303	c21347.graph_c0	1772	1e-137	486	0	2	300	301	1194	0.89	0.779
AT1G01920	547	c47132.graph_c1	4013	0	663	0	1	529	146	1693	0.749	0.613
AT1G01930	580	c49420.graph_c2	2249	1e-149	524	0	18	494	150	1667	0.707	0.541
AT1G01940	160	c24221.graph_c0	950	2e-81	298	0	1	160	304	783	0.925	0.875
AT1G01970	409	c38286.graph_c0	2020	1e-128	456	0	25	405	748	1899	0.743	0.579
AT1G02020	642	c47194.graph_c0	1433	1e-132	379	0	152	480	2	985	0.69	0.594
AT1G02040	324	c51392.graph_c0	1797	3e-27	119	0	70	282	483	1313	0.412	0.341
AT1G02050	395	c50015.graph_c0	1527	1e-150	528	0	13	392	205	1341	0.756	0.698
AT1G02065	333	c44483.graph_c0	1323	2e-58	223	0	102	261	713	1207	0.757	0.704
AT1G02070	131	c33860.graph_c1	352	2e-11	65.1	0	2	36	45	149	0.857	0.771
AT1G02080	2431	c48123.graph_c0	8969	0	2505	0	57	2431	1463	8764	0.672	0.533
AT1G02090	260	c38057.graph_c0	1503	1e-96	315	0	1	206	212	826	0.874	0.733
AT1G02120	598	c47428.graph_c0	2755	1e-145	512	0	60	597	361	2121	0.605	0.469
AT1G02130	203	c26327.graph_c0	1079	1e-103	370	0	1	202	322	927	0.931	0.851
AT1G02140	150	c21241.graph_c0	893	1e-74	275	0	1	150	118	570	0.934	0.874
AT1G02145	493	c48195.graph_c0	1664	2e-53	146	0	332	436	787	1098	0.771	0.638
AT1G02150	524	c36818.graph_c0	2155	1e-175	613	0	29	498	204	1625	0.774	0.605
AT1G02160	71	c41272.graph_c0	628	3e-21	97.1	0	1	71	144	356	0.789	0.662
AT1G02170	367	c43192.graph_c0	1952	1e-155	543	0	14	367	226	1296	0.804	0.735
AT1G02180	226	c38146.graph_c0	1593	2e-58	222	0	28	200	876	1394	0.751	0.595
AT1G02205	461	c45812.graph_c0	2554	1e-166	580	0	9	457	842	2179	0.784	0.607
AT1G02260	502	c48269.graph_c0	2723	0	646	0	1	502	787	2379	0.732	0.613
AT1G02305	362	c40108.graph_c0	1870	1e-147	520	0	31	362	426	1421	0.825	0.717
AT1G02330	279	c46920.graph_c0	1539	7e-81	297	0	1	279	324	1112	0.688	0.591
AT1G02370	537	c40261.graph_c0	1882	5e-94	342	0	58	537	155	1594	0.583	0.397
AT1G02390	530	c41080.graph_c0	1762	1e-151	532	0	7	527	60	1664	0.685	0.53
AT1G02400	329	c39125.graph_c0	1486	1e-87	320	0	1	327	131	1117	0.641	0.507
AT1G02410	287	c44690.graph_c0	1562	1e-95	346	0	70	265	561	1151	0.904	0.832
AT1G02420	491	c42517.graph_c0	2581	1e-173	606	0	11	489	1122	2546	0.762	0.616
AT1G02460	491	c31281.graph_c0	1769	1e-172	602	0	87	488	348	1553	0.842	0.696
AT1G02475	219	c46107.graph_c0	2247	2e-36	149	0	74	163	483	851	0.675	0.593
AT1G02560	298	c20922.graph_c0	1665	1e-132	467	0	1	295	161	1039	0.832	0.798
AT1G02610	221	c26107.graph_c0	913	8e-45	177	0	1	191	291	857	0.662	0.444
AT1G02630	389	c37876.graph_c0	1431	1e-130	461	0	14	389	106	1278	0.762	0.57
AT1G02640	768	c40699.graph_c0	2795	0	1149	0	12	768	429	2711	0.817	0.718
AT1G02660	713	c46110.graph_c1	2414	1e-179	626	0	171	711	339	2030	0.708	0.569
AT1G02680	126	c41002.graph_c0	1151	6e-43	169	0	20	125	536	856	0.888	0.766
AT1G02700	247	c38897.graph_c0	1421	6e-31	131	0	77	247	360	824	0.655	0.494
AT1G02780	214	c49841.graph_c0	1217	4e-83	304	0	1	184	498	1049	0.891	0.826
AT1G02790	422	c21504.graph_c0	1670	2e-97	353	0	51	414	319	1455	0.636	0.478
AT1G02800	501	c44261.graph_c0	1816	1e-179	625	0	43	499	152	1528	0.782	0.634
AT1G02816	166	c50095.graph_c0	1045	1e-45	179	0	27	150	359	730	0.782	0.669
AT1G02840	303	c47342.graph_c0	1706	5e-74	275	0	1	195	154	708	0.779	0.697
AT1G02850	497	c45453.graph_c0	1715	1e-157	551	0	26	487	207	1598	0.722	0.562
AT1G02860	335	c38279.graph_c0	1660	1e-121	431	0	1	335	351	1316	0.754	0.623
AT1G02870	193	c34633.graph_c0	1089	2e-70	262	0	1	193	158	736	0.772	0.632
AT1G02960	471	c46435.graph_c0	2590	2e-20	97.8	0	312	450	1263	1667	0.607	0.371
AT1G03000	941	c47981.graph_c0	3788	0	584	0	306	783	1229	2644	0.739	0.611
AT1G03010	634	c43347.graph_c0	2588	0	839	0	1	593	337	2112	0.812	0.686
AT1G03020	102	c32741.graph_c0	845	2e-38	154	0	1	102	111	416	0.843	0.706
AT1G03030	301	c42760.graph_c3	1305	1e-100	363	0	1	301	180	1172	0.685	0.568
AT1G03050	599	c50516.graph_c0	2416	1e-164	574	0	3	592	285	2042	0.641	0.512
AT1G03055	264	c35393.graph_c1	1282	2e-58	223	0	57	263	332	946	0.686	0.502
AT1G03060	3601	c49194.graph_c0	11785	0	3159	0	1331	3579	4413	11165	0.795	0.686
AT1G03070	247	c50068.graph_c0	1182	1e-101	365	0	4	247	244	963	0.836	0.721
AT1G03080	1733	c35510.graph_c0	5978	0	1061	0	12	1729	345	5660	0.563	0.387
AT1G03090	734	c35721.graph_c0	2693	0	1048	0	1	733	391	2619	0.823	0.702
AT1G03100	793	c46992.graph_c0	3853	0	961	0	52	792	1497	3704	0.775	0.637
AT1G03110	427	c44254.graph_c0	1839	2e-97	353	0	88	415	631	1614	0.686	0.533
AT1G03140	420	c37582.graph_c0	1946	1e-128	454	0	100	419	533	1480	0.814	0.696
AT1G03150	174	c35186.graph_c0	1192	1e-97	352	0	1	174	162	683	0.977	0.937
AT1G03160	740	c44250.graph_c0	3438	0	434	0	353	697	1332	2354	0.804	0.614
AT1G03170	240	c34536.graph_c0	1371	1e-22	103	0	16	169	533	988	0.605	0.395
AT1G03190	758	c47926.graph_c0	5194	0	1373	0	1	749	687	2933	0.935	0.852
AT1G03220	433	c36434.graph_c0	1700	1e-137	484	0	26	432	365	1588	0.754	0.616
AT1G03250	245	c41023.graph_c0	1505	3e-73	271	0	1	245	588	1334	0.736	0.58
AT1G03260	274	c43059.graph_c0	1517	8e-77	191	0	30	174	271	705	0.738	0.655
AT1G03290	571	c35180.graph_c0	2174	2e-58	224	0	268	497	994	1683	0.643	0.522
AT1G03310	882	c38735.graph_c1	3170	0	866	0	80	877	253	2610	0.701	0.523
AT1G03350	470	c45337.graph_c0	852	2e-48	190	0	49	244	94	717	0.639	0.495
AT1G03360	322	c38606.graph_c0	1336	1e-114	408	0	3	318	99	1049	0.781	0.614
AT1G03390	461	c21308.graph_c0	1709	1e-174	608	0	1	459	306	1667	0.776	0.623
AT1G03440	397	c42146.graph_c0	904	2e-83	306	0	5	224	256	903	0.818	0.677
AT1G03470	269	c43021.graph_c0	1669	1e-42	170	0	5	217	141	800	0.63	0.454
AT1G03475	386	c44195.graph_c0	1656	1e-175	612	0	2	386	337	1512	0.814	0.734
AT1G03510	429	c13392.graph_c0	1655	1e-143	504	0	7	424	78	1337	0.717	0.588
AT1G03530	801	c47442.graph_c0	3945	4e-63	240	0	352	512	1087	1569	0.814	0.708
AT1G03540	609	c33393.graph_c0	2533	0	668	0	31	607	625	2355	0.734	0.551
AT1G03600	174	c25944.graph_c0	1472	5e-46	180	0	68	174	547	867	0.907	0.776
AT1G03620	265	c43814.graph_c0	1491	1e-102	369	0	28	265	400	1119	0.855	0.714
AT1G03650	158	c49443.graph_c2	1019	1e-58	222	0	3	154	422	877	0.836	0.678
AT1G03687	309	c48295.graph_c0	3717	4e-06	49.7	0	280	309	889	978	0.9	0.667
AT1G03730	167	c39536.graph_c0	1232	2e-32	135	0	14	166	387	857	0.592	0.478
AT1G03750	862	c47092.graph_c0	2199	0	1012	0	99	779	119	2197	0.833	0.709
AT1G03760	391	c40201.graph_c0	811	5e-45	174	0	1	142	64	495	0.757	0.576
AT1G03780	758	c49092.graph_c0	2677	0	568	0	16	596	196	1980	0.666	0.53
AT1G03790	393	c21820.graph_c0	1294	7e-57	218	0	83	279	285	923	0.633	0.532
AT1G03840	506	c43642.graph_c0	2191	1e-103	373	0	34	229	252	845	0.924	0.879
AT1G03870	247	c37504.graph_c0	1076	1e-54	210	0	38	224	244	801	0.721	0.595
AT1G03900	272	c41941.graph_c1	1516	1e-89	327	0	11	252	325	1074	0.761	0.693
AT1G03905	290	c43793.graph_c0	1571	1e-116	414	0	4	290	171	1037	0.779	0.699
AT1G03910	672	c46521.graph_c1	2346	0	717	0	90	672	322	2040	0.729	0.613
AT1G03920	569	c45102.graph_c0	2487	0	856	0	1	525	576	2102	0.853	0.771
AT1G03940	469	c28171.graph_c0	960	1e-27	121	0	180	467	3	887	0.49	0.293
AT1G03950	210	c37402.graph_c0	1320	6e-84	306	0	1	210	412	1041	0.833	0.719
AT1G04010	633	c43380.graph_c0	2514	0	534	0	85	415	1196	2200	0.851	0.741
AT1G04020	714	c44176.graph_c0	2264	1e-100	362	0	333	713	227	1357	0.643	0.473
AT1G04030	434	c45549.graph_c0	2415	2e-32	137	0	206	430	455	1150	0.522	0.387
AT1G04080	823	c46900.graph_c1	3304	1e-113	407	0	435	724	1719	2582	0.814	0.672
AT1G04110	775	c36686.graph_c0	2791	0	731	0	271	771	1	1494	0.838	0.685
AT1G04120	1514	c48540.graph_c1	7071	0	2132	0	14	1505	734	5218	0.804	0.702
AT1G04130	360	c44337.graph_c0	2942	8e-92	334	0	1	238	2086	2799	0.828	0.647
AT1G04140	790	c28009.graph_c0	3546	0	756	0	1	790	789	3092	0.637	0.518
AT1G04170	465	c37480.graph_c0	2093	0	876	0	1	465	323	1714	0.961	0.897
AT1G04190	328	c34547.graph_c0	1871	1e-144	509	0	5	323	278	1234	0.865	0.749
AT1G04200	732	c46407.graph_c0	2612	0	884	0	1	701	297	2375	0.778	0.643
AT1G04210	1112	c43243.graph_c0	3822	0	983	0	43	1108	162	3512	0.632	0.489
AT1G04230	325	c21239.graph_c0	1597	6e-54	208	0	1	269	555	1349	0.636	0.533
AT1G04280	534	c50227.graph_c0	1888	1e-176	615	0	59	528	238	1656	0.761	0.641
AT1G04300	1074	c40621.graph_c0	4050	1e-173	606	0	1	415	2577	3821	0.81	0.702
AT1G04390	849	c47262.graph_c0	5432	2e-60	231	0	379	707	1861	2859	0.571	0.374
AT1G04400	612	c42470.graph_c0	2669	0	758	0	1	516	769	2289	0.82	0.676
AT1G04410	332	c36991.graph_c0	1737	1e-172	602	0	1	332	236	1231	0.925	0.867
AT1G04420	412	c42390.graph_c0	1789	1e-166	580	0	25	410	189	1367	0.822	0.697
AT1G04510	523	c37560.graph_c0	2395	0	786	0	1	517	591	2156	0.847	0.735
AT1G04520	307	c28161.graph_c0	1713	3e-78	289	0	25	299	336	1130	0.681	0.558
AT1G04530	310	c28314.graph_c0	1482	3e-35	146	0	1	308	321	1325	0.471	0.326
AT1G04555	152	c30726.graph_c0	1048	2e-38	154	0	5	138	211	609	0.746	0.604
AT1G04560	186	c33320.graph_c0	951	5e-60	227	0	4	161	97	570	0.778	0.671
AT1G04570	542	c47395.graph_c1	2902	1e-139	493	0	85	542	629	2011	0.682	0.539
AT1G04590	381	c49189.graph_c0	1812	2e-74	276	0	130	319	622	1191	0.842	0.658
AT1G04620	462	c49670.graph_c1	1214	1e-175	332	0	35	215	501	1043	0.939	0.834
AT1G04640	235	c27938.graph_c0	1435	2e-98	355	0	5	220	77	724	0.866	0.773
AT1G04650	997	c38261.graph_c0	2437	1e-113	408	0	425	992	639	2381	0.575	0.387
AT1G04680	431	c36339.graph_c1	1731	1e-172	601	0	41	429	298	1452	0.823	0.746
AT1G04690	328	c33449.graph_c0	1943	1e-174	607	0	1	328	288	1271	0.951	0.851
AT1G04730	943	c47776.graph_c0	3179	0	879	0	134	943	422	2947	0.699	0.545
AT1G04780	664	c45253.graph_c0	3069	0	793	0	6	642	454	2343	0.759	0.637
AT1G04790	634	c47748.graph_c0	2618	1e-36	152	0	510	633	1124	1495	0.664	0.584
AT1G04850	413	c45331.graph_c0	1812	1e-145	511	0	1	413	348	1568	0.727	0.616
AT1G04860	961	c41105.graph_c0	3670	1e-118	425	0	45	748	1032	3230	0.519	0.38
AT1G04870	383	c41402.graph_c0	1982	1e-156	550	0	26	383	710	1783	0.846	0.698
AT1G04880	448	c38771.graph_c0	1888	3e-49	193	0	178	361	1269	1796	0.668	0.538
AT1G04910	519	c45193.graph_c0	2215	0	789	0	56	519	361	1755	0.892	0.787
AT1G04940	274	c25619.graph_c0	1323	1e-103	372	0	1	274	180	995	0.763	0.682
AT1G04950	549	c46230.graph_c0	2838	0	634	0	1	549	1025	2644	0.716	0.593
AT1G04970	349	c47237.graph_c0	2194	1e-112	403	0	1	349	480	1592	0.707	0.535
AT1G04980	447	c47077.graph_c0	1683	0	655	0	15	436	288	1523	0.853	0.746
AT1G04985	193	c21692.graph_c0	1018	1e-47	186	0	1	191	117	683	0.675	0.515
AT1G04990	404	c42356.graph_c0	1965	2e-77	286	0	5	400	287	1519	0.545	0.417
AT1G05000	247	c43841.graph_c0	1397	1e-77	286	0	53	247	131	745	0.796	0.665
AT1G05010	323	c25782.graph_c0	1441	1e-139	491	0	1	323	124	1077	0.848	0.712
AT1G05030	524	c48508.graph_c0	2149	0	461	0	198	520	373	1440	0.782	0.641
AT1G05055	421	c41762.graph_c0	1786	1e-173	603	0	28	417	462	1628	0.831	0.738
AT1G05060	253	c33751.graph_c0	1224	2e-72	269	0	1	252	181	942	0.7	0.576
AT1G05070	184	c28135.graph_c0	1181	3e-44	175	0	18	182	434	976	0.575	0.497
AT1G05120	833	c48575.graph_c1	2669	1e-149	525	0	346	810	776	2149	0.715	0.547
AT1G05150	808	c43816.graph_c0	3074	0	1172	0	1	808	286	2688	0.825	0.711
AT1G05170	404	c42980.graph_c0	1765	1e-176	615	0	1	404	158	1354	0.827	0.711
AT1G05180	540	c34361.graph_c0	2524	0	870	0	16	536	610	2169	0.893	0.774
AT1G05190	223	c37150.graph_c0	1089	3e-89	324	0	12	214	191	796	0.882	0.759
AT1G05205	91	c45651.graph_c0	938	2e-33	137	0	7	86	329	571	0.889	0.815
AT1G05260	326	c42195.graph_c0	1493	1e-123	439	0	1	325	202	1188	0.796	0.62
AT1G05270	371	c37877.graph_c0	1893	1e-119	427	0	81	371	552	1421	0.863	0.663
AT1G05310	393	c38653.graph_c0	1746	5e-87	318	0	187	389	276	884	0.847	0.69
AT1G05350	431	c31051.graph_c0	1976	1e-161	566	0	1	369	666	1775	0.828	0.742
AT1G05370	417	c38740.graph_c0	1694	1e-125	445	0	10	417	136	1419	0.676	0.546
AT1G05385	199	c50396.graph_c0	1016	6e-52	200	0	30	199	278	787	0.742	0.635
AT1G05420	226	c34521.graph_c0	812	1e-15	80.1	0	105	220	423	788	0.524	0.419
AT1G05430	269	c27531.graph_c0	1140	5e-19	92	0	1	231	107	775	0.464	0.309
AT1G05440	384	c26409.graph_c0	1288	6e-63	238	0	37	384	169	1185	0.547	0.393
AT1G05460	1002	c37472.graph_c0	4012	0	1066	0	1	1002	694	3681	0.697	0.54
AT1G05500	560	c38050.graph_c0	2341	0	792	0	23	559	250	1869	0.862	0.721
AT1G05510	241	c50584.graph_c0	1053	2e-97	352	0	13	241	233	928	0.806	0.707
AT1G05590	580	c50136.graph_c0	2340	0	727	0	31	576	170	1879	0.757	0.619
AT1G05600	504	c49175.graph_c0	3495	1e-162	568	0	3	499	1811	3307	0.731	0.545
AT1G05620	322	c47469.graph_c0	1807	1e-145	511	0	1	322	474	1445	0.87	0.765
AT1G05670	741	c37463.graph_c0	3318	0	804	0	38	733	333	2420	0.73	0.562
AT1G05675	453	c47268.graph_c1	2514	1e-124	441	0	3	450	770	2131	0.664	0.472
AT1G05690	364	c37997.graph_c0	2688	1e-106	381	0	7	361	319	1383	0.672	0.522
AT1G05710	149	c39676.graph_c0	1254	4e-42	167	0	10	140	426	830	0.743	0.625
AT1G05730	149	c36293.graph_c0	866	1e-56	215	0	1	149	75	521	0.839	0.651
AT1G05750	500	c46625.graph_c1	1280	1e-117	418	0	164	492	295	1278	0.781	0.605
AT1G05760	174	c30015.graph_c0	933	6e-18	87.4	0	2	170	330	797	0.526	0.37
AT1G05790	516	c43888.graph_c0	2909	1e-149	526	0	4	505	431	2062	0.657	0.527
AT1G05830	1083	c45348.graph_c0	2976	0	711	0	590	1080	567	2060	0.8	0.69
AT1G05840	485	c46834.graph_c0	2859	1e-165	580	0	31	463	1269	2567	0.786	0.638
AT1G05850	321	c26078.graph_c0	1636	1e-130	462	0	41	310	412	1221	0.885	0.774
AT1G05910	1210	c33774.graph_c0	4597	0	1423	0	1	1210	606	4262	0.703	0.609
AT1G05940	569	c48516.graph_c0	2624	0	632	0	20	565	437	2230	0.664	0.542
AT1G05950	627	c40812.graph_c0	1819	1e-50	198	0	18	306	378	1331	0.541	0.366
AT1G05960	982	c44792.graph_c0	3967	0	1004	0	1	982	586	3591	0.683	0.527
AT1G05970	200	c40456.graph_c0	1075	2e-51	199	0	1	194	231	812	0.68	0.469
AT1G06020	345	c44443.graph_c0	1484	1e-156	546	0	6	326	273	1235	0.91	0.813
AT1G06040	177	c21040.graph_c0	1891	7e-52	200	0	1	168	877	1374	0.686	0.615
AT1G06050	313	c41164.graph_c0	1456	1e-106	380	0	10	290	319	1149	0.797	0.648
AT1G06060	213	c42631.graph_c0	1397	2e-74	275	0	1	213	498	1136	0.779	0.61
AT1G06070	423	c37556.graph_c0	2277	1e-110	396	0	56	339	441	1295	0.83	0.727
AT1G06110	436	c35487.graph_c0	1822	1e-147	520	0	2	436	231	1511	0.738	0.581
AT1G06130	330	c43591.graph_c0	1559	1e-135	478	0	2	328	393	1376	0.826	0.674
AT1G06150	1322	c48589.graph_c0	5620	1e-125	447	0	1	732	1451	3562	0.546	0.4
AT1G06190	401	c39054.graph_c0	1608	2e-36	150	0	2	191	79	660	0.653	0.487
AT1G06210	383	c40515.graph_c0	1627	1e-79	293	0	1	309	472	1434	0.709	0.505
AT1G06220	987	c48204.graph_c0	4669	0	1744	0	1	987	287	3271	0.908	0.838
AT1G06230	766	c40501.graph_c0	2606	1e-107	386	0	264	702	630	1925	0.649	0.486
AT1G06240	383	c42411.graph_c0	1593	1e-111	400	0	33	377	195	1190	0.684	0.58
AT1G06260	343	c50135.graph_c0	2052	1e-107	385	0	9	342	389	1393	0.718	0.558
AT1G06270	343	c47893.graph_c1	1676	5e-99	358	0	23	343	251	1228	0.709	0.518
AT1G06280	206	c30542.graph_c0	965	4e-36	148	0	22	115	632	916	0.863	0.695
AT1G06290	675	c42922.graph_c0	2416	0	1000	0	34	675	235	2163	0.851	0.722
AT1G06410	851	c43996.graph_c0	4010	0	1330	0	1	838	288	2819	0.864	0.743
AT1G06440	390	c46352.graph_c1	2371	1e-148	520	0	3	388	940	2106	0.779	0.638
AT1G06460	285	c40240.graph_c0	1645	1e-49	194	0	18	285	514	1410	0.545	0.372
AT1G06470	414	c43991.graph_c0	2557	6e-72	153	0	148	264	1389	1730	0.752	0.692
AT1G06520	585	c50753.graph_c0	2065	1e-166	580	0	1	584	263	1918	0.656	0.519
AT1G06550	387	c48642.graph_c0	2572	1e-169	592	0	7	386	1328	2464	0.871	0.732
AT1G06560	599	c27739.graph_c0	2251	0	719	0	44	599	234	1838	0.749	0.655
AT1G06570	473	c48716.graph_c0	2453	1e-170	595	0	57	469	1061	2281	0.819	0.713
AT1G06590	916	c48584.graph_c0	3501	0	938	0	1	915	206	3046	0.658	0.525
AT1G06620	365	c38110.graph_c0	1471	1e-113	404	0	12	365	281	1357	0.691	0.56
AT1G06660	481	c33323.graph_c0	2001	7e-47	185	0	257	451	959	1555	0.662	0.531
AT1G06680	219	c20961.graph_c0	1426	5e-84	307	0	40	210	563	1075	0.93	0.825
AT1G06690	377	c38018.graph_c0	1667	1e-168	590	0	3	377	287	1432	0.859	0.747
AT1G06710	997	c48413.graph_c1	4839	0	1164	0	69	988	1471	4221	0.772	0.602
AT1G06720	1147	c44492.graph_c0	4293	1e-166	582	0	709	1093	581	1756	0.819	0.696
AT1G06730	488	c44857.graph_c0	1993	2e-91	333	0	207	485	324	1151	0.763	0.57
AT1G06780	589	c44393.graph_c0	2562	0	639	0	1	589	263	2068	0.695	0.522
AT1G06790	204	c34437.graph_c0	1201	9e-60	226	0	1	195	82	657	0.805	0.6
AT1G06840	953	c47283.graph_c0	2831	0	353	0	25	280	1860	2627	0.758	0.676
AT1G06870	367	c43788.graph_c0	1860	2e-90	329	0	1	357	378	1496	0.637	0.473
AT1G06890	357	c38022.graph_c0	1853	1e-145	512	0	1	328	469	1452	0.829	0.774
AT1G06900	1024	c45909.graph_c0	3990	0	1345	0	11	1024	224	3277	0.772	0.641
AT1G06950	1016	c47357.graph_c0	4600	0	1264	0	29	1016	1300	4266	0.783	0.637
AT1G06980	169	c30970.graph_c1	695	8e-44	173	0	1	87	98	358	0.989	0.92
AT1G07010	389	c48023.graph_c1	1707	1e-149	525	0	39	389	313	1362	0.84	0.724
AT1G07030	326	c38761.graph_c1	1659	1e-120	427	0	31	326	408	1301	0.783	0.686
AT1G07040	371	c45164.graph_c1	1926	7e-61	231	0	71	233	408	893	0.791	0.669
AT1G07060	233	c25257.graph_c0	1215	3e-29	125	0	14	210	536	1126	0.587	0.403
AT1G07080	265	c37038.graph_c0	1304	1e-56	216	0	44	226	454	996	0.721	0.541
AT1G07110	744	c40042.graph_c0	2728	0	1121	0	22	744	275	2440	0.838	0.751
AT1G07120	392	c46262.graph_c0	1687	1e-106	383	0	8	387	188	1378	0.665	0.524
AT1G07130	160	c22005.graph_c0	861	3e-31	130	0	7	156	3	452	0.609	0.43
AT1G07140	228	c42025.graph_c0	1916	1e-62	236	0	27	153	1300	1680	0.929	0.819
AT1G07150	499	c21768.graph_c0	1460	6e-89	325	0	23	367	282	1322	0.654	0.51
AT1G07160	380	c21024.graph_c0	1721	1e-104	225	0	80	265	239	784	0.766	0.612
AT1G07210	261	c37665.graph_c0	2073	4e-42	168	0	1	253	183	959	0.581	0.419
AT1G07220	507	c47137.graph_c0	2580	1e-178	622	0	1	492	175	1635	0.733	0.603
AT1G07230	533	c44369.graph_c0	2183	0	814	0	34	521	432	1895	0.883	0.791
AT1G07290	375	c47318.graph_c0	1673	1e-132	469	0	44	375	273	1286	0.79	0.701
AT1G07310	352	c42164.graph_c0	1368	1e-35	147	0	7	167	630	1103	0.646	0.422
AT1G07320	282	c37875.graph_c0	1479	8e-72	267	0	47	262	330	968	0.727	0.602
AT1G07360	481	c49171.graph_c2	1564	1e-172	602	0	1	368	276	1427	0.846	0.776
AT1G07380	779	c26481.graph_c0	2929	0	1126	0	27	779	374	2635	0.821	0.709
AT1G07410	214	c20826.graph_c0	1382	1e-113	405	0	1	214	513	1154	0.953	0.897
AT1G07420	266	c36644.graph_c0	1692	1e-136	480	0	1	260	585	1364	0.938	0.869
AT1G07480	375	c42756.graph_c0	2266	2e-94	343	0	3	375	725	1885	0.621	0.519
AT1G07510	813	c35991.graph_c0	3140	0	1151	0	1	813	300	2735	0.79	0.725
AT1G07530	769	c48077.graph_c0	3148	1e-172	584	0	226	733	1116	2585	0.735	0.567
AT1G07540	630	c40577.graph_c1	2480	1e-89	328	0	211	621	185	1423	0.593	0.477
AT1G07615	493	c42584.graph_c0	2323	6e-96	348	0	220	493	438	1241	0.815	0.64
AT1G07630	662	c38703.graph_c0	2138	1e-154	541	0	67	662	91	1923	0.626	0.488
AT1G07645	137	c24677.graph_c0	674	6e-59	222	0	1	136	223	627	0.89	0.779
AT1G07650	1014	c33564.graph_c0	2929	0	786	0	139	966	398	2929	0.664	0.491
AT1G07670	1061	c21053.graph_c0	3849	0	1741	0	1	1052	430	3591	0.902	0.819
AT1G07700	204	c38337.graph_c0	1444	3e-57	218	0	68	204	405	845	0.837	0.721
AT1G07745	322	c47631.graph_c0	1963	2e-78	200	0	57	254	314	916	0.693	0.512
AT1G07780	213	c48494.graph_c0	1851	5e-52	137	0	49	146	854	1147	0.827	0.673
AT1G07790	148	c37266.graph_c1	480	8e-43	169	0	47	138	1	276	0.989	0.967
AT1G07795	118	c74577.graph_c0	371	6e-20	92.8	0	14	97	104	370	0.719	0.472
AT1G07830	144	c21479.graph_c0	1074	1e-51	198	0	36	144	450	776	0.927	0.853
AT1G07840	279	c43937.graph_c0	1561	2e-77	286	0	13	271	587	1384	0.73	0.573
AT1G07850	541	c23251.graph_c1	1928	1e-175	613	0	123	536	320	1561	0.79	0.686
AT1G07880	254	c37965.graph_c0	1789	1e-122	434	0	4	249	966	1703	0.911	0.817
AT1G07890	250	c49486.graph_c2	1121	1e-107	384	0	1	250	114	863	0.824	0.716
AT1G07910	1104	c49340.graph_c1	3894	0	1543	0	1	1104	337	3660	0.789	0.677
AT1G07950	154	c42949.graph_c0	1465	5e-51	196	0	27	149	743	1111	0.919	0.74
AT1G07960	146	c37927.graph_c0	1220	6e-40	159	0	24	124	269	571	0.832	0.733
AT1G07970	693	c47652.graph_c1	2524	1e-171	558	0	172	693	507	2051	0.676	0.544
AT1G07980	206	c28201.graph_c0	1351	2e-21	99.8	0	110	186	529	762	0.821	0.59
AT1G07985	144	c43483.graph_c0	894	2e-14	75.5	0	1	94	230	523	0.622	0.449
AT1G07990	802	c42446.graph_c0	3301	0	930	0	1	802	406	2946	0.692	0.583
AT1G08030	500	c49501.graph_c1	2652	1e-106	174	0	192	322	900	1292	0.817	0.611
AT1G08060	2001	c48914.graph_c0	6824	3e-58	225	0	477	838	3085	4191	0.567	0.358
AT1G08070	741	c32174.graph_c0	2550	0	957	0	16	741	156	2324	0.789	0.612
AT1G08080	275	c34819.graph_c0	1069	1e-66	250	0	33	275	93	818	0.646	0.49
AT1G08110	185	c25440.graph_c0	1558	6e-81	296	0	4	185	808	1353	0.824	0.78
AT1G08130	790	c47618.graph_c0	2884	0	1029	0	29	779	80	2317	0.812	0.676
AT1G08170	243	c20569.graph_c0	1149	7e-35	144	0	151	242	266	541	0.88	0.685
AT1G08190	980	c38084.graph_c0	3269	0	1292	0	43	975	191	2908	0.79	0.67
AT1G08200	389	c49885.graph_c0	2010	0	749	0	5	389	626	1780	0.961	0.919
AT1G08230	451	c41971.graph_c0	1639	1e-167	585	0	4	451	175	1509	0.768	0.612
AT1G08250	413	c40080.graph_c0	1839	1e-163	572	0	14	402	566	1753	0.809	0.737
AT1G08260	2161	c46894.graph_c0	6860	0	3022	0	1	2156	101	6736	0.788	0.679
AT1G08280	398	c27717.graph_c0	2172	1e-107	385	0	1	397	458	1636	0.64	0.488
AT1G08290	337	c44088.graph_c0	1799	5e-89	325	0	164	336	618	1127	0.925	0.838
AT1G08315	325	c40843.graph_c0	1400	2e-72	269	0	5	304	384	1274	0.703	0.528
AT1G08320	357	c44282.graph_c0	2333	1e-121	430	0	33	357	1013	2002	0.761	0.661
AT1G08370	367	c28628.graph_c0	1710	1e-106	383	0	1	364	388	1479	0.659	0.576
AT1G08380	140	c20999.graph_c0	953	9e-56	212	0	1	140	395	835	0.837	0.735
AT1G08400	804	c45766.graph_c0	2635	1e-166	547	0	163	793	602	2452	0.647	0.465
AT1G08410	589	c45120.graph_c0	2438	0	712	0	1	587	172	1965	0.718	0.609
AT1G08440	501	c19336.graph_c0	1745	1e-99	361	0	18	392	546	1679	0.646	0.483
AT1G08450	424	c43174.graph_c0	3649	1e-159	559	0	29	360	238	1233	0.913	0.813
AT1G08460	377	c46099.graph_c0	2006	1e-137	486	0	5	377	822	1934	0.74	0.625
AT1G08470	390	c48602.graph_c2	1629	1e-154	542	0	2	389	359	1519	0.802	0.652
AT1G08480	142	c37052.graph_c0	1111	3e-51	197	0	15	142	311	694	0.813	0.672
AT1G08490	463	c39649.graph_c0	1758	0	693	0	53	462	297	1526	0.888	0.802
AT1G08500	228	c37101.graph_c0	1112	3e-37	152	0	24	193	218	751	0.552	0.448
AT1G08510	412	c19889.graph_c0	1406	2e-91	333	0	123	402	176	1021	0.749	0.565
AT1G08520	760	c49251.graph_c1	2631	1e-169	591	0	45	400	219	1271	0.89	0.817
AT1G08530	257	c45252.graph_c0	2308	4e-63	238	0	96	251	921	1388	0.897	0.731
AT1G08540	572	c43397.graph_c0	2268	1e-156	549	0	211	552	417	1442	0.892	0.795
AT1G08550	462	c46163.graph_c0	2054	1e-163	573	0	103	462	659	1723	0.847	0.75
AT1G08560	310	c27780.graph_c0	1273	1e-103	373	0	1	286	292	1143	0.806	0.657
AT1G08570	177	c44370.graph_c0	1586	1e-73	272	0	1	145	636	1070	0.945	0.862
AT1G08580	123	c40544.graph_c0	899	4e-10	60.5	0	1	89	120	383	0.506	0.393
AT1G08590	1029	c49376.graph_c0	3469	0	821	0	268	1025	200	2455	0.693	0.57
AT1G08600	1479	c48813.graph_c1	3863	0	817	0	495	1172	1	1983	0.73	0.623
AT1G08610	559	c48881.graph_c0	2545	1e-140	496	0	16	543	517	2109	0.645	0.474
AT1G08620	1209	c46947.graph_c0	5109	0	1153	0	1	1208	395	4048	0.633	0.511
AT1G08630	358	c46261.graph_c0	2087	1e-87	320	0	1	202	1482	2087	0.851	0.752
AT1G08640	294	c34376.graph_c0	1215	1e-80	296	0	73	294	460	1125	0.766	0.649
AT1G08650	276	c49001.graph_c0	3069	1e-80	296	0	13	263	264	1022	0.702	0.573
AT1G08660	347	c33775.graph_c0	2302	1e-156	546	0	1	343	887	1918	0.843	0.759
AT1G08680	651	c45303.graph_c2	3162	1e-107	388	0	17	651	851	2878	0.529	0.384
AT1G08700	453	c34973.graph_c0	1972	1e-122	435	0	1	453	302	1576	0.633	0.528
AT1G08710	274	c47739.graph_c2	1406	2e-31	133	0	56	238	137	685	0.568	0.432
AT1G08720	933	c46827.graph_c1	5760	0	786	0	70	921	433	3075	0.636	0.498
AT1G08750	388	c47681.graph_c0	3022	1e-131	465	0	23	251	354	1040	0.991	0.943
AT1G08760	748	c45906.graph_c0	3495	1e-180	630	0	1	721	743	2935	0.639	0.503
AT1G08770	209	c39819.graph_c1	1449	1e-29	126	0	29	178	510	953	0.58	0.4
AT1G08780	129	c21513.graph_c0	923	1e-44	174	0	3	129	169	543	0.803	0.685
AT1G08820	386	c36691.graph_c0	2013	2e-60	229	0	6	382	545	1459	0.537	0.392
AT1G08830	152	c21226.graph_c0	1298	9e-72	265	0	1	152	220	675	0.921	0.882
AT1G08840	1315	c45801.graph_c0	4620	0	1375	0	59	1315	443	4285	0.695	0.553
AT1G08845	189	c35221.graph_c0	939	3e-75	278	0	1	189	183	743	0.825	0.698
AT1G08860	584	c45920.graph_c0	2594	0	787	0	1	579	442	2154	0.784	0.656
AT1G08960	546	c45184.graph_c0	2727	1e-125	326	0	284	545	1147	1932	0.74	0.634
AT1G08970	231	c37481.graph_c0	1799	2e-54	209	0	67	173	507	827	0.981	0.897
AT1G08990	566	c41259.graph_c0	2264	1e-133	472	0	63	564	418	1956	0.645	0.459
AT1G09010	944	c48804.graph_c2	3447	0	1432	0	1	943	305	3205	0.822	0.702
AT1G09020	487	c41406.graph_c0	2190	0	746	0	1	486	528	2003	0.858	0.738
AT1G09040	911	c50758.graph_c0	3541	1e-110	395	0	22	813	325	2526	0.483	0.349
AT1G09060	930	c47391.graph_c0	3962	0	900	0	16	930	873	3677	0.657	0.495
AT1G09070	324	c21602.graph_c0	1268	9e-36	147	0	1	139	23	466	0.678	0.503
AT1G09130	370	c40625.graph_c0	1678	1e-132	468	0	41	328	263	1126	0.92	0.806
AT1G09150	181	c46806.graph_c0	1500	8e-90	326	0	1	181	681	1223	0.917	0.851
AT1G09155	289	c40809.graph_c0	997	4e-68	255	0	3	279	134	979	0.606	0.465
AT1G09160	428	c38060.graph_c0	2059	0	644	0	1	427	434	1711	0.834	0.733
AT1G09195	320	c54282.graph_c0	1349	1e-49	194	0	21	190	26	562	0.728	0.556
AT1G09210	424	c33649.graph_c0	1910	1e-170	595	0	18	353	729	1736	0.917	0.845
AT1G09220	504	c52916.graph_c0	1262	4e-92	335	0	183	503	299	1261	0.668	0.512
AT1G09230	442	c47638.graph_c0	5562	4e-64	132	0	28	157	1345	1752	0.654	0.485
AT1G09240	320	c44302.graph_c1	4266	4e-97	351	0	1	274	1203	2018	0.789	0.644
AT1G09270	456	c26328.graph_c0	2184	0	772	0	1	455	499	1860	0.914	0.827
AT1G09280	581	c46712.graph_c1	2179	7e-99	358	0	13	259	1215	1985	0.813	0.708
AT1G09290	348	c38568.graph_c0	1521	1e-71	267	0	6	345	109	1116	0.611	0.45
AT1G09300	462	c45585.graph_c0	3043	1e-82	304	0	234	442	893	1615	0.739	0.618
AT1G09330	186	c25512.graph_c0	1315	2e-77	285	0	5	186	256	801	0.857	0.775
AT1G09340	378	c49846.graph_c0	1774	0	640	0	2	376	522	1655	0.899	0.799
AT1G09380	374	c20013.graph_c0	1550	1e-105	379	0	2	358	107	1195	0.686	0.532
AT1G09390	370	c43705.graph_c0	1838	1e-140	493	0	30	368	665	1675	0.824	0.692
AT1G09420	625	c47868.graph_c0	3653	0	398	0	359	625	1689	2495	0.844	0.71
AT1G09430	424	c21534.graph_c0	1843	0	771	0	1	423	396	1664	0.941	0.861
AT1G09450	599	c41740.graph_c0	2271	1e-151	533	0	6	597	161	1993	0.643	0.505
AT1G09460	330	c45384.graph_c0	2039	8e-32	134	0	137	218	868	1119	0.869	0.714
AT1G09520	260	c33928.graph_c0	1359	3e-18	89.4	0	24	202	527	1189	0.442	0.33
AT1G09530	524	c47806.graph_c0	3212	3e-39	160	0	273	412	1209	1619	0.729	0.607
AT1G09540	366	c35409.graph_c2	622	4e-72	269	0	1	140	169	588	0.943	0.893
AT1G09570	1122	c42529.graph_c0	4309	0	1699	0	25	1122	552	3839	0.863	0.747
AT1G09575	292	c41748.graph_c0	1412	1e-74	276	0	58	257	490	1086	0.81	0.65
AT1G09580	217	c43474.graph_c0	1141	1e-78	289	0	24	217	234	818	0.851	0.692
AT1G09610	282	c50022.graph_c0	1227	1e-117	418	0	29	282	186	938	0.863	0.766
AT1G09620	1091	c49542.graph_c0	4990	0	1605	0	1	1084	288	3548	0.817	0.699
AT1G09630	217	c35831.graph_c0	1053	1e-111	397	0	1	216	286	930	0.949	0.889
AT1G09680	607	c38748.graph_c0	2631	0	632	0	29	607	865	2568	0.705	0.54
AT1G09690	164	c26011.graph_c0	1202	3e-81	297	0	1	164	489	980	0.921	0.841
AT1G09700	419	c45974.graph_c0	2286	1e-68	257	0	6	203	492	1091	0.761	0.657
AT1G09730	963	c45419.graph_c0	3425	1e-113	407	0	278	749	1115	2584	0.608	0.457
AT1G09750	449	c39866.graph_c0	1999	1e-121	433	0	38	449	321	1529	0.685	0.596
AT1G09760	249	c44981.graph_c2	1627	7e-63	237	0	1	238	504	1232	0.663	0.613
AT1G09770	844	c45215.graph_c0	3993	0	1177	0	1	815	1247	3676	0.806	0.703
AT1G09780	557	c48902.graph_c0	2483	0	983	0	2	557	268	1935	0.919	0.849
AT1G09800	372	c48655.graph_c0	1565	1e-130	244	0	175	371	396	941	0.737	0.626
AT1G09810	470	c40174.graph_c0	2191	2e-85	313	0	89	456	840	1892	0.605	0.472
AT1G09815	124	c41103.graph_c0	915	3e-35	143	0	1	124	451	828	0.73	0.548
AT1G09820	606	c38134.graph_c0	2795	1e-166	583	0	25	606	318	2069	0.688	0.486
AT1G09830	532	c39636.graph_c0	2244	0	720	0	27	526	461	1990	0.804	0.71
AT1G09850	437	c43810.graph_c0	1822	1e-166	583	0	35	433	318	1517	0.813	0.675
AT1G09870	487	c41499.graph_c0	2149	1e-180	627	0	19	486	621	2021	0.774	0.62
AT1G09890	617	c44677.graph_c0	2441	0	905	0	1	616	266	2107	0.817	0.69
AT1G09900	598	c42422.graph_c0	1622	0	701	0	198	598	419	1621	0.92	0.818
AT1G09920	192	c44648.graph_c0	1328	1e-59	226	0	1	192	153	743	0.675	0.584
AT1G09960	510	c50174.graph_c0	2282	1e-179	625	0	43	505	264	1676	0.794	0.671
AT1G09970	976	c42932.graph_c0	3807	0	1067	0	42	974	912	3737	0.723	0.584
AT1G10020	461	c42951.graph_c0	2100	1e-156	547	0	1	457	328	1683	0.729	0.641
AT1G10030	129	c39210.graph_c0	1065	4e-51	196	0	1	129	123	497	0.837	0.752
AT1G10040	412	c29457.graph_c0	1529	1e-110	395	0	53	410	249	1379	0.684	0.553
AT1G10050	1063	c47889.graph_c0	4152	0	1254	0	5	1063	660	3803	0.732	0.581
AT1G10070	388	c24334.graph_c0	1370	1e-133	473	0	53	388	126	1136	0.801	0.644
AT1G10095	420	c46204.graph_c0	3219	4e-18	90.1	0	302	410	333	659	0.615	0.385
AT1G10120	366	c49199.graph_c1	2368	1e-63	240	0	46	366	582	1685	0.566	0.44
AT1G10130	998	c40872.graph_c1	2460	0	1240	0	1	760	178	2460	0.875	0.799
AT1G10150	414	c40842.graph_c0	1766	1e-103	372	0	1	401	380	1621	0.627	0.467
AT1G10170	1188	c45160.graph_c0	3502	0	1270	0	186	1188	375	3419	0.759	0.636
AT1G10180	769	c41819.graph_c0	2794	0	761	0	1	763	149	2425	0.69	0.524
AT1G10200	190	c26350.graph_c0	1592	2e-70	261	0	2	175	371	886	0.828	0.713
AT1G10210	370	c43358.graph_c0	1996	0	635	0	1	370	361	1470	0.878	0.803
AT1G10220	267	c43649.graph_c0	1012	2e-08	56.6	0	25	75	824	973	0.765	0.51
AT1G10240	680	c47198.graph_c0	2930	0	1125	0	10	669	436	2412	0.9	0.788
AT1G10270	913	c45954.graph_c0	3664	0	670	0	86	600	253	1797	0.775	0.637
AT1G10280	412	c35434.graph_c0	1616	1e-129	459	0	2	412	227	1366	0.688	0.553
AT1G10290	914	c43582.graph_c0	3320	0	1255	0	1	884	597	3263	0.823	0.727
AT1G10310	242	c28273.graph_c0	954	4e-94	341	0	18	242	214	915	0.838	0.714
AT1G10320	757	c48134.graph_c1	4384	5e-62	236	0	293	451	672	1148	0.78	0.673
AT1G10330	467	c46267.graph_c0	2925	1e-117	420	0	11	464	1166	2569	0.632	0.468
AT1G10370	227	c44498.graph_c0	1429	1e-79	293	0	5	227	529	1194	0.789	0.646
AT1G10380	305	c44992.graph_c0	1266	6e-86	314	0	27	300	215	1033	0.718	0.531
AT1G10390	1041	c49268.graph_c0	3688	1e-153	540	0	527	1039	442	1944	0.645	0.553
AT1G10417	431	c42338.graph_c0	2315	9e-63	238	0	79	329	327	1076	0.733	0.538
AT1G10430	306	c36626.graph_c0	1980	1e-178	620	0	1	306	688	1605	0.987	0.954
AT1G10460	217	c44113.graph_c0	1135	4e-58	221	0	16	216	436	1035	0.682	0.537
AT1G10480	211	c20793.graph_c0	1092	2e-09	60.1	0	58	158	368	658	0.454	0.398
AT1G10490	1028	c47639.graph_c0	3521	0	1375	0	1	1028	386	3466	0.781	0.665
AT1G10500	180	c26701.graph_c0	1031	1e-51	199	0	65	177	349	687	0.903	0.779
AT1G10510	605	c45421.graph_c0	2244	9e-33	139	0	522	605	842	1093	0.881	0.81
AT1G10520	529	c46630.graph_c0	2594	1e-105	379	0	1	361	22	1176	0.675	0.541
AT1G10522	179	c45592.graph_c1	2645	4e-52	201	0	62	176	2036	2380	0.887	0.765
AT1G10550	310	c33931.graph_c0	1114	9e-99	357	0	29	310	163	1008	0.739	0.581
AT1G10580	573	c39623.graph_c0	2330	0	863	0	26	573	474	2135	0.832	0.755
AT1G10585	181	c51542.graph_c0	779	5e-13	71.2	0	9	176	199	741	0.5	0.28
AT1G10590	139	c38008.graph_c0	1122	2e-58	221	0	1	137	579	983	0.898	0.766
AT1G10600	166	c43730.graph_c0	3261	5e-51	197	0	46	166	2482	2844	0.843	0.711
AT1G10610	441	c42080.graph_c0	2198	5e-31	132	0	8	167	1306	1794	0.57	0.395
AT1G10630	181	c34070.graph_c0	1253	1e-103	372	0	1	181	534	1076	0.989	0.989
AT1G10640	532	c26844.graph_c0	2181	1e-173	606	0	119	532	527	1774	0.847	0.693
AT1G10650	339	c41845.graph_c0	2225	1e-100	361	0	40	339	336	1229	0.723	0.584
AT1G10670	423	c33143.graph_c0	1868	0	727	0	1	423	337	1605	0.894	0.827
AT1G10700	411	c23993.graph_c0	1778	1e-162	568	0	86	411	561	1538	0.908	0.822
AT1G10710	410	c29281.graph_c0	1067	2e-28	124	0	59	345	81	776	0.466	0.308
AT1G10720	429	c34024.graph_c0	1905	2e-49	194	0	32	408	117	1310	0.491	0.394
AT1G10740	473	c40030.graph_c0	2493	0	640	0	87	455	480	1583	0.9	0.794
AT1G10760	1399	c45660.graph_c0	5158	0	1890	0	1	1399	497	4879	0.767	0.648
AT1G10780	418	c35200.graph_c0	1814	1e-144	507	0	1	418	246	1733	0.681	0.532
AT1G10800	118	c63107.graph_c0	720	2e-11	64.7	0	1	105	52	366	0.571	0.371
AT1G10830	367	c37363.graph_c0	1787	1e-129	459	0	53	367	592	1518	0.813	0.679
AT1G10840	337	c49273.graph_c0	2753	1e-154	542	0	31	337	1642	2562	0.932	0.84
AT1G10850	663	c42395.graph_c0	1375	1e-139	493	0	322	663	42	1040	0.822	0.708
AT1G10890	288	c45916.graph_c0	6031	3e-13	72.8	0	129	288	398	853	0.444	0.363
AT1G10900	754	c37539.graph_c0	2986	0	952	0	4	751	544	2856	0.752	0.607
AT1G10910	664	c43000.graph_c0	2438	1e-150	528	0	207	647	156	1478	0.787	0.605
AT1G10950	589	c42928.graph_c0	2524	0	846	0	25	589	432	2126	0.786	0.726
AT1G10970	408	c40770.graph_c1	2154	2e-64	243	0	247	408	1084	1569	0.858	0.722
AT1G11000	573	c51491.graph_c0	1704	1e-168	589	0	77	533	284	1636	0.762	0.626
AT1G11020	321	c37600.graph_c0	1512	1e-116	415	0	42	312	296	1081	0.797	0.745
AT1G11040	438	c22943.graph_c0	1028	2e-65	246	0	225	435	359	991	0.72	0.54
AT1G11050	625	c42090.graph_c0	3080	0	770	0	27	625	585	2420	0.742	0.619
AT1G11060	930	c44625.graph_c0	3532	1e-142	504	0	157	930	563	2938	0.567	0.419
AT1G11080	492	c28441.graph_c0	2315	0	641	0	12	472	748	2112	0.785	0.678
AT1G11090	324	c42437.graph_c0	1891	1e-117	417	0	11	315	737	1645	0.784	0.633
AT1G11120	161	c49652.graph_c0	431	4e-27	117	0	1	131	1	369	0.629	0.538
AT1G11190	305	c46722.graph_c0	1581	1e-121	433	0	8	305	446	1336	0.822	0.668
AT1G11240	200	c36624.graph_c0	1070	5e-09	58.2	0	19	81	784	972	0.603	0.444
AT1G11250	298	c37999.graph_c0	1234	1e-120	429	0	1	274	106	939	0.845	0.755
AT1G11260	522	c44134.graph_c0	2068	0	767	0	1	514	285	1829	0.828	0.725
AT1G11320	424	c43459.graph_c0	1659	3e-97	343	0	30	424	256	1437	0.635	0.447
AT1G11330	840	c46437.graph_c0	2859	0	787	0	31	840	290	2689	0.649	0.495
AT1G11360	242	c34171.graph_c0	1560	2e-65	245	0	35	195	380	886	0.805	0.698
AT1G11380	254	c43583.graph_c0	3151	9e-22	100	0	125	203	1593	1829	0.759	0.582
AT1G11390	624	c43478.graph_c0	2534	0	805	0	77	624	512	2170	0.838	0.69
AT1G11400	204	c27187.graph_c0	1621	1e-30	129	0	14	200	339	953	0.527	0.395
AT1G11410	845	c47019.graph_c0	3620	0	676	0	17	738	158	2521	0.594	0.437
AT1G11430	232	c21294.graph_c0	1505	5e-80	294	0	37	232	218	802	0.853	0.777
AT1G11440	363	c26498.graph_c0	2177	4e-10	62.8	0	277	343	551	742	0.662	0.456
AT1G11480	578	c21603.graph_c0	2889	4e-85	312	0	1	578	233	2101	0.506	0.39
AT1G11530	118	c49990.graph_c0	978	6e-37	149	0	2	112	309	641	0.766	0.622
AT1G11545	305	c25907.graph_c0	1297	1e-132	467	0	6	303	274	1173	0.854	0.725
AT1G11570	132	c20787.graph_c0	607	5e-45	176	0	10	131	73	429	0.82	0.705
AT1G11580	557	c42785.graph_c0	2019	1e-154	541	0	58	557	307	1803	0.692	0.553
AT1G11600	510	c35752.graph_c0	1922	0	678	0	18	509	91	1572	0.782	0.641
AT1G11650	405	c34251.graph_c0	1645	1e-109	392	0	57	339	327	1169	0.796	0.665
AT1G11655	113	c36426.graph_c0	858	3e-14	74.3	0	10	100	399	677	0.688	0.419
AT1G11660	763	c49506.graph_c1	4433	0	890	0	1	763	378	2714	0.72	0.571
AT1G11680	488	c36860.graph_c0	2017	0	797	0	1	487	193	1653	0.9	0.791
AT1G11700	201	c40722.graph_c0	1492	4e-23	104	0	34	201	624	1148	0.459	0.41
AT1G11720	1042	c47204.graph_c0	5075	0	964	0	129	821	1422	3482	0.785	0.645
AT1G11750	271	c21203.graph_c0	1368	1e-105	378	0	30	271	391	1134	0.835	0.734
AT1G11755	254	c39538.graph_c0	2002	2e-48	189	0	9	225	454	1089	0.639	0.47
AT1G11760	151	c41074.graph_c0	1046	5e-44	173	0	1	151	206	637	0.743	0.632
AT1G11770	536	c39785.graph_c0	2089	1e-153	537	0	26	529	347	1852	0.703	0.524
AT1G11780	345	c38903.graph_c0	1703	1e-128	455	0	7	345	511	1554	0.755	0.65
AT1G11790	392	c43027.graph_c0	2167	1e-129	252	0	20	238	909	1568	0.733	0.606
AT1G11800	441	c47823.graph_c0	1835	1e-123	437	0	22	439	223	1572	0.634	0.503
AT1G11820	384	c21662.graph_c0	2002	1e-165	578	0	33	370	370	1383	0.923	0.799
AT1G11840	283	c43419.graph_c0	1425	1e-137	483	0	1	283	303	1151	0.908	0.809
AT1G11860	408	c49851.graph_c0	1863	0	748	0	1	408	218	1441	0.931	0.873
AT1G11870	512	c44880.graph_c0	2661	1e-150	464	0	130	422	543	1421	0.863	0.717
AT1G11880	489	c48355.graph_c0	2893	1e-90	236	0	149	310	619	1104	0.821	0.679
AT1G11890	218	c38065.graph_c0	1275	1e-116	412	0	1	218	181	834	0.954	0.89
AT1G11900	367	c40524.graph_c1	1108	3e-45	179	0	77	296	1	654	0.67	0.425
AT1G11910	506	c25756.graph_c0	2008	0	733	0	27	506	362	1771	0.817	0.723
AT1G11915	329	c36813.graph_c0	1121	1e-103	371	0	35	329	94	981	0.719	0.599
AT1G11930	255	c37041.graph_c0	1356	1e-108	387	0	7	255	510	1247	0.831	0.763
AT1G12000	566	c43533.graph_c1	2503	0	946	0	1	566	611	2305	0.884	0.801
AT1G12020	226	c37011.graph_c1	526	3e-20	95.9	0	1	118	73	441	0.612	0.496
AT1G12050	421	c44437.graph_c0	1832	0	696	0	4	420	324	1571	0.887	0.789
AT1G12060	215	c40802.graph_c0	1291	5e-35	144	0	16	215	457	1029	0.574	0.402
AT1G12064	109	c11343.graph_c0	265	7e-08	53.1	0	38	78	143	265	0.707	0.512
AT1G12110	590	c37045.graph_c0	2544	0	682	0	10	574	234	1931	0.735	0.606
AT1G12230	405	c25559.graph_c0	1649	1e-147	518	0	64	405	371	1393	0.88	0.734
AT1G12240	664	c35449.graph_c0	2550	0	802	0	19	648	458	2404	0.735	0.607
AT1G12250	280	c36751.graph_c0	1040	3e-86	315	0	87	280	294	875	0.84	0.789
AT1G12260	395	c38462.graph_c0	1570	1e-110	396	0	1	395	408	1511	0.674	0.539
AT1G12310	148	c20914.graph_c0	1080	5e-70	259	0	1	148	208	648	0.939	0.851
AT1G12330	505	c44959.graph_c0	2085	1e-108	390	0	23	461	246	1622	0.605	0.466
AT1G12350	317	c38473.graph_c0	1498	1e-109	391	0	11	316	409	1326	0.761	0.618
AT1G12360	666	c41568.graph_c0	2703	0	1010	0	12	648	488	2401	0.861	0.75
AT1G12370	496	c43200.graph_c4	2000	0	748	0	3	485	141	1568	0.845	0.722
AT1G12390	137	c28358.graph_c0	1180	9e-40	159	0	6	136	344	736	0.824	0.687
AT1G12400	71	c36060.graph_c0	662	3e-27	117	0	1	69	229	435	0.899	0.739
AT1G12410	279	c26366.graph_c0	1208	1e-122	435	0	1	279	169	1038	0.841	0.728
AT1G12420	441	c47937.graph_c1	2232	1e-167	586	0	1	441	546	1871	0.806	0.649
AT1G12430	919	c47785.graph_c0	3538	0	1222	0	81	917	488	2983	0.831	0.724
AT1G12460	882	c41751.graph_c0	3568	0	991	0	26	878	256	2889	0.713	0.573
AT1G12470	988	c40935.graph_c0	3609	0	1595	0	1	988	376	3336	0.867	0.769
AT1G12480	556	c41604.graph_c1	1473	1e-175	611	0	136	544	23	1228	0.822	0.732
AT1G12500	361	c38062.graph_c0	1732	1e-126	449	0	5	357	160	1233	0.769	0.667
AT1G12520	229	c38080.graph_c0	1301	4e-96	347	0	1	229	313	993	0.834	0.742
AT1G12530	193	c43849.graph_c0	1055	2e-29	125	0	2	193	81	800	0.504	0.371
AT1G12570	572	c26380.graph_c0	2372	0	719	0	4	572	208	1920	0.739	0.623
AT1G12580	522	c42193.graph_c0	2468	1e-173	605	0	1	522	534	2105	0.721	0.592
AT1G12600	349	c36211.graph_c0	1749	1e-159	557	0	1	349	227	1291	0.876	0.792
AT1G12640	462	c45305.graph_c0	1921	0	706	0	1	462	463	1830	0.833	0.723
AT1G12650	248	c49377.graph_c0	1817	7e-29	124	0	104	246	913	1338	0.615	0.448
AT1G12680	470	c40309.graph_c0	3976	1e-116	416	0	31	350	2465	3424	0.813	0.656
AT1G12700	735	c49511.graph_c0	2274	1e-131	466	0	38	588	319	1986	0.631	0.41
AT1G12740	472	c48672.graph_c0	1802	0	660	0	18	471	241	1605	0.818	0.679
AT1G12760	408	c21026.graph_c0	1966	1e-100	361	0	55	400	483	1574	0.634	0.505
AT1G12770	551	c36703.graph_c0	2164	0	650	0	1	547	303	1940	0.733	0.601
AT1G12780	351	c26562.graph_c0	1672	1e-170	593	0	1	350	522	1568	0.886	0.806
AT1G12790	250	c46551.graph_c0	2075	1e-49	193	0	1	184	237	869	0.618	0.467
AT1G12800	767	c48582.graph_c0	2676	0	646	0	44	767	273	2495	0.644	0.504
AT1G12830	213	c28355.graph_c0	1264	2e-07	53.1	0	167	196	593	682	0.833	0.733
AT1G12840	375	c26361.graph_c0	1776	1e-173	606	0	1	374	201	1331	0.875	0.751
AT1G12880	203	c37177.graph_c2	1419	8e-54	206	0	1	169	455	952	0.728	0.604
AT1G12900	350	c26050.graph_c0	1505	1e-169	591	0	4	350	235	1275	0.882	0.833
AT1G12930	1005	c45566.graph_c0	3457	0	1162	0	2	1001	245	3280	0.729	0.576
AT1G12940	502	c56339.graph_c0	1466	0	664	0	19	481	4	1389	0.793	0.689
AT1G12990	392	c48983.graph_c1	2748	0	686	0	4	392	1054	2217	0.915	0.802
AT1G13020	549	c39832.graph_c0	1511	6e-57	219	0	266	549	44	943	0.584	0.49
AT1G13030	608	c45130.graph_c0	2546	2e-38	157	0	326	608	1072	2109	0.476	0.327
AT1G13040	517	c29393.graph_c0	2668	1e-159	559	0	4	509	775	2286	0.719	0.534
AT1G13120	611	c45018.graph_c0	2730	1e-118	423	0	3	576	416	2269	0.565	0.384
AT1G13130	552	c40875.graph_c0	2176	1e-172	603	0	32	535	354	1865	0.723	0.559
AT1G13160	804	c43765.graph_c0	2832	1e-153	540	0	1	521	45	1604	0.683	0.529
AT1G13170	816	c45315.graph_c0	4179	0	1105	0	1	801	1470	3995	0.756	0.651
AT1G13180	427	c41291.graph_c0	2156	0	745	0	4	427	475	1749	0.922	0.816
AT1G13190	573	c43748.graph_c1	1470	6e-60	229	0	4	291	275	1147	0.551	0.471
AT1G13220	1128	c46778.graph_c0	4254	1e-128	396	0	1	634	135	2045	0.607	0.404
AT1G13230	424	c45525.graph_c0	2123	1e-112	401	0	27	423	346	1524	0.674	0.526
AT1G13250	345	c36319.graph_c0	1275	1e-131	465	0	21	340	246	1187	0.795	0.696
AT1G13260	344	c40613.graph_c0	2631	1e-108	389	0	16	344	1278	2396	0.697	0.568
AT1G13270	369	c39803.graph_c0	1526	1e-143	504	0	59	369	220	1149	0.875	0.778
AT1G13280	254	c43477.graph_c0	1471	7e-70	260	0	68	254	627	1181	0.813	0.674
AT1G13310	374	c45155.graph_c0	2781	3e-34	142	0	3	174	2019	2549	0.663	0.404
AT1G13330	226	c29099.graph_c0	1225	9e-83	303	0	1	226	423	1100	0.765	0.642
AT1G13340	409	c39041.graph_c0	1683	4e-63	239	0	1	189	206	772	0.762	0.603
AT1G13380	188	c39545.graph_c0	1250	6e-65	243	0	1	187	487	1059	0.785	0.66
AT1G13440	338	c33927.graph_c0	2442	1e-164	575	0	19	337	1266	2222	0.918	0.878
AT1G13450	406	c37995.graph_c0	1506	1e-125	444	0	79	405	376	1443	0.766	0.638
AT1G13520	387	c20818.graph_c0	1532	3e-85	276	0	1	328	93	1091	0.608	0.454
AT1G13560	389	c49486.graph_c0	4827	0	658	0	1	389	1523	2689	0.874	0.802
AT1G13570	416	c44724.graph_c0	2064	6e-98	318	0	4	273	459	1286	0.743	0.583
AT1G13580	308	c39634.graph_c0	1699	1e-145	510	0	1	308	354	1268	0.893	0.795
AT1G13630	806	c44969.graph_c1	3564	1e-176	615	0	1	738	1121	3334	0.625	0.433
AT1G13635	311	c26229.graph_c0	1464	3e-85	312	0	1	311	235	1209	0.65	0.495
AT1G13680	346	c48895.graph_c0	4168	1e-128	454	0	17	346	2985	4013	0.758	0.633
AT1G13690	177	c20713.graph_c0	930	1e-73	272	0	12	174	293	763	0.902	0.804
AT1G13700	268	c27471.graph_c0	1508	5e-95	344	0	1	267	484	1284	0.745	0.61
AT1G13740	348	c50142.graph_c0	1173	4e-35	145	0	203	348	328	765	0.644	0.537
AT1G13750	613	c47815.graph_c0	2424	0	966	0	24	613	488	2257	0.858	0.751
AT1G13770	353	c44510.graph_c0	3325	2e-69	259	0	68	244	1240	1770	0.825	0.723
AT1G13810	303	c49549.graph_c1	3501	7e-67	251	0	49	303	379	1140	0.676	0.508
AT1G13820	339	c43087.graph_c0	1963	1e-109	390	0	4	275	1005	1826	0.807	0.701
AT1G13830	197	c36614.graph_c0	1142	5e-20	94.7	0	19	106	651	917	0.64	0.539
AT1G13870	302	c42574.graph_c0	1474	1e-127	450	0	1	299	24	926	0.844	0.714
AT1G13900	656	c44308.graph_c0	2655	0	859	0	25	656	287	2191	0.782	0.64
AT1G13940	1005	c43783.graph_c0	3971	1e-86	318	0	1	984	488	3523	0.474	0.327
AT1G13950	158	c23705.graph_c0	535	2e-78	288	0	1	157	59	532	0.949	0.88
AT1G13980	1451	c41547.graph_c0	5312	0	2352	0	1	1438	520	4845	0.869	0.792
AT1G13990	277	c50151.graph_c0	1200	9e-80	293	0	88	272	247	819	0.838	0.738
AT1G14000	438	c47696.graph_c0	4305	1e-138	490	0	171	438	698	1501	0.944	0.851
AT1G14020	499	c24277.graph_c0	2676	0	736	0	9	488	776	2218	0.832	0.707
AT1G14030	482	c38410.graph_c0	1922	0	642	0	9	479	135	1568	0.814	0.649
AT1G14060	179	c27556.graph_c0	1010	3e-21	98.2	0	84	138	360	524	0.836	0.745
AT1G14130	308	c45345.graph_c0	1325	4e-96	348	0	9	301	337	1203	0.728	0.575
AT1G14150	190	c50054.graph_c0	952	9e-55	209	0	20	190	218	739	0.747	0.575
AT1G14180	297	c42991.graph_c0	2235	5e-47	185	0	60	285	394	1116	0.565	0.419
AT1G14190	501	c49085.graph_c1	2028	1e-171	599	0	1	483	208	1689	0.757	0.585
AT1G14205	165	c48032.graph_c0	1376	3e-47	184	0	29	164	791	1228	0.753	0.63
AT1G14270	353	c41698.graph_c0	1537	9e-90	291	0	118	353	456	1163	0.729	0.61
AT1G14300	339	c21596.graph_c0	1315	1e-125	445	0	1	326	211	1188	0.807	0.666
AT1G14340	244	c44950.graph_c0	1519	2e-65	245	0	6	240	547	1254	0.697	0.55
AT1G14345	196	c21054.graph_c0	987	7e-54	207	0	41	196	275	751	0.704	0.654
AT1G14360	331	c42841.graph_c0	1600	1e-173	603	0	1	331	415	1407	0.931	0.87
AT1G14390	747	c43468.graph_c1	2962	1e-154	541	0	35	747	130	2241	0.575	0.412
AT1G14410	263	c33694.graph_c0	1209	7e-90	327	0	48	263	222	881	0.869	0.733
AT1G14420	459	c49498.graph_c2	1838	1e-152	535	0	13	459	229	1521	0.717	0.576
AT1G14440	312	c22947.graph_c0	1212	5e-56	214	0	87	279	366	974	0.704	0.568
AT1G14450	73	c20902.graph_c0	873	2e-22	100	0	1	54	142	309	0.911	0.821
AT1G14510	252	c21036.graph_c0	1573	4e-87	318	0	1	248	367	1116	0.717	0.629
AT1G14530	293	c40791.graph_c0	1778	1e-123	438	0	11	293	320	1168	0.841	0.735
AT1G14570	468	c37628.graph_c0	1864	1e-142	503	0	1	468	159	1514	0.7	0.557
AT1G14590	386	c46461.graph_c0	1999	1e-128	454	0	15	364	284	1360	0.758	0.606
AT1G14610	1108	c50102.graph_c0	3789	0	1538	0	95	1103	506	3529	0.825	0.706
AT1G14620	233	c38265.graph_c0	1232	7e-78	287	0	27	233	388	999	0.802	0.647
AT1G14650	785	c46475.graph_c0	3156	0	687	0	1	535	1245	2864	0.772	0.662
AT1G14720	332	c36304.graph_c0	1513	1e-123	437	0	7	308	250	1164	0.823	0.652
AT1G14730	224	c41099.graph_c0	1006	1e-57	220	0	6	223	257	907	0.683	0.55
AT1G14740	733	c33546.graph_c0	3082	1e-173	607	0	7	730	409	2709	0.582	0.442
AT1G14750	410	c5441.graph_c0	457	8e-24	108	0	198	304	3	323	0.673	0.514
AT1G14790	1107	c48480.graph_c0	3769	0	1352	0	1	1107	224	3586	0.729	0.601
AT1G14810	375	c44948.graph_c0	1869	1e-174	607	0	19	373	236	1300	0.882	0.831
AT1G14830	614	c49102.graph_c0	2714	0	1045	0	1	613	263	2089	0.892	0.821
AT1G14850	1464	c49398.graph_c3	7111	0	866	0	745	1464	4589	6790	0.736	0.599
AT1G14870	152	c41047.graph_c0	865	1e-47	185	0	9	152	252	674	0.764	0.632
AT1G14890	219	c41714.graph_c0	1080	3e-39	158	0	58	215	258	761	0.663	0.491
AT1G14900	204	c37051.graph_c0	1202	3e-19	92.4	0	22	88	761	961	0.791	0.627
AT1G14920	533	c40233.graph_c0	2539	0	698	0	18	533	349	2067	0.729	0.624
AT1G15000	444	c27757.graph_c0	2448	1e-138	490	0	28	441	953	2206	0.729	0.58
AT1G15060	578	c48801.graph_c0	2383	0	379	0	10	345	217	1230	0.71	0.581
AT1G15080	290	c40617.graph_c0	1886	1e-117	417	0	1	289	873	1742	0.766	0.683
AT1G15100	155	c25659.graph_c0	1430	2e-26	115	0	1	152	307	822	0.587	0.442
AT1G15110	425	c47247.graph_c0	2364	1e-174	351	0	1	213	1228	1866	0.876	0.775
AT1G15120	69	c49679.graph_c0	3018	6e-28	119	0	1	69	178	387	0.929	0.829
AT1G15130	846	c41512.graph_c0	3303	0	1119	0	13	739	953	3133	0.849	0.739
AT1G15140	295	c37328.graph_c0	1388	1e-113	403	0	53	295	390	1118	0.901	0.753
AT1G15170	481	c42871.graph_c0	1921	1e-147	518	0	3	476	447	1871	0.706	0.529
AT1G15200	428	c42802.graph_c0	1948	2e-57	220	0	1	263	181	978	0.616	0.502
AT1G15215	252	c36832.graph_c0	1144	1e-61	233	0	14	243	344	964	0.654	0.491
AT1G15220	159	c49177.graph_c1	1798	4e-58	220	0	1	155	190	663	0.804	0.671
AT1G15230	155	c47023.graph_c0	2963	1e-18	89.7	0	1	125	150	602	0.556	0.424
AT1G15240	706	c44273.graph_c0	4254	1e-122	310	0	1	287	458	1312	0.681	0.552
AT1G15260	178	c50527.graph_c0	1007	9e-18	86.7	0	7	178	112	717	0.498	0.329
AT1G15290	1608	c43437.graph_c0	6021	0	1300	0	27	1095	338	3595	0.732	0.594
AT1G15320	289	c33081.graph_c0	1081	1e-45	180	0	41	273	367	1026	0.646	0.457
AT1G15340	332	c48188.graph_c1	2624	5e-19	92.4	0	5	56	126	281	0.865	0.712
AT1G15360	199	c37937.graph_c0	1201	2e-43	172	0	1	199	129	749	0.563	0.474
AT1G15370	147	c39986.graph_c0	1241	3e-68	254	0	1	147	661	1101	0.932	0.776
AT1G15385	73	c22278.graph_c0	700	4e-07	50.4	0	32	72	251	382	0.75	0.591
AT1G15390	269	c37386.graph_c0	2033	3e-32	99.8	0	80	137	295	468	0.914	0.81
AT1G15400	145	c43116.graph_c1	1845	6e-17	83.6	0	1	119	933	1199	0.55	0.45
AT1G15410	330	c38044.graph_c0	1680	9e-67	251	0	56	327	370	1188	0.633	0.478
AT1G15440	900	c47338.graph_c2	3195	0	1285	0	1	896	315	3029	0.804	0.688
AT1G15460	683	c44942.graph_c0	2774	0	939	0	13	671	183	2132	0.821	0.679
AT1G15490	648	c34244.graph_c0	2358	0	717	0	9	640	43	1953	0.72	0.588
AT1G15510	866	c43495.graph_c0	3650	0	1117	0	1	866	1024	3615	0.761	0.6
AT1G15520	1423	c46776.graph_c0	4911	0	1929	0	6	1423	268	4563	0.787	0.639
AT1G15550	358	c23505.graph_c0	1451	1e-107	384	0	23	353	234	1217	0.723	0.569
AT1G15660	705	c27410.graph_c0	2633	1e-39	162	0	15	705	280	2268	0.427	0.287
AT1G15690	770	c37859.graph_c0	3165	0	1268	0	6	770	760	3039	0.886	0.827
AT1G15710	358	c45758.graph_c0	2015	1e-118	420	0	30	340	767	1735	0.78	0.622
AT1G15720	390	c43906.graph_c0	1163	5e-16	82.8	0	2	188	158	709	0.503	0.309
AT1G15740	585	c44178.graph_c0	2345	1e-157	551	0	8	585	507	2246	0.701	0.573
AT1G15750	1131	c40209.graph_c0	5371	0	1921	0	1	1131	1139	4549	0.874	0.805
AT1G15780	1335	c49347.graph_c0	3488	1e-153	540	0	878	1332	618	1970	0.747	0.634
AT1G15820	258	c20951.graph_c0	1090	1e-101	365	0	27	258	135	827	0.888	0.815
AT1G15860	227	c36477.graph_c0	1552	1e-91	332	0	11	227	253	912	0.818	0.709
AT1G15870	242	c38824.graph_c0	1572	3e-50	195	0	39	241	663	1283	0.676	0.488
AT1G15880	223	c42574.graph_c1	1628	1e-101	364	0	1	223	411	1070	0.906	0.795
AT1G15910	634	c39490.graph_c0	2507	1e-169	497	0	22	525	191	1699	0.696	0.502
AT1G15930	144	c44616.graph_c0	1113	2e-49	191	0	23	144	318	683	0.861	0.746
AT1G15950	344	c46492.graph_c0	1484	1e-146	516	0	10	322	148	1086	0.837	0.786
AT1G15960	527	c47808.graph_c0	2843	1e-119	425	0	243	527	426	1271	0.87	0.716
AT1G15980	461	c35090.graph_c0	2598	1e-180	627	0	16	455	134	1480	0.804	0.682
AT1G16000	86	c37565.graph_c0	647	3e-10	60.8	0	20	67	100	243	0.667	0.542
AT1G16010	442	c45138.graph_c0	2146	0	647	0	1	438	666	1970	0.827	0.748
AT1G16040	226	c41767.graph_c0	2083	9e-43	170	0	2	192	403	1002	0.608	0.412
AT1G16070	397	c35806.graph_c0	1791	1e-104	377	0	73	397	359	1357	0.725	0.548
AT1G16080	313	c50056.graph_c0	1618	1e-120	428	0	68	313	478	1215	0.898	0.813
AT1G16120	730	c48200.graph_c0	2443	1e-106	382	0	396	704	395	1327	0.785	0.579
AT1G16180	412	c20904.graph_c0	1699	1e-169	593	0	20	412	331	1512	0.805	0.729
AT1G16210	234	c37828.graph_c0	1327	1e-53	206	0	1	226	190	873	0.711	0.553
AT1G16240	228	c27763.graph_c0	1259	8e-62	233	0	1	189	172	741	0.758	0.616
AT1G16280	491	c34476.graph_c0	2038	1e-159	557	0	16	459	315	1658	0.771	0.621
AT1G16290	419	c29431.graph_c0	298	6e-31	132	0	284	381	3	296	0.786	0.551
AT1G16300	420	c42558.graph_c0	1705	0	636	0	49	419	370	1482	0.887	0.819
AT1G16350	502	c47329.graph_c0	4797	0	687	0	4	502	2913	4400	0.812	0.681
AT1G16380	785	c52299.graph_c0	2256	1e-119	427	0	131	776	11	1942	0.58	0.37
AT1G16390	518	c44461.graph_c0	2054	1e-153	540	0	1	509	382	1920	0.687	0.531
AT1G16445	274	c29508.graph_c0	1275	9e-78	286	0	55	272	401	1051	0.8	0.609
AT1G16470	235	c50002.graph_c0	1280	1e-126	446	0	1	235	410	1114	0.962	0.923
AT1G16520	325	c35580.graph_c0	1592	1e-108	387	0	7	324	359	1336	0.759	0.607
AT1G16540	819	c49068.graph_c0	3567	0	991	0	2	818	452	2944	0.72	0.59
AT1G16560	287	c44503.graph_c0	1716	5e-95	333	0	61	274	551	1189	0.864	0.72
AT1G16570	465	c49186.graph_c0	2458	1e-177	619	0	1	458	451	1860	0.767	0.667
AT1G16590	215	c48348.graph_c0	2295	3e-54	208	0	16	200	1585	2133	0.726	0.538
AT1G16610	407	c48079.graph_c1	1716	1e-29	127	0	94	175	1063	1308	0.841	0.683
AT1G16630	845	c49060.graph_c0	2765	3e-23	107	0	39	244	1746	2501	0.478	0.353
AT1G16650	521	c32661.graph_c0	1766	1e-144	510	0	4	521	113	1654	0.652	0.51
AT1G16670	390	c26179.graph_c0	1954	1e-139	493	0	19	340	653	1612	0.839	0.742
AT1G16720	598	c37852.graph_c0	2391	0	816	0	100	598	587	2086	0.864	0.78
AT1G16730	202	c37867.graph_c0	1035	8e-23	103	0	34	157	469	888	0.607	0.436
AT1G16740	126	c35398.graph_c0	964	1e-54	208	0	1	110	217	546	0.955	0.909
AT1G16770	324	c32194.graph_c0	1319	1e-101	366	0	1	323	31	1014	0.675	0.59
AT1G16780	851	c25482.graph_c0	3252	0	1293	0	8	851	328	2850	0.826	0.761
AT1G16790	144	c27606.graph_c1	929	5e-23	103	0	24	139	372	716	0.632	0.419
AT1G16800	2127	c49278.graph_c0	8376	0	1120	0	950	2127	1444	4998	0.683	0.501
AT1G16810	144	c28405.graph_c0	938	4e-20	94	0	92	144	486	644	0.925	0.736
AT1G16840	161	c42392.graph_c0	1140	2e-22	102	0	40	137	402	695	0.663	0.525
AT1G16860	474	c28472.graph_c0	2322	0	729	0	1	474	508	1938	0.855	0.738
AT1G16870	480	c35065.graph_c0	1853	1e-164	575	0	101	479	378	1514	0.829	0.732
AT1G16880	290	c21252.graph_c0	1602	1e-105	377	0	38	290	394	1158	0.847	0.71
AT1G16970	621	c45896.graph_c0	2382	0	792	0	21	621	329	2137	0.806	0.619
AT1G17020	358	c48346.graph_c0	1529	1e-103	372	0	11	358	120	1145	0.693	0.506
AT1G17070	849	c49588.graph_c1	3345	0	827	0	1	841	538	3138	0.651	0.502
AT1G17080	154	c25867.graph_c0	1493	1e-25	112	0	7	152	398	811	0.548	0.473
AT1G17100	232	c25950.graph_c0	932	3e-78	288	0	34	231	173	757	0.798	0.677
AT1G17110	924	c42367.graph_c0	4244	1e-176	617	0	1	723	552	2630	0.581	0.468
AT1G17120	590	c46859.graph_c0	2107	0	445	0	270	587	988	1938	0.774	0.695
AT1G17130	331	c43724.graph_c0	1538	1e-103	373	0	1	278	602	1387	0.802	0.68
AT1G17160	379	c42524.graph_c0	1794	1e-128	457	0	55	376	488	1438	0.82	0.705
AT1G17180	221	c37710.graph_c0	790	1e-72	269	0	1	209	15	644	0.767	0.581
AT1G17200	135	c33280.graph_c0	1137	3e-40	160	0	15	133	401	754	0.773	0.664
AT1G17210	958	c41949.graph_c0	3880	0	965	0	74	956	889	3552	0.694	0.583
AT1G17220	1026	c43823.graph_c0	3935	0	1075	0	3	1010	603	3602	0.714	0.601
AT1G17280	237	c27910.graph_c0	1275	2e-89	325	0	1	236	298	1002	0.767	0.663
AT1G17330	222	c36310.graph_c0	870	1e-81	299	0	4	220	71	721	0.839	0.705
AT1G17350	236	c45292.graph_c0	2176	8e-49	190	0	106	226	282	620	0.81	0.744
AT1G17370	419	c36775.graph_c1	1672	0	669	0	24	418	297	1490	0.878	0.795
AT1G17410	144	c50821.graph_c0	899	9e-52	199	0	1	144	270	683	0.792	0.632
AT1G17420	919	c49417.graph_c3	3161	0	1252	0	1	919	304	3069	0.776	0.648
AT1G17440	683	c42472.graph_c1	2280	3e-57	220	0	485	683	465	1064	0.69	0.55
AT1G17450	1844	c44909.graph_c0	6010	0	772	0	1	1155	2341	5766	0.552	0.41
AT1G17500	1216	c48679.graph_c2	4008	0	1850	0	1	1207	324	3983	0.831	0.719
AT1G17520	296	c36500.graph_c0	1321	3e-49	192	0	1	295	56	886	0.565	0.395
AT1G17550	511	c46055.graph_c4	2483	1e-119	427	0	140	505	931	2046	0.729	0.582
AT1G17650	358	c40415.graph_c0	1591	1e-145	511	0	21	352	445	1434	0.867	0.75
AT1G17665	338	c45744.graph_c1	2527	2e-71	266	0	164	336	620	1138	0.844	0.751
AT1G17680	896	c47181.graph_c1	3631	2e-96	351	0	621	896	2803	3630	0.768	0.601
AT1G17720	500	c33188.graph_c1	2079	0	839	0	11	500	36	1541	0.879	0.803
AT1G17730	203	c48438.graph_c0	1405	1e-100	359	0	1	203	198	809	0.936	0.877
AT1G17745	624	c40279.graph_c0	2555	0	825	0	82	624	483	2111	0.838	0.753
AT1G17760	734	c36554.graph_c0	2728	0	1001	0	5	728	243	2441	0.782	0.647
AT1G17840	703	c38004.graph_c0	2433	0	1134	0	23	700	181	2226	0.884	0.805
AT1G17860	196	c53780.graph_c0	789	2e-45	179	0	1	195	136	753	0.643	0.469
AT1G17870	573	c44005.graph_c0	2248	0	770	0	1	571	277	1962	0.776	0.676
AT1G17890	320	c34815.graph_c0	1539	1e-161	563	0	3	319	299	1249	0.905	0.842
AT1G17950	249	c46111.graph_c0	1551	5e-51	197	0	3	111	969	1295	0.927	0.844
AT1G18010	459	c21276.graph_c0	2278	1e-161	566	0	8	429	191	1444	0.754	0.656
AT1G18040	391	c34489.graph_c1	2046	1e-173	603	0	6	391	580	1803	0.797	0.733
AT1G18060	226	c35779.graph_c0	1087	8e-80	293	0	48	226	300	833	0.872	0.771
AT1G18070	532	c42671.graph_c0	2787	0	773	0	1	532	906	2447	0.812	0.731
AT1G18080	327	c33662.graph_c0	1506	1e-164	574	0	1	327	201	1181	0.927	0.841
AT1G18100	173	c50413.graph_c0	953	8e-60	226	0	1	173	283	807	0.726	0.606
AT1G18170	247	c25580.graph_c0	1147	7e-66	247	0	61	247	236	784	0.807	0.636
AT1G18190	668	c36053.graph_c0	2206	7e-90	328	0	335	665	160	1158	0.681	0.519
AT1G18210	170	c34201.graph_c0	1085	3e-43	171	0	23	154	379	789	0.788	0.599
AT1G18260	678	c36679.graph_c0	671	3e-11	67.8	0	227	398	202	660	0.5	0.285
AT1G18265	280	c39139.graph_c0	1364	2e-09	60.5	0	187	280	706	999	0.541	0.347
AT1G18270	1373	c36325.graph_c0	4734	0	1803	0	4	1373	159	4271	0.796	0.653
AT1G18280	180	c53984.graph_c0	669	2e-12	69.3	0	38	114	56	286	0.628	0.436
AT1G18335	269	c46892.graph_c0	1986	8e-58	220	0	42	261	493	1263	0.598	0.483
AT1G18340	301	c48673.graph_c0	2599	7e-30	128	0	211	284	814	1044	0.883	0.753
AT1G18370	974	c49435.graph_c2	6272	0	1394	0	1	972	153	3056	0.817	0.729
AT1G18390	648	c37680.graph_c0	2570	1e-130	380	0	355	648	360	1319	0.738	0.609
AT1G18440	288	c28029.graph_c0	1338	4e-89	325	0	95	282	413	976	0.91	0.793
AT1G18450	441	c33178.graph_c0	1802	0	723	0	1	441	400	1734	0.857	0.761
AT1G18470	467	c43273.graph_c0	2127	0	686	0	1	467	439	1839	0.807	0.692
AT1G18480	391	c46494.graph_c0	3967	1e-131	467	0	11	391	432	1589	0.77	0.592
AT1G18500	631	c42707.graph_c1	2404	0	882	0	77	619	441	2063	0.891	0.768
AT1G18530	157	c38687.graph_c0	1067	9e-57	216	0	1	156	300	767	0.788	0.679
AT1G18540	233	c42858.graph_c0	1394	4e-86	314	0	1	233	639	1337	0.76	0.674
AT1G18550	725	c48116.graph_c0	2580	0	762	0	16	715	32	2386	0.637	0.543
AT1G18560	690	c46862.graph_c0	2744	0	860	0	1	676	222	2234	0.77	0.588
AT1G18580	537	c44486.graph_c0	2443	0	822	0	16	537	399	1955	0.852	0.745
AT1G18600	336	c34557.graph_c1	1888	2e-41	167	0	27	238	241	864	0.547	0.426
AT1G18610	556	c40587.graph_c0	2184	1e-160	561	0	1	451	228	1580	0.724	0.588
AT1G18640	295	c43789.graph_c0	1585	1e-112	402	0	37	295	274	1050	0.834	0.737
AT1G18650	184	c40171.graph_c0	1403	2e-29	125	0	1	108	769	1095	0.734	0.523
AT1G18660	486	c20888.graph_c0	2148	1e-165	578	0	14	486	261	1682	0.762	0.615
AT1G18670	709	c47472.graph_c0	3633	0	866	0	1	706	1292	3331	0.743	0.632
AT1G18680	186	c43509.graph_c0	1147	5e-57	123	0	99	185	440	697	0.828	0.655
AT1G18700	700	c42254.graph_c0	2521	1e-174	607	0	1	700	287	2392	0.638	0.445
AT1G18720	206	c38066.graph_c0	1194	6e-69	257	0	2	202	390	941	0.761	0.607
AT1G18730	138	c36989.graph_c0	899	4e-34	140	0	24	136	202	525	0.735	0.611
AT1G18740	382	c47332.graph_c1	2130	1e-129	457	0	1	382	563	1717	0.734	0.575
AT1G18750	389	c28863.graph_c0	732	3e-57	219	0	1	137	307	717	0.883	0.759
AT1G18760	224	c39366.graph_c1	609	6e-12	67.8	0	175	221	368	508	0.723	0.532
AT1G18800	256	c37370.graph_c0	1859	8e-92	333	0	1	221	405	1082	0.832	0.748
AT1G18810	387	c43891.graph_c0	1527	7e-18	89	0	116	352	229	996	0.436	0.309
AT1G18835	88	c43997.graph_c0	1361	1e-26	115	0	1	84	757	1017	0.759	0.644
AT1G18850	399	c37912.graph_c0	1566	2e-91	333	0	1	393	193	1386	0.648	0.475
AT1G18890	545	c34863.graph_c0	2419	0	837	0	1	545	153	1769	0.831	0.741
AT1G18900	860	c37189.graph_c0	3381	0	1069	0	1	860	163	2820	0.716	0.593
AT1G18910	1254	c47079.graph_c0	4093	0	951	0	41	1254	134	3730	0.594	0.435
AT1G18950	750	c45876.graph_c1	4897	1e-176	615	0	113	745	2369	4240	0.634	0.532
AT1G18980	220	c21549.graph_c0	835	9e-59	223	0	35	218	183	740	0.769	0.575
AT1G19010	319	c40372.graph_c0	2057	1e-33	140	0	1	196	97	711	0.584	0.425
AT1G19020	86	c26407.graph_c0	660	2e-09	57.8	0	4	85	146	385	0.549	0.415
AT1G19025	549	c48066.graph_c0	3977	1e-142	503	0	1	462	1754	3088	0.687	0.552
AT1G19100	663	c47165.graph_c0	2763	0	715	0	41	657	130	2037	0.703	0.569
AT1G19110	754	c42890.graph_c0	2885	0	814	0	3	754	435	2693	0.683	0.52
AT1G19130	192	c46232.graph_c0	3298	2e-61	231	0	47	189	2367	2795	0.868	0.75
AT1G19140	311	c47175.graph_c1	1672	5e-99	357	0	1	300	108	1073	0.675	0.563
AT1G19170	506	c27741.graph_c0	2208	0	704	0	8	506	443	1900	0.804	0.675
AT1G19180	187	c20950.graph_c0	1238	6e-20	94.4	0	54	183	335	772	0.533	0.427
AT1G19210	185	c29977.graph_c0	1170	9e-39	156	0	11	185	228	848	0.578	0.483
AT1G19220	1086	c46057.graph_c1	2399	0	731	0	1	474	734	2152	0.846	0.757
AT1G19230	926	c47827.graph_c0	3583	0	1134	0	16	926	355	3084	0.738	0.601
AT1G19250	530	c39954.graph_c0	1869	1e-113	405	0	12	518	131	1672	0.607	0.416
AT1G19260	769	c49539.graph_c0	4850	0	475	0	264	769	52	1572	0.678	0.484
AT1G19290	904	c44568.graph_c0	4446	0	798	0	12	901	24	2735	0.643	0.457
AT1G19300	351	c45550.graph_c0	2250	1e-131	466	0	27	351	895	1887	0.795	0.729
AT1G19340	414	c46422.graph_c0	2808	2e-36	150	0	7	215	2012	2704	0.541	0.416
AT1G19360	428	c48646.graph_c0	2867	1e-170	596	0	60	428	446	1546	0.873	0.756
AT1G19400	303	c40466.graph_c0	2300	2e-66	249	0	26	264	772	1494	0.681	0.552
AT1G19440	516	c27427.graph_c0	2152	0	822	0	21	490	1	1410	0.906	0.819
AT1G19485	815	c48383.graph_c5	3841	1e-141	501	0	253	815	530	2314	0.608	0.47
AT1G19520	725	c36256.graph_c0	2777	1e-176	617	0	98	721	442	2304	0.678	0.503
AT1G19530	117	c33367.graph_c0	859	2e-11	64.7	0	1	112	381	779	0.489	0.324
AT1G19580	220	c26524.graph_c0	1496	3e-92	334	0	1	179	248	784	0.944	0.877
AT1G19600	355	c43230.graph_c0	1996	1e-136	481	0	13	354	439	1500	0.816	0.658
AT1G19630	476	c48554.graph_c1	2138	1e-155	347	0	18	314	958	1899	0.729	0.538
AT1G19640	389	c46065.graph_c0	1550	1e-76	283	0	1	387	197	1357	0.587	0.411
AT1G19670	324	c28836.graph_c0	623	7e-41	164	0	58	249	52	621	0.633	0.469
AT1G19715	601	c40367.graph_c1	3542	1e-154	544	0	10	601	411	2237	0.639	0.488
AT1G19720	894	c40161.graph_c0	3454	0	897	0	34	894	232	2817	0.685	0.517
AT1G19800	350	c23233.graph_c0	1750	1e-122	437	0	79	350	274	1089	0.879	0.779
AT1G19835	982	c47480.graph_c0	5948	0	793	0	33	982	563	3691	0.604	0.473
AT1G19850	902	c47548.graph_c1	2953	0	934	0	57	894	3	2474	0.688	0.585
AT1G19860	413	c47792.graph_c0	2824	3e-72	269	0	16	413	820	2121	0.523	0.392
AT1G19870	794	c44205.graph_c0	3512	7e-57	219	0	1	566	315	2228	0.475	0.324
AT1G19880	538	c41709.graph_c0	2261	0	692	0	19	422	811	2004	0.891	0.797
AT1G19910	165	c41361.graph_c0	1422	1e-57	219	0	1	165	211	705	0.739	0.715
AT1G19920	476	c34688.graph_c0	2055	0	760	0	57	476	445	1704	0.933	0.838
AT1G19980	342	c47755.graph_c1	1907	1e-44	177	0	12	270	93	926	0.601	0.396
AT1G20030	299	c35587.graph_c0	1712	1e-105	379	0	4	285	335	1177	0.774	0.668
AT1G20050	223	c45361.graph_c0	1199	9e-65	243	0	1	204	359	976	0.699	0.592
AT1G20060	970	c30235.graph_c0	3079	2e-99	361	0	50	596	197	1750	0.584	0.416
AT1G20080	537	c37814.graph_c0	2511	0	734	0	1	536	527	2140	0.786	0.652
AT1G20110	601	c48446.graph_c1	6931	1e-145	512	0	205	601	5033	6193	0.721	0.649
AT1G20160	730	c37490.graph_c0	3322	0	844	0	15	723	407	2551	0.748	0.578
AT1G20180	390	c51813.graph_c0	1218	6e-56	215	0	91	385	273	1157	0.609	0.408
AT1G20190	252	c35467.graph_c0	1445	1e-101	365	0	1	252	220	966	0.782	0.69
AT1G20200	488	c37945.graph_c0	2081	0	701	0	1	488	396	1859	0.81	0.724
AT1G20230	760	c40467.graph_c1	3414	0	858	0	33	760	944	3127	0.749	0.558
AT1G20270	287	c42387.graph_c0	2043	1e-117	417	0	43	287	921	1658	0.894	0.785
AT1G20300	537	c28370.graph_c0	1813	0	673	0	1	537	36	1646	0.752	0.608
AT1G20340	167	c26071.graph_c0	944	9e-55	209	0	1	167	253	759	0.728	0.633
AT1G20370	549	c47170.graph_c0	1877	2e-79	293	0	257	491	34	777	0.745	0.574
AT1G20410	504	c38395.graph_c0	2041	1e-148	523	0	20	501	142	1677	0.68	0.539
AT1G20450	260	c20973.graph_c0	1554	6e-11	65.1	0	170	246	530	748	0.705	0.5
AT1G20540	351	c28280.graph_c0	1874	1e-167	585	0	1	350	631	1680	0.883	0.78
AT1G20560	556	c39611.graph_c0	1994	0	773	0	3	556	222	1886	0.791	0.645
AT1G20575	246	c21147.graph_c0	1144	1e-122	433	0	1	246	184	912	0.927	0.837
AT1G20580	131	c21047.graph_c0	935	2e-51	197	0	1	101	159	461	1	0.881
AT1G20610	429	c45010.graph_c0	1969	1e-141	499	0	1	429	214	1512	0.735	0.573
AT1G20640	844	c43648.graph_c0	4223	1e-158	304	0	273	580	1555	2493	0.635	0.498
AT1G20670	652	c21133.graph_c1	2373	2e-81	301	0	112	497	44	1237	0.599	0.443
AT1G20696	140	c25987.graph_c0	1472	2e-32	134	0	1	110	260	595	0.723	0.616
AT1G20720	1175	c44804.graph_c0	3019	0	1050	0	15	793	502	2844	0.792	0.637
AT1G20760	1019	c45487.graph_c0	3854	1e-176	617	0	266	1019	424	2511	0.584	0.498
AT1G20780	801	c26021.graph_c0	2956	0	872	0	20	799	327	2681	0.741	0.572
AT1G20810	232	c48185.graph_c0	4374	5e-58	221	0	90	228	2725	3141	0.892	0.827
AT1G20830	349	c27055.graph_c0	1601	1e-93	340	0	93	338	385	1122	0.79	0.661
AT1G20850	356	c26208.graph_c0	1583	1e-145	511	0	31	356	280	1254	0.848	0.738
AT1G20860	534	c47203.graph_c0	1943	1e-163	572	0	1	528	259	1839	0.693	0.558
AT1G20920	828	c42442.graph_c0	4718	0	1096	0	1	828	1743	4166	0.764	0.68
AT1G20925	472	c42600.graph_c1	1743	5e-89	325	0	88	472	108	1328	0.678	0.442
AT1G20930	315	c36878.graph_c0	1376	1e-155	545	0	7	315	87	1010	0.916	0.835
AT1G20960	2171	c48365.graph_c0	8006	0	3473	0	1	2161	54	6545	0.871	0.775
AT1G20970	1364	c45668.graph_c1	4701	1e-86	319	0	756	1088	1012	2010	0.682	0.468
AT1G20980	1035	c45391.graph_c0	4809	0	809	0	1	1035	509	3835	0.58	0.438
AT1G20990	319	c40721.graph_c0	1292	3e-57	219	0	54	270	336	977	0.643	0.498
AT1G21065	217	c49891.graph_c0	1360	6e-71	264	0	51	217	704	1201	0.856	0.766
AT1G21080	391	c43317.graph_c0	1871	1e-150	476	0	1	285	217	1077	0.906	0.808
AT1G21090	242	c25401.graph_c0	1286	6e-51	197	0	30	232	381	983	0.624	0.519
AT1G21140	200	c38742.graph_c0	727	8e-69	256	0	10	192	1	588	0.791	0.673
AT1G21200	443	c43375.graph_c0	2602	2e-52	204	0	83	246	1235	1729	0.759	0.578
AT1G21240	741	c48925.graph_c0	2897	1e-151	533	0	8	728	119	2308	0.581	0.408
AT1G21320	421	c44450.graph_c0	1529	2e-48	190	0	206	409	638	1237	0.676	0.527
AT1G21326	239	c32829.graph_c0	411	3e-10	62.8	0	3	87	35	268	0.553	0.447
AT1G21350	225	c46417.graph_c0	1346	9e-71	192	0	118	224	410	730	0.897	0.832
AT1G21370	342	c44618.graph_c0	3523	2e-60	229	0	195	341	2935	3375	0.85	0.755
AT1G21380	506	c42877.graph_c0	2278	1e-108	389	0	15	485	364	1875	0.614	0.446
AT1G21410	360	c43083.graph_c1	2594	1e-140	495	0	19	357	1111	2124	0.823	0.705
AT1G21440	336	c48502.graph_c1	1467	1e-102	368	0	40	328	395	1252	0.772	0.606
AT1G21450	593	c40607.graph_c0	2565	1e-173	607	0	15	593	334	1995	0.691	0.551
AT1G21460	247	c21287.graph_c0	1102	3e-98	354	0	1	246	102	845	0.827	0.703
AT1G21480	462	c46084.graph_c0	1888	0	694	0	1	462	290	1756	0.782	0.681
AT1G21500	126	c30469.graph_c0	788	2e-07	52	0	81	117	443	553	0.838	0.676
AT1G21510	323	c20619.graph_c0	1235	3e-06	49.7	0	111	323	232	870	0.44	0.286
AT1G21550	155	c35985.graph_c0	685	6e-28	120	0	4	153	134	580	0.66	0.447
AT1G21580	2166	c48395.graph_c2	4860	5e-51	201	0	1362	1867	2948	4420	0.481	0.333
AT1G21630	1218	c48691.graph_c0	4810	1e-145	513	0	421	1210	1219	3249	0.552	0.43
AT1G21640	985	c43194.graph_c0	3714	0	726	0	41	783	937	3240	0.642	0.496
AT1G21650	1805	c46957.graph_c0	4132	0	939	0	804	1359	261	1916	0.899	0.818
AT1G21680	706	c41787.graph_c0	2642	0	829	0	33	694	269	2308	0.745	0.625
AT1G21690	339	c42132.graph_c0	1491	1e-149	523	0	18	339	272	1234	0.885	0.78
AT1G21700	807	c37563.graph_c0	2980	0	661	0	72	793	549	2618	0.667	0.542
AT1G21710	365	c45554.graph_c0	1828	1e-112	402	0	28	355	232	1263	0.726	0.594
AT1G21720	204	c26700.graph_c0	1200	1e-109	390	0	1	204	357	968	0.956	0.897
AT1G21730	890	c33406.graph_c0	4020	0	893	0	71	888	1135	3717	0.691	0.58
AT1G21740	953	c46184.graph_c0	1770	1e-144	436	0	610	945	412	1419	0.799	0.605
AT1G21750	501	c41603.graph_c0	2031	0	655	0	1	482	472	1926	0.796	0.644
AT1G21760	328	c47067.graph_c1	2324	5e-98	354	0	1	221	162	824	0.857	0.74
AT1G21780	326	c37121.graph_c0	1636	1e-143	503	0	1	326	122	1099	0.85	0.715
AT1G21790	288	c43646.graph_c0	1485	1e-102	368	0	18	280	494	1282	0.814	0.684
AT1G21830	206	c39627.graph_c0	1141	3e-18	89	0	2	169	363	968	0.414	0.33
AT1G21840	240	c42570.graph_c0	2228	2e-89	325	0	1	240	361	1098	0.793	0.614
AT1G21880	316	c33862.graph_c0	1576	1e-131	464	0	30	315	436	1293	0.899	0.773
AT1G21910	230	c28654.graph_c0	601	3e-20	95.9	0	52	133	325	579	0.682	0.682
AT1G21920	417	c37257.graph_c0	2002	1e-108	388	0	95	414	587	1606	0.676	0.594
AT1G21980	752	c45548.graph_c0	3204	0	1057	0	27	751	729	2936	0.816	0.717
AT1G22030	333	c40804.graph_c0	1929	3e-75	279	0	1	333	415	1440	0.593	0.464
AT1G22040	475	c37742.graph_c0	2076	1e-143	504	0	38	475	382	1698	0.71	0.571
AT1G22060	1999	c48225.graph_c0	6470	0	848	0	1	1299	2135	6091	0.582	0.393
AT1G22130	335	c44414.graph_c0	2193	8e-27	118	0	1	71	237	458	0.865	0.811
AT1G22140	64	c50197.graph_c0	670	2e-06	48.5	0	15	50	423	530	0.833	0.639
AT1G22150	656	c40713.graph_c0	2654	0	940	0	8	655	424	2385	0.797	0.694
AT1G22170	334	c37406.graph_c0	1878	1e-139	492	0	47	327	447	1289	0.922	0.815
AT1G22260	871	c41313.graph_c0	2588	1e-104	264	0	193	694	984	2576	0.561	0.348
AT1G22360	481	c45537.graph_c0	1923	1e-162	567	0	1	479	327	1784	0.724	0.545
AT1G22410	527	c42185.graph_c0	2096	0	843	0	74	526	244	1602	0.938	0.865
AT1G22430	388	c45249.graph_c0	1789	1e-134	475	0	11	387	520	1644	0.764	0.607
AT1G22450	191	c36386.graph_c0	1478	3e-40	161	0	116	190	772	996	0.973	0.893
AT1G22460	565	c49179.graph_c0	3705	1e-165	578	0	179	558	531	1793	0.8	0.651
AT1G22470	146	c28455.graph_c0	922	4e-06	47.4	0	41	62	185	250	0.955	0.818
AT1G22540	557	c48828.graph_c0	2423	0	643	0	19	553	203	1828	0.727	0.577
AT1G22610	1029	c47552.graph_c0	5896	0	1442	0	1	1029	2454	5534	0.789	0.682
AT1G22620	912	c48227.graph_c0	3332	0	1075	0	16	657	226	2136	0.884	0.787
AT1G22630	110	c42974.graph_c0	647	1e-21	98.6	0	35	110	222	452	0.727	0.649
AT1G22660	605	c48934.graph_c0	2809	2e-76	249	0	238	483	1077	1781	0.671	0.52
AT1G22700	296	c35389.graph_c0	1391	1e-81	300	0	100	295	541	1125	0.837	0.76
AT1G22710	512	c21123.graph_c0	2010	0	637	0	14	512	161	1678	0.762	0.63
AT1G22750	247	c43760.graph_c0	1472	4e-65	244	0	7	243	145	846	0.705	0.511
AT1G22760	660	c20430.graph_c0	2262	1e-179	627	0	45	651	249	2078	0.688	0.544
AT1G22770	1173	c35573.graph_c0	4663	0	1599	0	7	1171	564	4079	0.785	0.687
AT1G22790	216	c20820.graph_c0	1407	7e-37	150	0	1	216	197	814	0.56	0.435
AT1G22800	355	c43687.graph_c0	1757	2e-61	233	0	1	201	109	669	0.746	0.612
AT1G22840	114	c21235.graph_c0	897	7e-53	202	0	1	111	240	572	0.901	0.865
AT1G22850	344	c25632.graph_c0	1601	7e-78	288	0	37	300	416	1216	0.697	0.629
AT1G22860	961	c43528.graph_c0	4599	0	520	0	2	559	233	1984	0.66	0.488
AT1G22870	913	c48513.graph_c1	6105	0	1145	0	1	913	238	2994	0.745	0.633
AT1G22930	1020	c48213.graph_c0	4178	0	858	0	1	1017	734	3904	0.631	0.473
AT1G22940	522	c46342.graph_c0	1998	0	719	0	14	518	115	1650	0.815	0.698
AT1G23000	358	c42357.graph_c1	647	2e-31	133	0	1	78	97	330	0.897	0.795
AT1G23100	97	c33213.graph_c0	723	4e-39	156	0	1	97	293	583	0.907	0.763
AT1G23110	248	c28211.graph_c0	1583	2e-88	322	0	9	248	394	1113	0.804	0.667
AT1G23180	834	c48837.graph_c0	3185	0	722	0	107	834	489	2705	0.685	0.538
AT1G23190	583	c49896.graph_c0	2513	0	1004	0	3	583	137	1876	0.898	0.818
AT1G23200	554	c47214.graph_c0	2129	1e-145	514	0	35	554	142	1680	0.642	0.514
AT1G23220	129	c35316.graph_c0	922	8e-45	175	0	1	128	247	633	0.752	0.659
AT1G23230	1592	c45481.graph_c0	5279	0	2157	0	1	1582	394	5163	0.789	0.67
AT1G23280	303	c39725.graph_c0	1556	6e-87	317	0	1	190	660	1226	0.874	0.789
AT1G23290	146	c21143.graph_c0	939	2e-65	244	0	5	146	184	612	0.916	0.846
AT1G23360	261	c41458.graph_c0	1401	5e-46	181	0	24	175	737	1279	0.663	0.519
AT1G23380	327	c35386.graph_c0	1604	2e-97	352	0	1	327	280	1290	0.663	0.529
AT1G23390	394	c43981.graph_c0	1561	3e-58	223	0	18	385	305	1381	0.562	0.359
AT1G23400	564	c35097.graph_c0	2031	1e-150	530	0	61	561	207	1769	0.637	0.541
AT1G23420	231	c57607.graph_c0	935	4e-52	201	0	7	224	47	718	0.621	0.478
AT1G23460	460	c49677.graph_c2	6183	1e-158	478	0	115	460	4834	5892	0.771	0.654
AT1G23710	295	c42842.graph_c0	1128	1e-24	110	0	68	203	57	488	0.567	0.46
AT1G23740	386	c25772.graph_c0	1491	1e-128	454	0	73	385	270	1208	0.859	0.751
AT1G23780	475	c46365.graph_c1	1979	1e-42	171	0	41	440	478	1938	0.459	0.301
AT1G23790	518	c44527.graph_c0	2422	1e-149	526	0	1	518	243	2030	0.628	0.503
AT1G23800	534	c42843.graph_c0	2255	0	873	0	27	534	324	1844	0.898	0.797
AT1G23820	378	c41696.graph_c0	2806	1e-153	538	0	50	377	464	1492	0.858	0.762
AT1G23840	338	c40497.graph_c0	1407	4e-19	92.8	0	202	335	235	615	0.604	0.381
AT1G23850	354	c36905.graph_c0	1719	3e-26	116	0	61	342	613	1383	0.485	0.322
AT1G23870	867	c48068.graph_c0	5112	0	1325	0	1	865	1469	4033	0.845	0.724
AT1G23890	261	c37835.graph_c0	1509	2e-58	222	0	22	229	717	1337	0.74	0.524
AT1G23965	117	c35493.graph_c0	747	2e-08	55.1	0	65	115	291	443	0.725	0.49
AT1G24020	155	c44879.graph_c0	1007	4e-34	140	0	1	151	428	883	0.664	0.454
AT1G24040	319	c45313.graph_c0	2616	6e-77	284	0	79	318	419	1135	0.738	0.588
AT1G24050	188	c26399.graph_c0	1154	6e-47	184	0	16	188	191	703	0.717	0.532
AT1G24090	353	c33903.graph_c0	1755	4e-90	328	0	15	351	189	1193	0.667	0.522
AT1G24100	460	c36486.graph_c0	2563	1e-110	397	0	11	458	1116	2441	0.633	0.462
AT1G24120	436	c44394.graph_c0	2085	1e-152	534	0	1	436	342	1607	0.728	0.629
AT1G24130	415	c46223.graph_c0	1499	1e-117	419	0	53	412	203	1279	0.719	0.598
AT1G24160	540	c41389.graph_c0	2474	8e-30	129	0	30	189	1779	2273	0.603	0.477
AT1G24180	393	c43773.graph_c1	1833	1e-177	619	0	1	393	553	1740	0.859	0.733
AT1G24190	1326	c47462.graph_c0	5321	0	1307	0	1	1299	929	4858	0.679	0.539
AT1G24267	344	c38593.graph_c0	1284	3e-38	156	0	35	316	1	840	0.51	0.388
AT1G24290	525	c45048.graph_c0	2167	0	643	0	1	511	259	1851	0.727	0.621
AT1G24300	1495	c47109.graph_c0	5348	2e-76	285	0	1	337	4031	5086	0.594	0.452
AT1G24310	377	c41142.graph_c0	1372	1e-117	418	0	110	376	71	871	0.865	0.734
AT1G24330	771	c27949.graph_c0	3047	0	956	0	1	767	306	2663	0.768	0.618
AT1G24340	709	c63273.graph_c0	586	1e-10	66.2	0	375	440	2	205	0.603	0.485
AT1G24350	147	c38448.graph_c0	1230	2e-58	221	0	19	145	344	724	0.898	0.827
AT1G24360	319	c45821.graph_c0	2308	6e-94	341	0	21	319	168	1022	0.699	0.592
AT1G24440	251	c36524.graph_c0	1425	8e-80	293	0	1	251	262	1011	0.704	0.593
AT1G24450	191	c46548.graph_c0	1163	2e-25	112	0	42	135	248	529	0.723	0.596
AT1G24460	1807	c48308.graph_c0	6269	1e-156	549	0	6	1601	1341	5834	0.503	0.303
AT1G24470	312	c39331.graph_c0	1270	6e-94	341	0	35	300	140	946	0.788	0.602
AT1G24480	239	c48529.graph_c0	1936	1e-86	316	0	37	230	692	1273	0.866	0.763
AT1G24490	499	c43344.graph_c0	2539	1e-134	476	0	44	475	385	1752	0.685	0.569
AT1G24510	535	c21061.graph_c0	2095	0	1015	0	1	535	271	1875	0.966	0.908
AT1G24530	418	c43026.graph_c0	1676	1e-110	394	0	101	405	341	1279	0.765	0.635
AT1G24540	522	c42607.graph_c0	1925	1e-178	622	0	11	520	153	1697	0.76	0.569
AT1G24560	678	c42490.graph_c0	2694	0	684	0	1	676	280	2304	0.717	0.538
AT1G24610	476	c27766.graph_c0	1837	1e-154	540	0	4	470	312	1739	0.733	0.525
AT1G24620	186	c51248.graph_c0	809	4e-52	201	0	33	181	185	631	0.805	0.658
AT1G24706	1804	c45035.graph_c0	8238	0	1143	0	672	1785	752	4234	0.651	0.535
AT1G24764	634	c21166.graph_c0	2921	0	689	0	64	634	660	2357	0.747	0.656
AT1G25145	326	c47960.graph_c2	1355	1e-103	371	0	26	324	47	943	0.742	0.589
AT1G25220	276	c37221.graph_c0	1233	4e-94	341	0	74	270	304	891	0.909	0.782
AT1G25240	376	c28829.graph_c0	1735	6e-69	258	0	2	332	214	1296	0.583	0.387
AT1G25260	235	c35357.graph_c0	1213	1e-88	323	0	1	235	143	829	0.809	0.677
AT1G25270	355	c42847.graph_c0	1826	3e-73	272	0	1	324	604	1575	0.627	0.423
AT1G25290	336	c39551.graph_c0	1864	3e-31	132	0	140	240	779	1081	0.851	0.653
AT1G25350	795	c44207.graph_c0	2981	0	1227	0	7	795	346	2706	0.842	0.743
AT1G25360	790	c48119.graph_c0	3374	0	977	0	3	790	830	3220	0.759	0.575
AT1G25375	524	c45140.graph_c0	2137	1e-145	512	0	1	472	135	1562	0.676	0.548
AT1G25380	363	c46753.graph_c1	1856	1e-100	361	0	33	319	524	1414	0.734	0.593
AT1G25420	323	c34805.graph_c0	1594	4e-91	332	0	1	228	182	862	0.82	0.675
AT1G25480	548	c42257.graph_c2	2858	1e-153	538	0	42	541	611	2131	0.661	0.555
AT1G25500	432	c47393.graph_c1	2049	1e-157	306	0	243	429	920	1477	0.866	0.813
AT1G25530	440	c45261.graph_c0	2047	0	636	0	1	440	382	1689	0.816	0.693
AT1G25540	836	c41590.graph_c0	2991	0	719	0	6	679	780	2798	0.702	0.564
AT1G25550	344	c46626.graph_c0	1728	3e-73	272	0	9	309	293	1321	0.585	0.487
AT1G25570	628	c47632.graph_c1	2278	0	693	0	27	624	468	2270	0.698	0.59
AT1G25580	449	c42115.graph_c0	2619	1e-101	364	0	1	280	156	989	0.74	0.653
AT1G25682	310	c35031.graph_c0	1545	1e-107	385	0	4	290	168	1034	0.761	0.678
AT1G26090	455	c43822.graph_c0	1866	1e-127	451	0	31	455	268	1611	0.653	0.509
AT1G26100	236	c55833.graph_c0	1034	3e-76	281	0	7	229	175	876	0.739	0.611
AT1G26110	611	c40741.graph_c0	2588	1e-128	457	0	1	553	610	2247	0.616	0.518
AT1G26120	476	c37436.graph_c0	1773	1e-153	537	0	19	476	237	1544	0.713	0.603
AT1G26160	258	c39446.graph_c0	1414	8e-92	333	0	24	258	179	919	0.781	0.696
AT1G26170	1022	c45503.graph_c0	3798	0	1316	0	3	1022	230	3295	0.767	0.616
AT1G26190	674	c44383.graph_c0	2998	0	928	0	1	612	783	2606	0.847	0.743
AT1G26220	197	c47725.graph_c0	1191	6e-69	257	0	5	197	517	1077	0.762	0.668
AT1G26340	135	c26805.graph_c0	893	5e-39	156	0	1	134	372	758	0.731	0.575
AT1G26370	717	c47549.graph_c2	2960	0	1017	0	1	713	660	2768	0.812	0.682
AT1G26390	530	c24837.graph_c0	1893	1e-147	518	0	26	525	89	1573	0.683	0.494
AT1G26460	630	c37692.graph_c0	2477	0	778	0	5	622	486	2294	0.792	0.625
AT1G26480	268	c42378.graph_c0	1363	1e-128	455	0	7	265	171	932	0.919	0.846
AT1G26500	505	c46525.graph_c0	1804	1e-144	508	0	141	500	696	1775	0.822	0.661
AT1G26520	374	c44452.graph_c0	1715	1e-147	517	0	10	373	56	1231	0.76	0.658
AT1G26550	142	c37978.graph_c0	977	7e-50	192	0	37	141	263	577	0.914	0.8
AT1G26560	510	c46338.graph_c0	2082	0	566	0	27	369	406	1437	0.866	0.741
AT1G26580	493	c37821.graph_c0	2316	3e-65	246	0	1	491	418	1929	0.485	0.342
AT1G26600	120	c39152.graph_c0	1269	2e-08	54.7	0	56	120	786	968	0.569	0.492
AT1G26610	455	c34924.graph_c0	914	4e-23	106	0	177	429	5	880	0.438	0.34
AT1G26640	332	c47097.graph_c1	2021	5e-60	228	0	97	241	1534	1980	0.881	0.735
AT1G26660	152	c43279.graph_c0	972	8e-46	179	0	1	143	330	758	0.776	0.608
AT1G26665	189	c35912.graph_c0	2200	9e-75	276	0	1	189	1558	2121	0.837	0.721
AT1G26670	222	c43147.graph_c0	1353	2e-73	272	0	1	222	460	1125	0.748	0.608
AT1G26690	214	c21100.graph_c0	1010	4e-75	278	0	1	214	240	872	0.762	0.598
AT1G26740	134	c37568.graph_c0	894	2e-28	121	0	1	134	305	682	0.628	0.496
AT1G26750	195	c35142.graph_c0	1026	2e-52	202	0	1	185	331	885	0.724	0.519
AT1G26760	545	c37197.graph_c0	1897	1e-167	584	0	18	521	316	1809	0.738	0.563
AT1G26761	444	c47347.graph_c0	2899	1e-119	426	0	66	444	1763	2875	0.721	0.589
AT1G26770	249	c49902.graph_c0	1508	1e-84	309	0	6	249	528	1232	0.725	0.668
AT1G26800	204	c25445.graph_c0	1210	8e-39	157	0	22	185	538	1041	0.663	0.512
AT1G26810	643	c41964.graph_c0	2659	0	798	0	1	640	362	2281	0.749	0.593
AT1G26830	732	c37530.graph_c0	2927	0	1296	0	1	732	517	2715	0.921	0.832
AT1G26840	284	c51136.graph_c0	1245	5e-98	354	0	1	282	304	1164	0.763	0.617
AT1G26850	616	c40212.graph_c0	3175	0	1031	0	7	616	637	2451	0.871	0.788
AT1G26910	221	c36954.graph_c0	1436	1e-113	404	0	1	220	84	743	0.914	0.873
AT1G26920	173	c43938.graph_c0	1277	8e-14	73.6	0	7	173	127	675	0.479	0.366
AT1G26940	226	c42930.graph_c0	1182	1e-99	359	0	5	226	108	773	0.856	0.757
AT1G26945	94	c22560.graph_c0	789	2e-25	111	0	24	92	201	407	0.899	0.812
AT1G27050	205	c44588.graph_c0	1607	3e-16	82	0	1	114	1094	1423	0.64	0.509
AT1G27070	532	c49072.graph_c0	3371	7e-74	275	0	70	512	1449	2828	0.539	0.376
AT1G27090	420	c21231.graph_c0	2013	1e-88	323	0	1	315	830	1864	0.665	0.527
AT1G27150	468	c44600.graph_c0	1961	1e-154	540	0	2	468	188	1585	0.754	0.593
AT1G27170	1384	c44449.graph_c0	4572	0	1010	0	11	1363	383	4414	0.62	0.428
AT1G27190	601	c38012.graph_c0	2390	0	673	0	24	600	283	2010	0.718	0.57
AT1G27200	575	c47455.graph_c0	4237	1e-147	519	0	54	574	599	2344	0.625	0.48
AT1G27210	625	c36798.graph_c0	3756	2e-78	291	0	34	566	378	1976	0.552	0.393
AT1G27290	142	c42174.graph_c0	1585	1e-17	85.5	0	1	128	413	793	0.539	0.406
AT1G27300	200	c39820.graph_c0	966	2e-10	62.4	0	108	157	445	594	0.7	0.54
AT1G27320	1036	c44384.graph_c0	4360	0	1337	0	1	1029	707	3760	0.755	0.646
AT1G27330	68	c39927.graph_c0	838	3e-29	124	0	1	68	477	680	0.926	0.882
AT1G27340	467	c35228.graph_c0	2348	1e-165	578	0	1	465	560	1921	0.732	0.592
AT1G27385	202	c27847.graph_c0	951	2e-65	245	0	1	202	271	846	0.754	0.621
AT1G27390	210	c35462.graph_c0	1132	1e-59	226	0	5	210	346	948	0.686	0.531
AT1G27410	422	c22323.graph_c0	2162	1e-123	439	0	1	373	142	1251	0.707	0.572
AT1G27435	81	c35756.graph_c0	848	1e-24	108	0	3	70	399	590	0.853	0.779
AT1G27450	183	c42090.graph_c1	1377	4e-83	303	0	1	182	393	938	0.918	0.808
AT1G27460	694	c40915.graph_c0	3141	0	743	0	1	694	381	2537	0.699	0.534
AT1G27461	354	c20225.graph_c0	1329	1e-48	191	0	1	349	245	1246	0.501	0.376
AT1G27510	651	c42451.graph_c0	2699	1e-159	560	0	94	651	539	2215	0.666	0.523
AT1G27520	574	c45415.graph_c0	2215	0	419	0	197	488	795	1637	0.791	0.699
AT1G27530	174	c21683.graph_c0	975	2e-90	328	0	1	165	126	620	0.958	0.921
AT1G27595	961	c47817.graph_c0	4704	0	731	0	1	961	1166	4051	0.604	0.467
AT1G27600	394	c39864.graph_c0	2590	1e-135	478	0	1	393	254	1441	0.728	0.597
AT1G27620	442	c44706.graph_c0	1821	1e-152	535	0	3	439	122	1444	0.747	0.588
AT1G27660	453	c42130.graph_c0	1779	4e-43	173	0	76	426	337	1413	0.541	0.408
AT1G27680	518	c28562.graph_c0	2726	0	749	0	60	518	838	2229	0.873	0.763
AT1G27730	227	c25753.graph_c0	1730	3e-38	155	0	1	219	872	1615	0.488	0.415
AT1G27750	1075	c38645.graph_c0	4092	1e-133	472	0	50	797	66	2699	0.515	0.339
AT1G27752	873	c48675.graph_c0	3373	1e-139	492	0	232	788	1242	2957	0.618	0.465
AT1G27760	426	c20795.graph_c0	1975	1e-140	496	0	34	426	503	1702	0.774	0.6
AT1G27840	450	c45849.graph_c0	1827	1e-165	579	0	1	450	139	1509	0.766	0.635
AT1G27850	1148	c48323.graph_c0	4413	3e-47	188	0	1	160	644	1138	0.764	0.6
AT1G27880	911	c48397.graph_c0	3789	0	845	0	139	880	916	3165	0.72	0.573
AT1G27900	700	c43263.graph_c0	3258	0	1027	0	1	699	924	3023	0.827	0.713
AT1G27920	562	c37145.graph_c0	2772	0	645	0	1	538	586	2193	0.759	0.591
AT1G27950	193	c46908.graph_c0	1193	6e-27	117	0	33	127	540	824	0.726	0.537
AT1G27970	126	c21101.graph_c0	1011	2e-56	214	0	3	126	172	540	0.895	0.815
AT1G27980	544	c29705.graph_c1	783	6e-72	269	0	152	414	4	780	0.667	0.492
AT1G27990	271	c22986.graph_c0	920	1e-83	306	0	62	271	284	919	0.821	0.726
AT1G28060	786	c36055.graph_c0	2761	0	683	0	121	786	652	2676	0.657	0.545
AT1G28110	461	c49272.graph_c4	2048	0	734	0	30	459	326	1618	0.903	0.787
AT1G28120	306	c21672.graph_c0	1488	1e-121	432	0	25	295	328	1149	0.858	0.737
AT1G28140	280	c40398.graph_c0	1411	7e-83	304	0	52	279	449	1123	0.794	0.68
AT1G28200	259	c37938.graph_c0	1357	2e-88	322	0	31	258	201	902	0.782	0.671
AT1G28220	351	c34063.graph_c0	1389	3e-93	338	0	3	330	157	1134	0.71	0.497
AT1G28250	102	c40269.graph_c0	1166	1e-14	75.5	0	1	99	589	897	0.621	0.505
AT1G28260	880	c45943.graph_c0	3673	8e-66	249	0	185	880	1282	3384	0.46	0.313
AT1G28280	247	c44998.graph_c0	1353	9e-47	184	0	47	239	365	946	0.662	0.529
AT1G28320	709	c48315.graph_c0	3788	1e-128	241	0	279	596	1227	2234	0.591	0.473
AT1G28330	122	c20981.graph_c0	815	3e-32	134	0	1	121	69	452	0.667	0.53
AT1G28340	626	c20814.graph_c0	2731	0	873	0	26	626	474	2267	0.807	0.688
AT1G28360	189	c21444.graph_c0	285	3e-30	128	0	2	68	32	232	0.91	0.896
AT1G28390	474	c46251.graph_c0	1942	1e-84	310	0	1	346	793	1782	0.618	0.496
AT1G28395	95	c39643.graph_c0	1103	2e-15	78.2	0	39	95	608	787	0.783	0.65
AT1G28410	277	c47932.graph_c0	1726	3e-12	69.7	0	106	261	639	1163	0.389	0.295
AT1G28440	996	c44305.graph_c0	3162	0	1177	0	11	996	64	3009	0.727	0.61
AT1G28480	137	c58116.graph_c0	564	5e-20	93.6	0	33	137	162	482	0.561	0.43
AT1G28490	206	c40416.graph_c0	1545	6e-44	174	0	17	168	430	876	0.719	0.621
AT1G28510	171	c34591.graph_c0	1098	4e-54	207	0	1	159	449	925	0.786	0.648
AT1G28530	614	c47913.graph_c0	2794	1e-132	359	0	197	611	809	2071	0.614	0.443
AT1G28560	386	c45485.graph_c0	2717	3e-55	213	0	77	295	1155	1805	0.677	0.507
AT1G28610	250	c50535.graph_c0	1309	4e-42	168	0	7	204	174	767	0.635	0.475
AT1G28680	451	c43818.graph_c0	2306	3e-61	233	0	6	294	1267	2175	0.595	0.389
AT1G28690	520	c48339.graph_c1	2249	1e-160	561	0	40	520	302	1747	0.763	0.544
AT1G28710	340	c44923.graph_c0	1414	1e-94	343	0	52	333	191	1060	0.725	0.581
AT1G28760	476	c26885.graph_c0	2316	1e-112	401	0	48	468	423	1682	0.673	0.495
AT1G28960	285	c34594.graph_c0	1397	1e-86	317	0	42	283	276	1019	0.746	0.643
AT1G29000	287	c40368.graph_c0	1065	3e-21	99.4	0	16	180	463	933	0.497	0.358
AT1G29040	198	c46274.graph_c1	1044	5e-60	227	0	48	198	425	853	0.828	0.728
AT1G29070	157	c37298.graph_c0	904	7e-23	103	0	78	157	373	609	0.8	0.725
AT1G29120	455	c45353.graph_c1	2471	1e-142	318	0	64	317	1074	1832	0.795	0.677
AT1G29160	175	c34570.graph_c0	506	6e-42	167	0	56	175	92	463	0.758	0.645
AT1G29170	973	c39168.graph_c0	2665	6e-60	229	0	3	349	1097	2125	0.557	0.426
AT1G29195	193	c41177.graph_c0	1233	2e-42	168	0	1	192	318	944	0.618	0.472
AT1G29200	495	c47821.graph_c0	2626	1e-151	531	0	106	494	1262	2440	0.807	0.674
AT1G29220	351	c44610.graph_c0	2470	1e-68	257	0	106	332	963	1619	0.736	0.59
AT1G29240	577	c45622.graph_c0	3488	9e-41	165	0	137	565	687	2063	0.481	0.332
AT1G29250	130	c35858.graph_c0	861	4e-49	189	0	1	111	337	666	0.928	0.847
AT1G29260	317	c21540.graph_c0	1379	1e-151	533	0	1	316	330	1283	0.881	0.761
AT1G29290	107	c33749.graph_c0	775	2e-07	51.6	0	28	107	169	408	0.609	0.425
AT1G29320	468	c27674.graph_c0	1713	1e-133	471	0	1	356	293	1357	0.76	0.64
AT1G29330	215	c20686.graph_c0	1363	1e-104	375	0	1	215	251	895	0.926	0.814
AT1G29340	729	c42979.graph_c0	3208	0	862	0	1	715	418	2529	0.74	0.611
AT1G29370	831	c44160.graph_c1	2911	1e-127	452	0	18	810	123	2540	0.512	0.386
AT1G29400	800	c48268.graph_c0	4283	0	724	0	4	779	1222	3606	0.656	0.543
AT1G29430	141	c46090.graph_c0	412	9e-28	119	0	2	113	16	327	0.705	0.509
AT1G29450	141	c49704.graph_c0	1063	2e-29	124	0	1	115	261	584	0.713	0.522
AT1G29510	143	c22063.graph_c0	584	2e-29	124	0	2	121	193	531	0.7	0.508
AT1G29520	158	c43915.graph_c0	895	5e-53	203	0	1	154	239	700	0.76	0.669
AT1G29630	665	c48483.graph_c1	3154	8e-75	279	0	29	183	1972	2436	0.929	0.813
AT1G29690	561	c42947.graph_c0	2857	0	702	0	14	561	367	2103	0.738	0.594
AT1G29700	350	c42229.graph_c0	1467	1e-116	416	0	71	343	320	1135	0.853	0.74
AT1G29790	378	c37637.graph_c0	2089	1e-130	462	0	3	378	589	1695	0.751	0.647
AT1G29800	510	c41624.graph_c0	2198	1e-173	607	0	52	469	551	1801	0.804	0.675
AT1G29810	187	c40480.graph_c0	839	9e-46	179	0	60	183	244	615	0.806	0.637
AT1G29820	540	c40961.graph_c0	2438	0	652	0	27	540	426	2021	0.744	0.616
AT1G29850	151	c26699.graph_c0	1099	2e-37	151	0	1	108	168	485	0.852	0.769
AT1G29880	729	c26572.graph_c0	3410	0	1093	0	40	729	1084	3159	0.842	0.76
AT1G29900	1187	c44540.graph_c0	3942	0	1978	0	65	1180	286	3633	0.918	0.845
AT1G29930	267	c46897.graph_c0	1306	1e-137	484	0	1	267	415	1215	0.937	0.896
AT1G29940	1178	c49099.graph_c0	4282	0	1478	0	15	1095	866	4114	0.793	0.636
AT1G29950	251	c46972.graph_c0	2837	2e-13	73.2	0	17	249	495	1145	0.401	0.256
AT1G29960	169	c47153.graph_c0	1559	2e-46	182	0	1	169	324	830	0.698	0.503
AT1G29980	407	c25564.graph_c0	1742	1e-157	551	0	35	391	329	1387	0.847	0.719
AT1G29990	129	c27647.graph_c0	1026	6e-46	179	0	7	129	163	531	0.829	0.74
AT1G30000	624	c45613.graph_c0	2801	0	912	0	1	620	676	2544	0.817	0.713
AT1G30010	711	c47755.graph_c0	2909	0	890	0	8	689	39	2072	0.765	0.631
AT1G30040	341	c38252.graph_c0	1513	1e-109	393	0	1	332	117	1109	0.752	0.582
AT1G30070	222	c25928.graph_c0	1411	4e-78	287	0	1	221	140	787	0.769	0.62
AT1G30080	408	c27261.graph_c0	1907	1e-142	501	0	12	407	662	1825	0.758	0.626
AT1G30090	398	c48799.graph_c0	4890	1e-168	588	0	15	398	820	1992	0.852	0.707
AT1G30100	589	c43357.graph_c0	2534	0	809	0	75	589	627	2183	0.85	0.744
AT1G30110	175	c27861.graph_c0	1169	8e-78	286	0	1	175	147	665	0.891	0.766
AT1G30120	406	c39973.graph_c0	1660	0	637	0	16	406	224	1369	0.867	0.806
AT1G30130	311	c43502.graph_c0	2166	7e-97	350	0	38	311	1240	2040	0.751	0.621
AT1G30220	580	c46923.graph_c0	2109	0	754	0	1	567	109	1794	0.772	0.66
AT1G30240	827	c43399.graph_c0	3039	1e-111	400	0	118	660	558	2192	0.579	0.427
AT1G30260	97	c36629.graph_c0	791	1e-11	65.5	0	1	53	532	684	0.774	0.585
AT1G30270	482	c43540.graph_c0	2590	0	760	0	28	454	626	1915	0.921	0.837
AT1G30290	806	c48635.graph_c5	3735	0	928	0	112	801	64	2139	0.808	0.637
AT1G30300	324	c46609.graph_c2	4183	1e-140	413	0	22	269	2386	3129	0.899	0.823
AT1G30320	509	c49471.graph_c0	1884	4e-95	345	0	1	508	189	1742	0.535	0.425
AT1G30360	724	c37968.graph_c1	2873	0	885	0	1	714	332	2470	0.742	0.594
AT1G30370	529	c42150.graph_c0	1764	1e-151	532	0	105	518	174	1388	0.746	0.626
AT1G30380	130	c49852.graph_c0	1042	3e-46	180	0	1	130	361	750	0.802	0.74
AT1G30440	665	c27886.graph_c0	5033	0	932	0	1	656	588	2462	0.831	0.72
AT1G30450	975	c39507.graph_c0	3300	0	1412	0	75	975	374	3085	0.836	0.751
AT1G30460	631	c37547.graph_c0	2683	1e-153	538	0	1	483	145	1638	0.647	0.579
AT1G30470	805	c41506.graph_c0	3001	0	809	0	1	671	257	2281	0.716	0.604
AT1G30480	387	c36697.graph_c0	683	2e-41	167	0	277	387	59	391	0.775	0.739
AT1G30510	317	c45905.graph_c0	1825	1e-162	569	0	15	317	417	1322	0.941	0.881
AT1G30520	560	c47123.graph_c0	2990	1e-110	395	0	171	560	1464	2816	0.616	0.467
AT1G30580	394	c21084.graph_c0	1722	0	663	0	1	394	99	1280	0.884	0.813
AT1G30610	978	c49497.graph_c1	2982	0	714	0	408	972	842	2512	0.77	0.583
AT1G30620	419	c35293.graph_c0	2027	0	719	0	1	410	443	1675	0.91	0.815
AT1G30650	430	c29504.graph_c1	1412	6e-61	231	0	167	415	245	1003	0.565	0.515
AT1G30680	709	c43717.graph_c0	3004	0	838	0	118	693	482	2224	0.811	0.675
AT1G30690	540	c35729.graph_c0	1619	1e-131	467	0	205	535	356	1372	0.817	0.649
AT1G30700	527	c43667.graph_c0	1869	1e-172	602	0	26	527	163	1665	0.729	0.573
AT1G30755	615	c20890.graph_c0	2231	1e-135	481	0	65	585	167	1693	0.663	0.502
AT1G30760	534	c40203.graph_c0	2263	0	632	0	32	530	149	1648	0.748	0.604
AT1G30800	239	c31049.graph_c0	1255	5e-20	95.1	0	25	179	597	1040	0.571	0.372
AT1G30820	600	c43125.graph_c0	3099	0	839	0	1	556	303	1982	0.804	0.738
AT1G30840	382	c36785.graph_c0	1042	8e-71	264	0	66	331	6	797	0.628	0.515
AT1G30845	118	c41005.graph_c0	1243	8e-17	82.8	0	35	106	261	476	0.667	0.597
AT1G30900	631	c36982.graph_c0	2672	0	945	0	13	631	449	2311	0.828	0.694
AT1G30910	318	c21071.graph_c0	1399	1e-115	412	0	16	317	201	1106	0.801	0.623
AT1G30960	437	c43537.graph_c0	1623	1e-117	419	0	151	437	525	1385	0.805	0.707
AT1G30970	315	c40784.graph_c0	2947	2e-27	119	0	224	294	1359	1577	0.89	0.795
AT1G31070	505	c40011.graph_c0	1966	0	818	0	35	505	299	1717	0.915	0.825
AT1G31120	796	c44022.graph_c0	2911	0	1095	0	24	796	484	2808	0.77	0.681
AT1G31220	292	c46254.graph_c0	1678	2e-89	325	0	15	291	493	1314	0.735	0.597
AT1G31240	277	c29493.graph_c0	1166	4e-18	89	0	8	244	430	1143	0.496	0.331
AT1G31280	1014	c41225.graph_c0	3338	0	829	0	143	1014	332	2953	0.66	0.47
AT1G31300	278	c43521.graph_c0	1610	1e-107	385	0	5	278	411	1250	0.8	0.646
AT1G31310	383	c51838.graph_c0	1190	8e-36	148	0	9	157	675	1157	0.578	0.491
AT1G31320	172	c28342.graph_c0	979	7e-50	193	0	1	128	311	694	0.789	0.734
AT1G31330	221	c20998.graph_c0	1391	4e-77	284	0	62	221	429	908	0.919	0.825
AT1G31340	156	c25930.graph_c0	1039	1e-71	265	0	1	152	275	730	0.901	0.895
AT1G31350	395	c47334.graph_c1	1516	1e-73	274	0	35	393	148	1212	0.583	0.423
AT1G31360	580	c49751.graph_c0	6294	0	847	0	1	579	585	2330	0.814	0.697
AT1G31410	524	c48865.graph_c0	2204	1e-142	502	0	108	523	268	1485	0.745	0.603
AT1G31420	591	c45564.graph_c0	2605	0	904	0	28	591	560	2260	0.873	0.769
AT1G31480	933	c44570.graph_c0	3455	0	1005	0	69	921	458	3076	0.702	0.571
AT1G31500	283	c43234.graph_c0	1061	1e-77	286	0	69	283	1	678	0.75	0.614
AT1G31650	576	c41318.graph_c0	2350	1e-162	569	0	4	569	456	2120	0.653	0.507
AT1G31660	444	c85773.graph_c0	353	3e-15	80.5	0	160	226	133	333	0.731	0.493
AT1G31720	194	c34482.graph_c0	1232	5e-27	117	0	37	188	344	790	0.566	0.396
AT1G31730	938	c47053.graph_c0	4008	0	1276	0	1	938	819	3725	0.772	0.688
AT1G31770	648	c41202.graph_c0	2456	0	852	0	22	648	295	2199	0.788	0.668
AT1G31780	680	c37069.graph_c0	2581	0	949	0	4	680	294	2363	0.79	0.685
AT1G31790	409	c39308.graph_c0	1919	9e-62	234	0	42	407	197	1336	0.555	0.365
AT1G31800	595	c45684.graph_c0	2911	0	859	0	44	595	873	2528	0.888	0.748
AT1G31810	1230	c39770.graph_c0	2315	1e-178	624	0	1	429	244	1494	0.814	0.681
AT1G31812	92	c47500.graph_c2	631	7e-29	122	0	1	87	169	426	0.782	0.701
AT1G31830	479	c37179.graph_c0	2184	0	702	0	5	478	523	1932	0.842	0.713
AT1G31840	840	c35549.graph_c0	1765	1e-130	461	0	319	821	257	1765	0.642	0.455
AT1G31860	281	c40122.graph_c0	2633	4e-96	348	0	14	279	871	1674	0.791	0.649
AT1G31870	561	c48950.graph_c1	2179	3e-96	349	0	39	561	479	1990	0.55	0.429
AT1G31880	344	c30183.graph_c0	1896	1e-108	389	0	1	344	366	1424	0.69	0.592
AT1G31920	606	c25880.graph_c0	2031	0	658	0	1	606	186	2000	0.712	0.512
AT1G31930	848	c40559.graph_c0	3655	0	1132	0	5	848	701	3292	0.754	0.663
AT1G31940	158	c39565.graph_c0	1409	1e-39	159	0	1	149	508	951	0.673	0.54
AT1G31970	537	c44735.graph_c1	2388	0	698	0	88	536	484	1824	0.855	0.735
AT1G32050	264	c26238.graph_c0	1609	1e-105	377	0	17	264	333	1079	0.84	0.708
AT1G32060	395	c25968.graph_c0	1937	0	630	0	1	383	528	1700	0.86	0.787
AT1G32070	257	c45997.graph_c0	2355	5e-45	178	0	40	201	1599	2045	0.691	0.599
AT1G32080	512	c21312.graph_c0	2042	0	664	0	54	512	362	1738	0.83	0.73
AT1G32090	806	c37376.graph_c0	2779	0	994	0	1	770	447	2756	0.728	0.635
AT1G32100	317	c37171.graph_c0	1329	1e-126	448	0	5	317	157	1101	0.794	0.673
AT1G32120	1206	c44152.graph_c0	2250	1e-112	403	0	943	1203	487	1269	0.858	0.697
AT1G32130	502	c25533.graph_c0	2304	1e-123	440	0	140	502	686	1765	0.764	0.64
AT1G32160	406	c35047.graph_c0	1713	1e-126	448	0	42	406	399	1481	0.755	0.619
AT1G32170	343	c26903.graph_c0	1444	1e-116	414	0	20	312	294	1187	0.792	0.654
AT1G32190	337	c45202.graph_c0	2786	2e-77	286	0	38	197	1275	1754	0.913	0.831
AT1G32200	459	c45304.graph_c0	3058	1e-151	533	0	102	458	509	1579	0.832	0.664
AT1G32210	115	c21196.graph_c0	912	4e-57	216	0	1	115	461	805	0.965	0.904
AT1G32220	296	c49946.graph_c0	1417	1e-112	402	0	5	295	201	1118	0.785	0.651
AT1G32230	589	c44741.graph_c0	6284	1e-102	369	0	72	566	478	1965	0.595	0.419
AT1G32240	388	c47076.graph_c10	714	6e-57	218	0	196	386	95	709	0.686	0.628
AT1G32260	202	c26104.graph_c0	1129	1e-52	202	0	1	199	313	912	0.665	0.553
AT1G32310	100	c26797.graph_c0	1169	2e-16	81.3	0	29	88	224	406	0.787	0.672
AT1G32330	485	c46537.graph_c1	2535	3e-99	359	0	26	375	1086	2186	0.621	0.536
AT1G32340	688	c46939.graph_c0	2715	0	705	0	181	688	681	2195	0.791	0.608
AT1G32360	384	c41426.graph_c0	1874	9e-89	324	0	24	384	279	1250	0.585	0.519
AT1G32400	280	c39844.graph_c0	1736	4e-72	268	0	1	280	249	1082	0.607	0.475
AT1G32410	140	c27043.graph_c0	903	5e-51	196	0	1	134	269	673	0.867	0.711
AT1G32415	761	c43443.graph_c0	2819	1e-122	437	0	301	739	272	1573	0.69	0.518
AT1G32440	571	c25407.graph_c0	2583	0	826	0	34	568	670	2277	0.861	0.742
AT1G32450	614	c35717.graph_c0	2581	0	852	0	6	588	688	2430	0.806	0.688
AT1G32470	166	c20943.graph_c0	2953	3e-63	238	0	1	164	2282	2767	0.817	0.713
AT1G32490	1044	c40953.graph_c0	3970	0	1369	0	145	1029	436	3102	0.882	0.757
AT1G32500	475	c43644.graph_c0	1995	1e-146	514	0	39	475	418	1725	0.742	0.582
AT1G32520	239	c26782.graph_c0	1082	2e-88	322	0	1	239	129	818	0.796	0.679
AT1G32540	187	c45587.graph_c0	1225	3e-44	174	0	65	187	436	804	0.748	0.724
AT1G32550	181	c45725.graph_c0	1289	5e-65	243	0	4	181	654	1169	0.826	0.73
AT1G32560	134	c24766.graph_c0	452	5e-19	90.1	0	1	80	122	367	0.793	0.634
AT1G32583	179	c57773.graph_c0	577	7e-40	160	0	70	178	88	420	0.793	0.667
AT1G32640	623	c45159.graph_c0	2858	1e-130	462	0	65	622	584	2494	0.582	0.459
AT1G32730	327	c44456.graph_c0	2058	2e-33	140	0	94	294	367	1056	0.541	0.394
AT1G32750	1919	c48418.graph_c0	6570	0	1170	0	216	1518	1260	5156	0.643	0.501
AT1G32790	358	c45211.graph_c1	2069	1e-113	405	0	80	358	343	1218	0.774	0.678
AT1G32810	1068	c48277.graph_c0	4515	7e-56	216	0	1	255	415	1305	0.564	0.436
AT1G32860	426	c48314.graph_c1	2205	1e-127	451	0	30	349	578	1546	0.827	0.663
AT1G32900	610	c36872.graph_c0	2339	0	796	0	1	608	101	1924	0.756	0.628
AT1G32910	464	c42888.graph_c0	1657	1e-120	430	0	11	461	158	1567	0.647	0.499
AT1G32990	222	c45174.graph_c0	1160	2e-71	265	0	78	222	401	835	0.952	0.897
AT1G33055	66	c35652.graph_c0	688	8e-11	62.8	0	1	45	345	479	0.867	0.622
AT1G33140	194	c46063.graph_c0	1096	7e-83	303	0	1	194	396	974	0.881	0.753
AT1G33260	349	c42816.graph_c0	1683	4e-76	282	0	33	339	397	1320	0.646	0.466
AT1G33270	287	c45163.graph_c0	1748	1e-104	375	0	49	287	434	1207	0.818	0.694
AT1G33330	257	c49623.graph_c1	2273	4e-50	195	0	85	257	1164	1685	0.713	0.615
AT1G33350	538	c47670.graph_c0	2898	1e-178	622	0	23	538	170	1717	0.734	0.563
AT1G33390	1237	c46249.graph_c0	4697	0	1075	0	74	1232	348	4058	0.629	0.482
AT1G33400	798	c46428.graph_c1	2841	0	648	0	1	791	371	2806	0.598	0.423
AT1G33410	1504	c49810.graph_c0	6268	0	1103	0	2	1322	2144	6067	0.622	0.44
AT1G33420	697	c41680.graph_c0	3219	1e-178	623	0	7	696	795	2903	0.623	0.461
AT1G33430	395	c27273.graph_c0	1896	1e-162	567	0	1	390	379	1563	0.808	0.666
AT1G33470	244	c47986.graph_c0	2420	5e-49	191	0	3	244	360	1154	0.577	0.472
AT1G33490	175	c37686.graph_c0	1256	1e-63	239	0	1	173	200	718	0.792	0.688
AT1G33500	276	c63459.graph_c0	301	9e-25	110	0	1	77	3	233	0.844	0.701
AT1G33520	462	c39738.graph_c0	2787	1e-104	374	0	31	462	1269	2597	0.638	0.51
AT1G33540	446	c21651.graph_c0	1827	1e-111	398	0	23	446	256	1602	0.62	0.464
AT1G33770	614	c30904.graph_c0	2784	0	486	0	69	371	1229	2155	0.835	0.754
AT1G33780	325	c36966.graph_c0	1604	3e-99	358	0	52	325	465	1346	0.738	0.612
AT1G33800	297	c42902.graph_c0	1441	1e-100	360	0	56	290	382	1083	0.835	0.695
AT1G33810	138	c26448.graph_c0	848	7e-47	182	0	4	138	357	767	0.768	0.659
AT1G33811	370	c44241.graph_c0	1379	1e-124	442	0	7	370	220	1311	0.735	0.571
AT1G33970	342	c35380.graph_c0	1595	1e-102	370	0	15	339	280	1263	0.753	0.598
AT1G33980	482	c43033.graph_c0	3551	4e-85	312	0	1	482	1692	3197	0.551	0.4
AT1G34000	172	c33253.graph_c0	1051	2e-39	159	0	1	172	220	732	0.599	0.523
AT1G34020	335	c21244.graph_c0	1620	1e-136	482	0	1	332	330	1319	0.786	0.705
AT1G34060	463	c38984.graph_c0	1006	2e-83	306	0	34	300	89	880	0.708	0.551
AT1G34065	345	c47671.graph_c0	2442	5e-75	278	0	177	345	384	890	0.899	0.751
AT1G34110	1072	c23644.graph_c0	2917	0	1210	0	165	1072	202	2916	0.767	0.675
AT1G34130	735	c50134.graph_c1	3043	0	1262	0	42	734	572	2647	0.932	0.882
AT1G34150	446	c45121.graph_c0	2019	1e-90	330	0	28	349	99	1076	0.64	0.502
AT1G34160	581	c42616.graph_c1	2281	1e-139	493	0	169	581	1038	2279	0.741	0.559
AT1G34190	557	c30423.graph_c0	2061	3e-79	293	0	18	506	122	1453	0.509	0.389
AT1G34220	619	c35091.graph_c0	2381	1e-108	391	0	1	426	719	1981	0.644	0.518
AT1G34245	120	c28482.graph_c0	574	4e-19	90.5	0	41	118	139	369	0.705	0.513
AT1G34260	1456	c49496.graph_c0	6756	1e-134	478	0	957	1451	1433	3013	0.651	0.515
AT1G34270	477	c44887.graph_c0	1680	0	443	0	207	476	149	955	0.881	0.774
AT1G34300	829	c45268.graph_c0	2954	0	887	0	25	794	223	2511	0.703	0.578
AT1G34320	657	c37760.graph_c0	2701	1e-156	549	0	56	595	681	2264	0.695	0.545
AT1G34340	530	c48693.graph_c0	3303	1e-122	436	0	1	311	2183	3124	0.799	0.662
AT1G34355	1477	c51036.graph_c0	829	3e-56	218	0	1255	1440	5	562	0.75	0.574
AT1G34360	520	c21882.graph_c0	2414	7e-33	139	0	65	253	452	988	0.539	0.424
AT1G34370	350	c34708.graph_c0	2765	1e-110	395	0	58	331	1279	2085	0.804	0.716
AT1G34380	347	c39363.graph_c0	2563	1e-106	383	0	57	347	262	1161	0.77	0.61
AT1G34430	465	c50171.graph_c0	2173	1e-154	542	0	1	465	582	1997	0.673	0.627
AT1G34550	735	c50217.graph_c0	3022	1e-178	621	0	377	735	519	1595	0.894	0.786
AT1G34570	208	c44628.graph_c0	1281	2e-13	73.2	0	17	111	253	534	0.653	0.4
AT1G34630	395	c49058.graph_c1	2853	4e-74	275	0	220	394	1320	1844	0.857	0.714
AT1G34640	110	c39556.graph_c0	852	3e-21	97.4	0	1	109	318	644	0.569	0.404
AT1G34670	365	c38731.graph_c0	1396	1e-83	307	0	1	230	152	814	0.757	0.672
AT1G34750	282	c39737.graph_c0	1729	1e-123	437	0	1	282	405	1244	0.887	0.723
AT1G34770	237	c45147.graph_c0	1811	4e-81	297	0	17	237	294	953	0.824	0.624
AT1G34780	310	c25493.graph_c0	1536	3e-76	282	0	21	298	468	1316	0.701	0.546
AT1G35180	231	c27703.graph_c0	1148	2e-89	325	0	3	228	209	880	0.832	0.655
AT1G35220	1005	c42102.graph_c0	3884	0	1392	0	1	989	294	3275	0.814	0.677
AT1G35420	310	c36709.graph_c0	2000	8e-79	290	0	81	310	953	1654	0.765	0.598
AT1G35470	467	c45617.graph_c0	1937	1e-176	614	0	29	467	381	1694	0.8	0.666
AT1G35510	568	c45947.graph_c1	2408	0	580	0	48	453	420	1685	0.779	0.687
AT1G35530	1390	c39557.graph_c0	4466	0	804	0	62	575	110	1663	0.837	0.756
AT1G35620	440	c34850.graph_c0	1852	1e-142	501	0	1	440	175	1455	0.758	0.575
AT1G35660	1405	c46061.graph_c0	4942	0	1256	0	24	1401	150	4520	0.622	0.496
AT1G35680	220	c42476.graph_c0	1288	1e-40	163	0	97	210	457	798	0.816	0.719
AT1G35710	1120	c41890.graph_c0	3687	0	654	0	40	1120	143	3541	0.521	0.355
AT1G35830	302	c47577.graph_c0	3197	5e-17	85.5	0	94	168	1871	2107	0.679	0.605
AT1G36050	386	c37441.graph_c0	1948	0	682	0	1	386	369	1526	0.896	0.826
AT1G36160	2254	c46126.graph_c0	7882	0	3724	0	14	2253	513	7226	0.888	0.8
AT1G36280	527	c44639.graph_c0	2259	0	746	0	18	510	465	1958	0.842	0.714
AT1G36310	404	c33444.graph_c0	1510	1e-119	426	0	68	398	181	1107	0.753	0.627
AT1G36320	414	c28574.graph_c1	1489	1e-150	527	0	88	414	267	1244	0.902	0.746
AT1G36370	598	c44143.graph_c0	2973	0	788	0	1	592	709	2607	0.722	0.625
AT1G36390	279	c36643.graph_c0	1556	9e-66	247	0	60	273	466	1110	0.8	0.549
AT1G36730	439	c40124.graph_c0	2125	1e-128	456	0	1	432	473	1801	0.629	0.557
AT1G36980	135	c50009.graph_c0	965	1e-56	214	0	1	135	404	808	0.933	0.859
AT1G36990	581	c44640.graph_c0	3901	3e-45	180	0	112	564	578	1999	0.476	0.336
AT1G37130	917	c47862.graph_c0	3654	0	1400	0	1	917	570	3329	0.83	0.724
AT1G40087	390	c46271.graph_c0	3588	2e-09	60.5	0	37	261	1890	2588	0.436	0.229
AT1G40390	426	c39749.graph_c0	1482	2e-15	65.5	0	95	209	491	820	0.517	0.284
AT1G42430	426	c42639.graph_c4	3324	1e-165	579	0	48	400	578	1633	0.894	0.807
AT1G42440	793	c48703.graph_c0	2845	0	1033	0	1	790	347	2710	0.783	0.643
AT1G42470	1272	c47218.graph_c1	4546	0	1545	0	13	1164	389	3889	0.772	0.641
AT1G42480	182	c21646.graph_c0	1354	3e-57	218	0	1	165	202	699	0.777	0.62
AT1G42550	843	c46247.graph_c0	3051	0	712	0	1	842	240	2810	0.609	0.475
AT1G42960	168	c25350.graph_c0	1250	2e-34	142	0	1	166	579	1058	0.627	0.538
AT1G42970	447	c26077.graph_c0	2751	0	736	0	1	447	795	2147	0.872	0.808
AT1G42990	295	c42187.graph_c0	1692	6e-11	65.5	0	157	217	633	806	0.672	0.574
AT1G43130	261	c37447.graph_c0	1508	1e-108	389	0	1	261	462	1214	0.824	0.747
AT1G43190	432	c46067.graph_c0	2568	1e-157	551	0	96	432	1411	2457	0.874	0.762
AT1G43245	558	c47934.graph_c0	2647	7e-69	258	0	134	547	1035	2516	0.486	0.357
AT1G43580	421	c33277.graph_c0	1875	1e-163	572	0	9	399	453	1628	0.802	0.698
AT1G43620	615	c51673.graph_c0	2000	0	656	0	151	612	192	1562	0.799	0.665
AT1G43670	341	c33516.graph_c0	1727	1e-177	617	0	1	339	411	1427	0.926	0.873
AT1G43690	599	c35328.graph_c0	2800	0	726	0	1	599	468	2315	0.726	0.598
AT1G43700	341	c43776.graph_c1	1249	3e-47	186	0	30	316	301	1203	0.53	0.454
AT1G43710	482	c20945.graph_c0	2228	0	786	0	55	482	386	1672	0.935	0.839
AT1G43770	371	c44811.graph_c0	1917	2e-07	53.9	0	294	365	648	854	0.625	0.389
AT1G43850	877	c44763.graph_c7	1197	1e-141	498	0	300	578	246	1082	0.889	0.832
AT1G43860	370	c47790.graph_c0	1709	1e-148	523	0	1	370	441	1517	0.83	0.689
AT1G43890	212	c50078.graph_c0	1229	7e-97	350	0	5	200	317	904	0.918	0.852
AT1G43900	371	c41715.graph_c0	1758	1e-123	438	0	97	369	307	1125	0.883	0.744
AT1G43980	621	c48552.graph_c0	3205	1e-157	553	0	1	611	406	2235	0.66	0.462
AT1G44110	460	c48526.graph_c0	5852	1e-134	477	0	41	460	4028	5398	0.691	0.546
AT1G44170	421	c43405.graph_c0	2550	0	641	0	9	419	731	1963	0.861	0.72
AT1G44414	101	c50352.graph_c0	636	2e-26	114	0	18	101	327	605	0.731	0.581
AT1G44446	536	c42385.graph_c0	2267	0	833	0	1	535	580	2172	0.845	0.75
AT1G44575	265	c20993.graph_c0	1444	2e-75	279	0	87	265	325	861	0.849	0.816
AT1G44750	303	c44081.graph_c0	2463	4e-94	341	0	1	286	367	1224	0.741	0.58
AT1G44760	213	c26896.graph_c0	1160	2e-67	252	0	7	213	238	903	0.737	0.621
AT1G44770	271	c20879.graph_c0	1162	2e-83	305	0	6	271	266	1063	0.722	0.545
AT1G44790	199	c37649.graph_c0	1046	4e-69	150	0	81	183	315	623	0.796	0.709
AT1G44820	438	c44704.graph_c0	1800	1e-169	591	0	30	432	394	1608	0.83	0.667
AT1G44835	308	c36352.graph_c0	1594	1e-105	377	0	1	305	291	1256	0.762	0.604
AT1G44900	936	c34210.graph_c0	3393	0	1315	0	1	928	505	3324	0.783	0.692
AT1G44910	958	c44916.graph_c0	4007	1e-164	576	0	11	803	450	2912	0.556	0.399
AT1G44920	258	c40589.graph_c0	1766	2e-62	236	0	39	258	242	901	0.668	0.543
AT1G44960	261	c42067.graph_c0	2026	8e-80	293	0	19	247	261	950	0.778	0.635
AT1G44970	346	c21608.graph_c0	1638	1e-126	448	0	38	346	451	1377	0.822	0.68
AT1G45110	343	c48626.graph_c0	4335	2e-32	136	0	234	337	4009	4335	0.798	0.651
AT1G45150	643	c43481.graph_c1	1432	1e-153	540	0	1	400	212	1432	0.812	0.628
AT1G45207	555	c42480.graph_c0	2047	1e-104	377	0	115	555	199	1584	0.64	0.504
AT1G45230	219	c49085.graph_c4	1432	3e-57	218	0	58	217	444	941	0.753	0.657
AT1G45231	538	c47530.graph_c0	2711	2e-86	317	0	320	526	300	917	0.821	0.725
AT1G45249	416	c21379.graph_c0	2385	1e-26	118	0	289	396	1421	1744	0.67	0.606
AT1G45474	256	c42240.graph_c0	1348	9e-89	323	0	43	256	401	1039	0.827	0.743
AT1G45616	994	c31245.graph_c1	3256	1e-153	540	0	1	984	58	3024	0.513	0.359
AT1G45688	342	c37531.graph_c0	1581	1e-76	283	0	1	338	138	1118	0.55	0.455
AT1G46480	251	c45149.graph_c1	1175	1e-54	209	0	1	251	77	763	0.576	0.479
AT1G47128	462	c49888.graph_c0	2010	1e-175	611	0	7	455	269	1621	0.775	0.651
AT1G47230	369	c49700.graph_c0	3249	4e-89	325	0	132	369	201	914	0.828	0.639
AT1G47240	530	c46616.graph_c0	2240	0	799	0	31	504	291	1709	0.918	0.808
AT1G47271	193	c46518.graph_c0	3418	6e-58	220	0	21	193	2522	3049	0.801	0.591
AT1G47278	80	c42107.graph_c0	978	4e-25	110	0	1	80	332	571	0.763	0.65
AT1G47330	527	c22166.graph_c0	1713	1e-161	566	0	2	457	63	1307	0.728	0.635
AT1G47380	428	c43052.graph_c1	2287	0	693	0	2	428	823	2100	0.895	0.754
AT1G47390	370	c49182.graph_c0	1741	1e-12	71.2	0	7	267	453	1418	0.434	0.269
AT1G47410	189	c38318.graph_c0	1402	4e-14	75.1	0	49	179	338	829	0.479	0.345
AT1G47420	257	c36706.graph_c0	1170	4e-65	244	0	78	256	332	868	0.788	0.62
AT1G47480	314	c45764.graph_c0	1249	1e-91	333	0	7	311	130	1056	0.686	0.516
AT1G47490	432	c36165.graph_c0	1957	1e-128	455	0	99	390	560	1432	0.847	0.756
AT1G47530	484	c40788.graph_c0	2355	0	657	0	30	482	568	1926	0.868	0.742
AT1G47550	887	c21322.graph_c0	3137	0	1540	0	1	887	318	2984	0.893	0.831
AT1G47570	466	c38863.graph_c0	2473	2e-87	320	0	201	464	1346	2134	0.727	0.566
AT1G47578	280	c46459.graph_c0	2153	6e-54	207	0	136	274	461	901	0.823	0.68
AT1G47640	228	c50223.graph_c0	1329	1e-114	407	0	1	227	139	819	0.925	0.855
AT1G47670	519	c27140.graph_c0	2044	0	839	0	1	517	210	1784	0.867	0.802
AT1G47710	391	c45693.graph_c0	1569	1e-133	473	0	1	390	125	1285	0.779	0.595
AT1G47720	261	c24703.graph_c0	1213	4e-26	115	0	36	252	295	948	0.471	0.332
AT1G47740	279	c33216.graph_c0	1531	1e-84	269	0	29	197	667	1170	0.84	0.751
AT1G47830	142	c37733.graph_c0	1072	2e-72	267	0	1	136	413	820	0.978	0.956
AT1G47840	493	c44378.graph_c1	2031	0	630	0	5	493	348	1832	0.768	0.651
AT1G47960	205	c26702.graph_c0	1266	2e-21	99.4	0	21	157	278	706	0.58	0.378
AT1G47980	315	c20749.graph_c0	1150	2e-80	296	0	43	309	243	1046	0.672	0.593
AT1G48030	507	c26182.graph_c0	2430	0	843	0	1	507	649	2172	0.886	0.807
AT1G48050	680	c40948.graph_c0	2708	0	824	0	1	675	508	2622	0.741	0.581
AT1G48090	4146	c49305.graph_c0	13159	0	5044	0	16	4118	646	12930	0.751	0.602
AT1G48100	475	c20741.graph_c0	1917	1e-165	578	0	8	464	201	1586	0.751	0.626
AT1G48110	639	c45389.graph_c0	3151	1e-110	395	0	266	638	1214	2353	0.692	0.567
AT1G48120	1340	c49813.graph_c0	4485	1e-107	388	0	11	502	173	1720	0.573	0.437
AT1G48130	216	c53714.graph_c0	896	2e-93	338	0	1	215	148	804	0.86	0.729
AT1G48140	89	c37365.graph_c0	989	3e-36	147	0	1	89	270	536	0.899	0.73
AT1G48170	153	c33888.graph_c0	1969	6e-35	143	0	59	145	583	843	0.897	0.782
AT1G48175	182	c43205.graph_c0	2222	2e-66	248	0	1	178	200	742	0.762	0.657
AT1G48200	118	c38284.graph_c0	822	2e-17	84.7	0	1	118	66	407	0.593	0.39
AT1G48270	326	c40324.graph_c0	1688	1e-138	489	0	15	326	77	997	0.839	0.763
AT1G48300	285	c33221.graph_c0	1716	2e-28	123	0	21	273	577	1332	0.493	0.33
AT1G48310	673	c47207.graph_c2	2216	0	751	0	45	541	546	2027	0.863	0.724
AT1G48320	156	c42171.graph_c1	1348	2e-51	198	0	3	156	441	902	0.799	0.584
AT1G48350	170	c21488.graph_c0	880	1e-57	219	0	45	170	304	681	0.897	0.817
AT1G48360	891	c47119.graph_c0	3580	1e-146	516	0	492	888	1881	3086	0.767	0.624
AT1G48380	355	c45576.graph_c1	1842	3e-72	269	0	29	341	831	1709	0.601	0.475
AT1G48410	1048	c40242.graph_c0	3623	0	1563	0	115	1046	245	3085	0.855	0.797
AT1G48420	401	c20869.graph_c0	1450	1e-165	577	0	31	400	169	1278	0.857	0.73
AT1G48430	593	c41125.graph_c0	2549	0	825	0	6	571	230	1927	0.822	0.72
AT1G48460	340	c45538.graph_c0	1498	4e-88	322	0	55	340	282	1130	0.713	0.538
AT1G48520	550	c49444.graph_c1	3823	0	862	0	37	548	1804	3333	0.908	0.791
AT1G48540	1063	c49515.graph_c3	3953	1e-168	460	0	110	609	669	2195	0.659	0.501
AT1G48550	324	c38517.graph_c0	2587	7e-14	75.1	0	270	318	377	523	0.816	0.673
AT1G48570	455	c21132.graph_c0	1968	2e-67	253	0	18	404	811	1836	0.511	0.383
AT1G48580	454	c38737.graph_c1	605	1e-26	118	0	10	212	49	603	0.539	0.398
AT1G48600	475	c43546.graph_c2	2178	0	817	0	1	475	348	1772	0.891	0.802
AT1G48635	364	c44826.graph_c0	827	6e-63	238	0	4	180	297	827	0.814	0.621
AT1G48650	1197	c44400.graph_c0	4647	0	1659	0	66	1181	993	4331	0.84	0.717
AT1G48760	869	c47155.graph_c0	3532	0	763	0	4	526	241	1821	0.839	0.698
AT1G48790	507	c37342.graph_c0	2020	1e-167	586	0	1	507	293	1840	0.739	0.603
AT1G48830	191	c48556.graph_c1	915	1e-61	233	0	55	191	503	913	0.927	0.803
AT1G48850	436	c21192.graph_c0	1982	1e-176	615	0	35	418	322	1470	0.888	0.805
AT1G48880	445	c44193.graph_c0	2448	1e-136	483	0	67	440	701	1801	0.761	0.58
AT1G48900	495	c37367.graph_c0	2325	0	848	0	1	479	723	2159	0.916	0.841
AT1G48910	383	c30936.graph_c0	1508	1e-112	401	0	3	377	226	1350	0.718	0.484
AT1G48940	177	c50557.graph_c0	771	3e-34	141	0	11	129	346	711	0.732	0.52
AT1G48950	594	c47398.graph_c0	3529	1e-136	483	0	1	587	1481	3346	0.567	0.44
AT1G48960	219	c30200.graph_c0	1055	2e-23	105	0	77	206	432	818	0.577	0.4
AT1G49000	156	c38755.graph_c0	810	6e-14	73.6	0	17	147	282	716	0.5	0.338
AT1G49040	1187	c37839.graph_c4	4389	0	1107	0	413	1187	315	2648	0.825	0.687
AT1G49170	126	c38254.graph_c0	1245	4e-40	160	0	25	124	478	777	0.91	0.78
AT1G49180	376	c43931.graph_c0	1746	6e-73	271	0	3	251	860	1693	0.665	0.511
AT1G49230	219	c23360.graph_c0	1218	6e-50	194	0	45	219	457	999	0.663	0.53
AT1G49320	280	c38964.graph_c0	1429	4e-62	235	0	49	278	425	1102	0.691	0.478
AT1G49330	331	c87220.graph_c0	251	5e-14	75.9	0	163	224	52	237	0.742	0.5
AT1G49340	2028	c47625.graph_c0	7381	0	2580	0	1	1888	815	6481	0.787	0.686
AT1G49350	378	c46948.graph_c0	1944	3e-87	319	0	3	378	336	1469	0.648	0.466
AT1G49380	547	c43217.graph_c0	3066	0	419	0	7	330	2082	3032	0.741	0.649
AT1G49400	116	c21619.graph_c0	951	1e-36	148	0	1	83	175	423	0.952	0.819
AT1G49430	665	c44371.graph_c0	2466	0	933	0	11	661	320	2260	0.823	0.651
AT1G49475	190	c34002.graph_c0	1285	8e-19	90.5	0	31	141	882	1220	0.602	0.416
AT1G49510	240	c45661.graph_c0	2048	5e-57	218	0	29	227	787	1377	0.724	0.503
AT1G49540	838	c43610.graph_c0	3255	0	1075	0	5	834	201	2675	0.766	0.63
AT1G49570	350	c50221.graph_c0	1413	1e-104	376	0	46	346	356	1255	0.722	0.603
AT1G49590	146	c40982.graph_c0	1522	6e-26	113	0	1	100	204	497	0.69	0.54
AT1G49620	195	c46354.graph_c0	1116	1e-13	73.2	0	150	195	249	386	0.804	0.63
AT1G49670	629	c41482.graph_c0	2570	0	922	0	1	629	134	2035	0.838	0.683
AT1G49710	513	c27032.graph_c0	2151	0	667	0	5	513	31	1563	0.752	0.626
AT1G49780	421	c37796.graph_c0	1702	1e-132	468	0	5	418	102	1325	0.739	0.607
AT1G49820	420	c47493.graph_c0	1813	0	535	0	6	314	265	1188	0.913	0.797
AT1G49850	250	c47468.graph_c3	977	4e-22	102	0	106	247	218	724	0.5	0.365
AT1G49870	828	c44700.graph_c0	2417	1e-108	391	0	63	705	300	2030	0.538	0.407
AT1G49880	191	c40702.graph_c0	957	2e-65	224	0	69	188	300	659	0.925	0.833
AT1G49890	659	c46290.graph_c0	2195	1e-126	451	0	107	648	400	2025	0.605	0.493
AT1G49950	300	c34751.graph_c0	1533	1e-70	263	0	1	237	222	941	0.709	0.586
AT1G49970	387	c37474.graph_c0	1746	1e-148	522	0	1	374	162	1307	0.788	0.677
AT1G49980	671	c38224.graph_c0	1404	1e-174	608	0	5	402	206	1399	0.844	0.721
AT1G50000	296	c44617.graph_c0	1851	2e-97	352	0	40	294	896	1756	0.746	0.617
AT1G50010	450	c20965.graph_c0	2294	0	843	0	1	432	507	1802	0.947	0.928
AT1G50020	209	c50047.graph_c0	1459	3e-45	178	0	46	209	354	857	0.732	0.565
AT1G50030	2481	c48615.graph_c0	7929	0	3861	0	1	2481	222	7670	0.843	0.761
AT1G50120	532	c41278.graph_c0	2344	1e-170	594	0	2	531	469	2052	0.695	0.566
AT1G50170	225	c40640.graph_c0	1434	2e-55	213	0	91	221	634	1026	0.824	0.733
AT1G50180	857	c41122.graph_c0	3175	2e-97	354	0	27	847	251	2959	0.485	0.313
AT1G50200	1003	c44256.graph_c1	3698	0	1465	0	51	1003	306	3164	0.831	0.727
AT1G50240	1322	c45734.graph_c0	2330	0	704	0	458	1218	3	2330	0.637	0.482
AT1G50250	716	c26145.graph_c0	2744	0	1045	0	91	716	291	2165	0.893	0.858
AT1G50300	372	c41498.graph_c0	1840	5e-92	335	0	3	309	253	1227	0.64	0.57
AT1G50370	303	c26367.graph_c0	1478	1e-180	627	0	1	303	360	1268	1	0.977
AT1G50380	710	c48175.graph_c0	2846	0	1111	0	9	708	315	2414	0.863	0.74
AT1G50410	981	c44629.graph_c0	4173	0	933	0	136	980	493	3075	0.699	0.562
AT1G50420	482	c37053.graph_c0	2411	0	635	0	7	482	302	1657	0.807	0.655
AT1G50430	432	c40694.graph_c0	2153	0	784	0	2	432	334	1626	0.942	0.849
AT1G50440	250	c48962.graph_c0	1407	4e-96	347	0	1	250	280	1032	0.755	0.669
AT1G50450	428	c48525.graph_c6	2265	8e-94	341	0	231	428	1148	1741	0.899	0.808
AT1G50480	634	c37895.graph_c0	2455	0	1142	0	2	634	381	2279	0.948	0.863
AT1G50490	180	c28449.graph_c0	1168	1e-76	282	0	1	180	251	793	0.823	0.779
AT1G50500	828	c42663.graph_c0	3230	0	1266	0	1	827	224	2683	0.836	0.747
AT1G50510	330	c89660.graph_c0	275	2e-12	70.9	0	183	258	2	244	0.654	0.444
AT1G50575	306	c30622.graph_c0	1523	3e-72	268	0	117	288	274	789	0.831	0.698
AT1G50590	310	c42079.graph_c0	1314	4e-99	319	0	55	305	303	1028	0.753	0.637
AT1G50620	629	c42497.graph_c0	3399	2e-70	264	0	31	419	390	1745	0.522	0.352
AT1G50640	225	c37170.graph_c0	1317	7e-18	87.8	0	26	85	480	659	0.717	0.65
AT1G50660	725	c40549.graph_c0	2586	0	650	0	66	725	489	2459	0.693	0.546
AT1G50670	208	c26829.graph_c0	1358	1e-96	349	0	1	208	469	1092	0.88	0.769
AT1G50700	521	c35289.graph_c0	2789	0	790	0	44	518	618	2075	0.885	0.768
AT1G50710	423	c48234.graph_c0	1979	1e-164	575	0	1	419	600	1859	0.787	0.723
AT1G50730	923	c48982.graph_c2	3222	0	667	0	108	913	288	2636	0.632	0.446
AT1G50740	119	c44681.graph_c0	1001	4e-35	143	0	1	119	453	809	0.697	0.563
AT1G50830	768	c48860.graph_c0	3124	1e-89	328	0	12	450	1637	2974	0.572	0.4
AT1G50840	1050	c46436.graph_c0	3989	0	1171	0	255	1050	509	2866	0.816	0.7
AT1G50900	175	c24442.graph_c0	1123	6e-54	206	0	47	175	240	608	0.876	0.767
AT1G50910	500	c41015.graph_c0	1986	1e-24	111	0	123	251	860	1231	0.612	0.488
AT1G50920	671	c49237.graph_c0	2503	0	1006	0	1	671	132	2156	0.833	0.753
AT1G50940	363	c43296.graph_c0	1517	1e-128	454	0	42	363	309	1268	0.798	0.683
AT1G51060	132	c45316.graph_c1	902	7e-53	202	0	1	132	411	803	0.826	0.788
AT1G51100	211	c20822.graph_c0	1252	3e-69	258	0	36	211	194	739	0.804	0.723
AT1G51110	409	c42608.graph_c0	1812	1e-140	496	0	71	407	299	1303	0.846	0.709
AT1G51130	403	c46176.graph_c0	1344	7e-92	334	0	59	400	269	1303	0.693	0.523
AT1G51160	169	c38009.graph_c0	1569	2e-84	307	0	1	168	775	1278	0.929	0.845
AT1G51170	404	c21208.graph_c0	1397	1e-106	382	0	35	388	181	1248	0.687	0.548
AT1G51190	568	c59610.graph_c0	994	1e-106	384	0	173	395	103	768	0.915	0.798
AT1G51200	173	c45727.graph_c1	2120	2e-50	195	0	1	173	1469	1987	0.643	0.555
AT1G51310	497	c39506.graph_c0	1961	0	560	0	143	476	364	1377	0.87	0.784
AT1G51340	509	c21585.graph_c0	2293	1e-169	592	0	20	508	474	1928	0.759	0.652
AT1G51350	666	c44572.graph_c0	2822	0	725	0	18	665	594	2522	0.752	0.542
AT1G51400	106	c34629.graph_c0	3620	1e-12	68.9	0	1	104	2827	3126	0.548	0.394
AT1G51405	487	c54927.graph_c0	1569	2e-63	240	0	52	479	53	1387	0.544	0.382
AT1G51440	527	c25783.graph_c0	2244	1e-175	612	0	87	522	513	1802	0.798	0.675
AT1G51450	509	c21120.graph_c0	1652	1e-125	444	0	249	501	812	1570	0.881	0.783
AT1G51510	202	c21089.graph_c0	1329	1e-61	232	0	1	176	658	1188	0.763	0.65
AT1G51540	415	c46605.graph_c0	1921	1e-166	582	0	10	411	427	1656	0.786	0.687
AT1G51550	478	c39614.graph_c1	2436	1e-106	382	0	143	463	386	1327	0.735	0.582
AT1G51560	392	c48208.graph_c0	2922	5e-82	301	0	56	274	423	1109	0.765	0.674
AT1G51580	621	c46514.graph_c0	2844	2e-74	191	0	21	331	216	1073	0.578	0.394
AT1G51590	456	c37781.graph_c0	2725	0	760	0	1	452	750	2114	0.899	0.811
AT1G51610	457	c49079.graph_c0	5385	1e-166	580	0	90	450	3635	4855	0.781	0.693
AT1G51650	70	c20903.graph_c0	867	8e-29	122	0	1	66	215	412	0.939	0.818
AT1G51660	366	c37768.graph_c0	1744	1e-129	457	0	30	340	311	1207	0.797	0.723
AT1G51680	561	c44457.graph_c0	2537	0	730	0	4	561	507	2156	0.778	0.648
AT1G51710	482	c26349.graph_c0	1962	0	713	0	4	482	333	1772	0.815	0.731
AT1G51720	637	c27195.graph_c0	2648	0	1016	0	1	637	225	2132	0.859	0.757
AT1G51730	252	c46755.graph_c0	1601	2e-70	262	0	1	248	195	947	0.635	0.563
AT1G51740	310	c38200.graph_c0	1808	1e-107	384	0	1	310	467	1393	0.748	0.61
AT1G51760	440	c40556.graph_c0	2611	1e-158	554	0	1	440	1105	2436	0.751	0.613
AT1G51940	651	c47065.graph_c0	2691	0	760	0	20	651	517	2433	0.713	0.587
AT1G51965	650	c47273.graph_c0	3128	0	625	0	252	650	1198	2394	0.88	0.709
AT1G52080	573	c42298.graph_c0	2588	3e-82	303	0	1	436	820	2184	0.592	0.43
AT1G52140	208	c37093.graph_c0	1162	9e-23	103	0	7	204	236	838	0.481	0.348
AT1G52190	607	c37198.graph_c0	2344	0	721	0	6	587	272	2014	0.743	0.579
AT1G52220	127	c49968.graph_c0	839	1e-15	78.6	0	77	127	454	606	0.824	0.686
AT1G52280	206	c34909.graph_c0	1271	1e-107	382	0	1	206	298	915	0.942	0.874
AT1G52310	552	c40432.graph_c0	2129	1e-180	627	0	50	536	283	1734	0.782	0.635
AT1G52320	472	c40852.graph_c2	2230	1e-172	603	0	28	455	573	1877	0.815	0.681
AT1G52330	214	c37296.graph_c0	1252	2e-42	169	0	60	213	423	884	0.708	0.487
AT1G52340	285	c45451.graph_c0	2643	1e-96	349	0	16	285	229	1029	0.733	0.656
AT1G52343	249	c33409.graph_c0	1072	1e-09	60.8	0	95	242	220	681	0.478	0.298
AT1G52360	926	c46928.graph_c0	3635	0	1586	0	1	926	275	3016	0.891	0.809
AT1G52370	269	c43071.graph_c0	803	2e-42	169	0	133	263	2	394	0.74	0.603
AT1G52380	440	c37212.graph_c0	2074	5e-59	225	0	206	439	792	1487	0.633	0.533
AT1G52500	274	c44280.graph_c0	2055	1e-113	405	0	1	265	135	929	0.857	0.728
AT1G52510	380	c42833.graph_c0	2095	1e-152	298	0	205	379	798	1322	0.891	0.817
AT1G52520	703	c33991.graph_c0	3055	0	877	0	45	703	718	2709	0.772	0.633
AT1G52530	319	c22995.graph_c0	968	3e-73	272	0	106	318	377	967	0.757	0.631
AT1G52560	232	c21258.graph_c0	1124	6e-38	154	0	10	231	159	851	0.577	0.444
AT1G52580	309	c33268.graph_c0	1729	1e-64	243	0	31	284	320	1099	0.639	0.468
AT1G52590	172	c45756.graph_c2	902	1e-53	205	0	36	172	245	655	0.832	0.708
AT1G52600	180	c26363.graph_c0	1109	2e-92	335	0	1	180	155	694	0.956	0.894
AT1G52620	819	c39608.graph_c0	3574	1e-179	627	0	213	808	999	2783	0.686	0.503
AT1G52630	351	c42958.graph_c0	2286	1e-146	515	0	34	351	1117	2070	0.855	0.742
AT1G52640	523	c46158.graph_c0	2053	1e-164	574	0	1	495	206	1708	0.725	0.554
AT1G52670	274	c47078.graph_c0	1415	2e-52	202	0	65	274	455	1093	0.643	0.516
AT1G52680	114	c50176.graph_c0	881	5e-09	56.6	0	4	98	80	298	0.516	0.4
AT1G52720	117	c26593.graph_c1	440	2e-22	100	0	5	114	83	433	0.595	0.484
AT1G52740	134	c50006.graph_c0	987	2e-57	217	0	1	134	356	757	0.873	0.828
AT1G52780	1059	c47513.graph_c0	4107	0	926	0	41	972	560	3391	0.66	0.504
AT1G52790	310	c30063.graph_c0	1070	1e-81	300	0	3	310	84	1001	0.675	0.451
AT1G52855	68	c50390.graph_c0	556	5e-27	116	0	1	68	203	406	0.897	0.765
AT1G52870	366	c40104.graph_c0	1702	1e-122	434	0	2	345	56	1078	0.751	0.653
AT1G52920	410	c39500.graph_c0	1771	1e-168	587	0	1	410	300	1526	0.815	0.676
AT1G52980	576	c41549.graph_c0	1922	0	672	0	12	511	279	1778	0.753	0.676
AT1G53000	290	c26246.graph_c0	1520	1e-127	450	0	1	290	185	1069	0.834	0.736
AT1G53035	150	c36329.graph_c0	1586	1e-54	208	0	6	150	237	671	0.834	0.676
AT1G53050	694	c39714.graph_c1	2371	0	911	0	1	676	51	2201	0.757	0.652
AT1G53120	320	c46727.graph_c0	1577	9e-39	157	0	202	320	885	1328	0.669	0.581
AT1G53140	817	c48019.graph_c0	2740	0	1134	0	35	817	369	2711	0.823	0.725
AT1G53190	494	c27028.graph_c0	2295	3e-59	226	0	24	491	456	1991	0.473	0.352
AT1G53210	585	c45332.graph_c0	1171	1e-101	365	0	29	326	284	1171	0.722	0.613
AT1G53240	341	c42036.graph_c0	4260	1e-148	522	0	2	341	191	1228	0.853	0.743
AT1G53250	371	c47281.graph_c0	2034	6e-40	118	0	146	352	725	1357	0.522	0.36
AT1G53270	590	c34351.graph_c0	2180	0	672	0	1	589	159	2000	0.714	0.569
AT1G53280	438	c41828.graph_c0	1700	1e-164	574	0	53	437	300	1454	0.86	0.709
AT1G53290	345	c49733.graph_c0	2278	1e-126	449	0	6	340	1083	2108	0.769	0.645
AT1G53300	699	c39577.graph_c0	3010	0	684	0	136	698	569	2224	0.735	0.608
AT1G53310	967	c25818.graph_c0	3609	0	1717	0	1	967	335	3232	0.913	0.848
AT1G53320	379	c40674.graph_c0	1631	1e-145	512	0	40	379	326	1318	0.833	0.716
AT1G53330	471	c22004.graph_c0	1536	1e-124	443	0	1	442	179	1492	0.67	0.507
AT1G53345	325	c44883.graph_c0	1582	1e-121	431	0	1	324	266	1240	0.794	0.647
AT1G53380	453	c45625.graph_c0	2531	1e-129	459	0	1	451	608	2017	0.674	0.498
AT1G53390	1109	c47486.graph_c0	3866	0	1149	0	72	1109	426	3551	0.689	0.559
AT1G53400	114	c42727.graph_c1	889	3e-50	193	0	1	110	58	390	0.901	0.811
AT1G53440	1035	c37974.graph_c0	3839	0	1043	0	23	1007	330	3509	0.659	0.518
AT1G53490	304	c35086.graph_c0	1214	1e-130	461	0	1	304	77	961	0.845	0.735
AT1G53520	287	c25499.graph_c1	1249	2e-73	273	0	82	286	352	966	0.78	0.663
AT1G53530	118	c46943.graph_c1	2193	3e-34	140	0	1	108	279	596	0.782	0.609
AT1G53570	608	c29716.graph_c0	3730	1e-141	498	0	142	608	813	2225	0.7	0.582
AT1G53580	294	c45212.graph_c1	1408	1e-115	412	0	51	288	244	957	0.916	0.815
AT1G53590	751	c37689.graph_c0	2657	0	724	0	40	628	528	2297	0.735	0.601
AT1G53600	717	c54267.graph_c0	1448	1e-127	454	0	40	483	2	1333	0.689	0.509
AT1G53645	523	c20829.graph_c0	2275	1e-71	268	0	333	523	1293	1865	0.785	0.649
AT1G53670	202	c50018.graph_c0	1061	6e-70	260	0	57	194	282	695	0.935	0.826
AT1G53700	476	c23168.graph_c0	1186	6e-98	355	0	142	444	1	897	0.707	0.608
AT1G53708	109	c21383.graph_c0	1134	2e-15	77.8	0	1	91	288	557	0.592	0.469
AT1G53710	528	c46117.graph_c1	3754	1e-67	206	0	252	436	1596	2153	0.667	0.522
AT1G53720	506	c41184.graph_c0	2142	1e-173	605	0	1	422	739	1977	0.811	0.68
AT1G53750	426	c21080.graph_c0	1980	0	845	0	1	426	564	1841	0.984	0.967
AT1G53760	212	c80772.graph_c0	349	6e-07	51.2	0	145	182	233	349	0.846	0.538
AT1G53800	568	c45809.graph_c0	4010	7e-63	239	0	1	267	2896	3720	0.609	0.491
AT1G53860	442	c30116.graph_c0	1772	7e-66	248	0	177	437	86	934	0.682	0.521
AT1G53900	580	c21381.graph_c0	1756	1e-159	558	0	196	580	153	1352	0.796	0.713
AT1G53903	126	c27036.graph_c0	951	2e-16	81.3	0	6	96	252	584	0.532	0.432
AT1G53920	385	c20644.graph_c0	1442	1e-114	407	0	46	385	173	1192	0.742	0.562
AT1G54100	508	c20863.graph_c0	2003	0	837	0	1	508	295	1818	0.872	0.797
AT1G54115	644	c34259.graph_c0	2828	0	775	0	14	637	511	2406	0.772	0.618
AT1G54120	124	c27001.graph_c0	658	1e-13	72	0	29	113	222	464	0.682	0.424
AT1G54140	183	c40750.graph_c0	1015	3e-61	231	0	1	131	590	982	0.931	0.832
AT1G54150	383	c40658.graph_c0	1611	9e-94	340	0	1	383	273	1463	0.66	0.453
AT1G54180	344	c28252.graph_c0	1875	1e-116	414	0	1	344	475	1614	0.7	0.572
AT1G54200	366	c26243.graph_c0	1707	8e-36	148	0	105	365	542	1354	0.507	0.377
AT1G54290	113	c40155.graph_c1	1998	2e-56	214	0	1	113	236	574	0.982	0.885
AT1G54310	454	c47722.graph_c0	2757	0	669	0	16	454	1397	2734	0.841	0.702
AT1G54350	706	c49239.graph_c0	3105	0	840	0	57	687	572	2497	0.779	0.657
AT1G54380	515	c46276.graph_c1	2509	2e-56	217	0	285	515	184	870	0.668	0.489
AT1G54385	560	c38536.graph_c0	2806	1e-143	506	0	1	551	313	2232	0.606	0.485
AT1G54390	262	c50360.graph_c0	1292	1e-102	367	0	1	260	415	1194	0.789	0.692
AT1G54400	183	c24209.graph_c0	1160	1e-21	99.8	0	10	106	415	708	0.677	0.505
AT1G54490	947	c47804.graph_c0	3760	0	648	0	345	870	1515	3062	0.76	0.629
AT1G54500	195	c41431.graph_c0	1306	9e-48	186	0	52	173	367	726	0.852	0.672
AT1G54510	612	c45983.graph_c0	3303	0	632	0	1	590	1048	2859	0.674	0.56
AT1G54520	391	c26631.graph_c0	1563	6e-94	341	0	178	385	285	905	0.909	0.784
AT1G54540	239	c33964.graph_c1	1149	1e-50	196	0	76	239	321	812	0.75	0.543
AT1G54570	704	c41442.graph_c0	2523	0	826	0	25	704	366	2408	0.757	0.594
AT1G54650	299	c47850.graph_c2	1990	4e-49	192	0	184	297	395	736	0.868	0.781
AT1G54690	142	c38043.graph_c0	895	4e-49	190	0	22	142	342	707	0.828	0.811
AT1G54710	927	c48561.graph_c0	3887	0	791	0	16	885	699	3461	0.62	0.494
AT1G54730	470	c47397.graph_c0	2158	1e-157	392	0	162	468	359	1279	0.765	0.616
AT1G54740	299	c45551.graph_c0	1621	2e-12	70.5	0	19	145	693	1160	0.471	0.325
AT1G54790	383	c49919.graph_c0	2630	1e-162	567	0	30	383	238	1299	0.864	0.723
AT1G54820	458	c49449.graph_c0	2422	1e-117	418	0	88	444	584	1771	0.656	0.533
AT1G54850	206	c42421.graph_c0	2283	4e-49	191	0	26	201	1516	2049	0.733	0.522
AT1G54870	335	c50482.graph_c0	1394	1e-137	486	0	53	335	269	1117	0.905	0.792
AT1G54920	890	c46306.graph_c0	2343	3e-64	244	0	369	882	240	1634	0.495	0.309
AT1G54990	473	c45935.graph_c3	2717	1e-122	435	0	34	442	104	1363	0.692	0.52
AT1G55000	221	c35544.graph_c0	1426	1e-85	312	0	2	220	184	834	0.817	0.685
AT1G55020	859	c39777.graph_c0	3219	0	1041	0	44	859	362	2824	0.769	0.61
AT1G55040	849	c47953.graph_c0	3165	1e-147	520	0	51	493	34	1368	0.704	0.584
AT1G55080	244	c41780.graph_c0	1153	2e-31	133	0	150	243	415	696	0.84	0.649
AT1G55090	725	c94150.graph_c0	394	9e-27	119	0	389	516	1	390	0.656	0.481
AT1G55110	455	c42686.graph_c0	1084	4e-82	302	0	17	232	185	865	0.739	0.643
AT1G55120	594	c32691.graph_c0	1986	1e-176	615	0	1	573	160	1878	0.693	0.524
AT1G55150	501	c41476.graph_c0	2227	0	464	0	222	501	953	1798	0.866	0.803
AT1G55160	137	c28058.graph_c0	967	3e-35	144	0	14	137	262	639	0.727	0.602
AT1G55230	300	c34989.graph_c0	1741	2e-99	359	0	1	293	254	1135	0.744	0.555
AT1G55250	383	c45908.graph_c1	3382	1e-117	420	0	4	383	407	1546	0.703	0.571
AT1G55265	175	c20815.graph_c0	851	4e-33	137	0	46	166	217	585	0.675	0.545
AT1G55270	434	c38432.graph_c0	2338	0	690	0	8	434	585	1877	0.868	0.761
AT1G55280	390	c40964.graph_c0	2178	5e-30	129	0	50	171	1499	1891	0.672	0.504
AT1G55300	203	c46244.graph_c0	2467	7e-31	130	0	1	138	1095	1613	0.586	0.46
AT1G55310	220	c41628.graph_c0	1710	1e-21	100	0	75	126	1029	1184	0.962	0.885
AT1G55325	2001	c48901.graph_c0	6551	0	1608	0	240	1903	369	5516	0.647	0.509
AT1G55340	205	c37056.graph_c0	1186	2e-46	182	0	12	205	240	869	0.656	0.526
AT1G55350	2151	c45882.graph_c0	7933	0	2849	0	1	2151	668	7141	0.758	0.669
AT1G55360	422	c34662.graph_c0	2360	0	690	0	25	422	746	1942	0.9	0.813
AT1G55370	308	c39056.graph_c0	2159	9e-35	144	0	61	291	572	1375	0.515	0.333
AT1G55460	411	c48288.graph_c0	4230	1e-140	496	0	1	411	329	1525	0.733	0.627
AT1G55480	335	c25874.graph_c0	1822	1e-109	392	0	96	335	404	1126	0.892	0.776
AT1G55520	200	c36529.graph_c0	1283	1e-108	386	0	1	200	389	988	0.97	0.93
AT1G55540	1816	c48717.graph_c1	3361	1e-123	440	0	4	422	213	1454	0.701	0.512
AT1G55570	555	c50399.graph_c0	2217	0	810	0	7	553	532	2172	0.802	0.698
AT1G55620	781	c43668.graph_c0	3235	0	842	0	119	766	635	2593	0.751	0.667
AT1G55630	477	c35177.graph_c0	2109	1e-168	587	0	1	476	127	1584	0.758	0.571
AT1G55670	160	c37292.graph_c0	860	7e-52	199	0	27	159	248	640	0.857	0.767
AT1G55740	754	c43342.graph_c0	2688	0	1095	0	1	750	57	2297	0.819	0.69
AT1G55760	329	c44156.graph_c0	1807	1e-142	501	0	1	329	537	1520	0.875	0.699
AT1G55790	515	c35280.graph_c0	1048	6e-42	169	0	21	222	220	828	0.601	0.438
AT1G55810	466	c30318.graph_c0	2241	0	709	0	1	426	312	1598	0.879	0.795
AT1G55830	412	c46707.graph_c0	2602	1e-24	111	0	229	337	1413	1739	0.734	0.532
AT1G55840	325	c48351.graph_c0	2081	1e-87	320	0	119	324	509	1114	0.84	0.718
AT1G55850	729	c48053.graph_c0	2298	0	777	0	19	720	106	2256	0.692	0.533
AT1G55860	3681	c48734.graph_c0	12199	0	4060	0	1	3681	351	11636	0.702	0.578
AT1G55870	689	c48727.graph_c0	3234	1e-82	305	0	36	275	2504	3211	0.779	0.621
AT1G55880	421	c41081.graph_c1	1942	1e-146	513	0	91	420	652	1641	0.855	0.727
AT1G55900	370	c40881.graph_c0	1643	1e-87	316	0	151	370	578	1258	0.824	0.67
AT1G55910	326	c44542.graph_c0	1557	5e-98	354	0	17	326	228	1217	0.696	0.572
AT1G55915	404	c43153.graph_c0	1878	2e-97	353	0	6	404	383	1663	0.584	0.458
AT1G56010	324	c36491.graph_c0	1379	2e-78	289	0	2	323	127	1116	0.595	0.461
AT1G56050	421	c41322.graph_c0	1762	0	638	0	1	421	389	1660	0.829	0.759
AT1G56070	843	c49413.graph_c1	3904	0	1597	0	1	843	354	2882	0.944	0.9
AT1G56090	272	c42032.graph_c0	846	2e-24	109	0	54	125	270	485	0.847	0.736
AT1G56110	522	c43408.graph_c0	2038	0	739	0	1	429	641	1918	0.916	0.811
AT1G56140	1033	c47816.graph_c1	4830	0	1024	0	15	908	1838	4531	0.708	0.58
AT1G56180	389	c39663.graph_c0	1984	1e-142	503	0	47	387	198	1214	0.862	0.736
AT1G56190	405	c43773.graph_c0	1997	0	677	0	1	405	489	1703	0.886	0.842
AT1G56220	137	c30463.graph_c0	714	4e-22	100	0	1	69	62	262	0.826	0.725
AT1G56230	752	c44361.graph_c1	1868	1e-136	481	0	216	751	191	1831	0.623	0.471
AT1G56260	127	c44993.graph_c0	1136	3e-28	120	0	1	120	500	853	0.742	0.492
AT1G56290	692	c46313.graph_c1	2997	0	674	0	72	691	916	2766	0.722	0.589
AT1G56300	156	c20897.graph_c0	1443	2e-50	195	0	14	156	594	1022	0.783	0.615
AT1G56310	589	c40439.graph_c0	3162	1e-173	606	0	50	553	1012	2520	0.75	0.586
AT1G56330	193	c40227.graph_c0	1246	6e-84	306	0	1	193	309	887	0.803	0.782
AT1G56345	322	c47400.graph_c0	2238	1e-93	340	0	54	320	1127	1945	0.717	0.594
AT1G56350	482	c48674.graph_c2	4990	1e-90	331	0	281	461	4053	4595	0.928	0.862
AT1G56420	183	c39765.graph_c0	1477	1e-56	216	0	1	162	391	858	0.815	0.685
AT1G56423	270	c35661.graph_c0	1302	1e-79	293	0	2	239	233	934	0.794	0.613
AT1G56440	476	c38441.graph_c0	1711	1e-115	412	0	12	476	134	1498	0.642	0.494
AT1G56450	246	c25933.graph_c0	1220	1e-114	407	0	8	246	165	884	0.904	0.796
AT1G56460	502	c34056.graph_c0	1210	3e-65	246	0	324	502	354	911	0.765	0.652
AT1G56500	1055	c43534.graph_c0	3587	0	1472	0	37	1051	327	3422	0.804	0.684
AT1G56560	616	c43994.graph_c1	4748	0	706	0	203	612	3087	4322	0.871	0.791
AT1G56570	611	c23553.graph_c0	1088	1e-116	416	0	13	360	65	1087	0.724	0.557
AT1G56580	166	c26552.graph_c0	1024	5e-46	180	0	1	144	477	908	0.779	0.607
AT1G56590	415	c47566.graph_c0	3071	0	465	0	1	269	207	1016	0.911	0.804
AT1G56600	335	c25571.graph_c0	1502	1e-153	538	0	3	335	376	1362	0.856	0.766
AT1G56700	219	c26309.graph_c0	1339	9e-79	290	0	1	217	316	975	0.759	0.636
AT1G56720	492	c48226.graph_c0	4710	1e-180	629	0	4	492	2683	4191	0.731	0.65
AT1G57590	444	c20876.graph_c0	1694	1e-158	554	0	43	442	107	1315	0.777	0.665
AT1G57600	533	c47020.graph_c1	2264	0	791	0	9	527	242	1795	0.859	0.699
AT1G57680	362	c39854.graph_c0	2080	2e-66	250	0	1	305	516	1445	0.577	0.452
AT1G57720	413	c20952.graph_c0	3001	1e-169	590	0	1	413	312	1556	0.773	0.699
AT1G57770	574	c35439.graph_c0	3223	6e-98	355	0	50	277	2165	2848	0.851	0.763
AT1G57790	352	c35933.graph_c0	2208	3e-79	292	0	2	347	989	2035	0.637	0.436
AT1G57820	645	c43370.graph_c0	2758	0	737	0	6	598	874	2607	0.714	0.596
AT1G57870	420	c37457.graph_c0	2535	0	712	0	3	420	328	1587	0.893	0.807
AT1G58025	572	c40489.graph_c0	1678	4e-54	209	0	210	360	57	533	0.711	0.61
AT1G58030	635	c49413.graph_c0	3833	0	822	0	19	635	1372	3228	0.778	0.655
AT1G58060	1459	c47741.graph_c1	2340	0	771	0	814	1379	639	2339	0.814	0.657
AT1G58070	284	c42405.graph_c0	1250	1e-15	80.9	0	129	258	298	681	0.552	0.418
AT1G58080	411	c40773.graph_c0	1913	1e-165	579	0	74	411	374	1387	0.908	0.808
AT1G58110	374	c42539.graph_c0	2301	1e-83	307	0	1	367	659	1762	0.643	0.496
AT1G58120	420	c28923.graph_c0	2066	3e-65	246	0	101	420	186	1118	0.599	0.435
AT1G58170	185	c21105.graph_c0	1019	2e-62	235	0	1	185	160	741	0.735	0.612
AT1G58220	834	c47081.graph_c0	2361	6e-54	209	0	1	278	1282	2061	0.599	0.461
AT1G58230	2604	c49329.graph_c0	10719	0	2272	0	933	2604	5155	10191	0.798	0.652
AT1G58250	2607	c48771.graph_c0	8968	0	2311	0	542	2371	1424	6970	0.748	0.632
AT1G58290	543	c45595.graph_c0	2484	0	760	0	1	543	241	1902	0.764	0.7
AT1G58310	505	c45606.graph_c1	1838	1e-35	147	0	1	336	35	994	0.481	0.339
AT1G58330	225	c1091.graph_c0	1215	4e-27	118	0	14	225	391	1026	0.512	0.323
AT1G58340	532	c44487.graph_c0	2139	0	643	0	42	515	447	1865	0.765	0.675
AT1G58350	794	c46748.graph_c1	4038	0	822	0	1	694	469	2583	0.704	0.59
AT1G58440	531	c44779.graph_c0	3190	0	755	0	75	521	1458	2801	0.908	0.806
AT1G58684	284	c48616.graph_c0	1275	1e-114	407	0	52	267	242	886	0.963	0.898
AT1G59530	148	c4600.graph_c0	575	5e-09	57.4	0	7	133	127	504	0.492	0.346
AT1G59600	324	c27411.graph_c0	1513	1e-96	350	0	2	324	377	1396	0.702	0.535
AT1G59640	343	c40065.graph_c0	2756	6e-61	231	0	1	222	1745	2407	0.684	0.615
AT1G59650	492	c42309.graph_c0	2165	1e-163	572	0	1	492	305	1810	0.681	0.562
AT1G59720	638	c48681.graph_c0	4063	1e-175	612	0	92	638	272	1945	0.67	0.536
AT1G59740	591	c46256.graph_c0	3585	0	780	0	27	573	370	2034	0.795	0.695
AT1G59750	665	c49199.graph_c0	2910	0	722	0	6	609	295	2055	0.71	0.617
AT1G59760	988	c44994.graph_c0	3929	0	1302	0	1	808	1433	3856	0.875	0.771
AT1G59820	1213	c42099.graph_c1	2919	0	1441	0	21	879	1	2601	0.886	0.78
AT1G59870	1469	c47771.graph_c0	6480	0	2010	0	32	1469	1842	6191	0.79	0.662
AT1G59940	231	c45581.graph_c0	2316	2e-57	219	0	1	174	1615	2127	0.8	0.651
AT1G59950	320	c43604.graph_c0	1977	1e-116	416	0	15	320	770	1684	0.837	0.608
AT1G59990	581	c44073.graph_c0	2101	1e-174	607	0	71	566	330	1811	0.731	0.591
AT1G60000	258	c36459.graph_c0	1476	4e-76	281	0	83	257	503	1024	0.897	0.743
AT1G60010	173	c43142.graph_c0	1701	2e-42	168	0	1	173	189	695	0.672	0.546
AT1G60030	538	c39792.graph_c0	2447	0	870	0	13	538	477	2054	0.88	0.795
AT1G60060	386	c26941.graph_c0	1578	1e-108	390	0	1	310	516	1484	0.69	0.628
AT1G60070	862	c45071.graph_c0	3594	0	1355	0	1	862	360	2990	0.851	0.744
AT1G60080	302	c44712.graph_c0	2554	6e-67	251	0	1	182	164	709	0.775	0.659
AT1G60170	485	c41843.graph_c0	2178	1e-169	593	0	1	483	499	1947	0.761	0.691
AT1G60190	686	c38888.graph_c0	2451	1e-147	519	0	1	684	295	2343	0.61	0.427
AT1G60200	899	c47319.graph_c0	4052	1e-129	461	0	139	899	306	2561	0.564	0.415
AT1G60220	584	c46465.graph_c0	2410	8e-88	322	0	64	577	529	1989	0.544	0.365
AT1G60230	458	c33727.graph_c0	1563	1e-167	586	0	90	457	372	1475	0.84	0.739
AT1G60360	327	c40871.graph_c1	1005	8e-61	231	0	1	323	26	994	0.571	0.432
AT1G60420	578	c45747.graph_c0	2265	0	662	0	13	578	91	1788	0.714	0.564
AT1G60430	174	c81315.graph_c0	396	2e-24	108	0	47	169	2	376	0.632	0.408
AT1G60460	493	c39950.graph_c0	1794	8e-92	335	0	7	450	42	1496	0.559	0.402
AT1G60490	814	c47446.graph_c0	3505	0	885	0	1	579	328	2067	0.842	0.743
AT1G60550	337	c37928.graph_c0	1625	1e-148	521	0	6	337	235	1227	0.849	0.754
AT1G60560	500	c45967.graph_c0	3091	0	820	0	1	500	1190	2689	0.886	0.74
AT1G60600	287	c49295.graph_c0	2003	3e-21	99.8	0	11	118	824	1147	0.556	0.481
AT1G60620	385	c42333.graph_c0	1748	1e-133	472	0	33	385	41	1093	0.782	0.661
AT1G60640	298	c39304.graph_c0	1441	6e-13	72	0	107	153	594	734	0.851	0.553
AT1G60650	292	c39451.graph_c0	2371	4e-36	149	0	11	137	1691	2098	0.662	0.566
AT1G60670	254	c43671.graph_c2	2735	2e-46	182	0	1	247	1457	2254	0.583	0.424
AT1G60690	345	c50080.graph_c0	1580	1e-135	478	0	1	343	375	1385	0.796	0.673
AT1G60770	491	c38091.graph_c0	2522	0	662	0	8	490	480	1925	0.787	0.636
AT1G60780	428	c37553.graph_c0	2779	0	832	0	1	428	947	2230	0.972	0.907
AT1G60790	541	c22558.graph_c0	1589	1e-148	521	0	188	519	606	1589	0.846	0.699
AT1G60800	632	c48105.graph_c0	3433	0	902	0	11	632	667	2511	0.812	0.711
AT1G60860	776	c37255.graph_c0	2873	0	934	0	1	776	210	2555	0.756	0.599
AT1G60870	147	c35594.graph_c0	1377	3e-14	74.7	0	1	147	321	761	0.401	0.306
AT1G60900	589	c43820.graph_c0	2661	1e-170	594	0	215	588	362	1486	0.856	0.763
AT1G60930	1150	c36225.graph_c0	2257	0	583	0	606	977	2	1123	0.832	0.733
AT1G60950	148	c37220.graph_c0	847	1e-35	145	0	1	148	92	526	0.649	0.507
AT1G60995	623	c45399.graph_c0	2731	0	411	0	1	346	299	1456	0.668	0.558
AT1G61010	693	c37499.graph_c0	2558	0	1202	0	1	693	209	2293	0.927	0.816
AT1G61040	643	c42923.graph_c0	2455	1e-161	566	0	54	643	431	2188	0.64	0.51
AT1G61140	1122	c46615.graph_c1	4626	0	914	0	354	1120	582	2915	0.711	0.605
AT1G61150	226	c26827.graph_c0	1409	8e-97	350	0	1	225	441	1115	0.831	0.764
AT1G61210	1181	c47990.graph_c0	2913	1e-163	573	0	1	352	1611	2684	0.848	0.718
AT1G61215	475	c48888.graph_c0	1541	3e-23	107	0	268	364	685	978	0.806	0.633
AT1G61260	344	c21215.graph_c0	1392	1e-41	167	0	189	343	113	568	0.734	0.563
AT1G61330	447	c39416.graph_c0	1957	4e-19	93.6	0	11	428	376	1653	0.443	0.259
AT1G61340	231	c38461.graph_c0	1345	8e-15	51.2	0	161	230	834	1031	0.606	0.437
AT1G61350	573	c45012.graph_c0	2406	1e-142	502	0	34	573	389	1993	0.673	0.52
AT1G61415	167	c8216.graph_c0	340	9e-22	99.8	0	1	113	2	316	0.664	0.504
AT1G61520	273	c37119.graph_c0	2668	1e-114	409	0	19	273	415	1179	0.843	0.792
AT1G61570	87	c20810.graph_c0	931	1e-15	79	0	26	87	536	721	0.742	0.597
AT1G61580	390	c44757.graph_c0	1315	1e-146	513	0	1	385	10	1155	0.787	0.639
AT1G61590	424	c43859.graph_c0	1678	1e-168	588	0	8	409	283	1506	0.819	0.702
AT1G61620	310	c44013.graph_c0	1407	1e-131	465	0	1	309	261	1166	0.819	0.725
AT1G61660	347	c40993.graph_c0	2279	6e-30	129	0	246	336	954	1244	0.753	0.649
AT1G61670	513	c40408.graph_c0	2245	1e-179	626	0	6	513	414	1979	0.757	0.626
AT1G61690	1171	c47554.graph_c0	2387	1e-107	385	0	33	549	701	2314	0.601	0.437
AT1G61700	71	c21286.graph_c0	705	1e-33	138	0	1	71	109	321	0.972	0.901
AT1G61720	340	c51052.graph_c0	1303	1e-109	393	0	10	338	170	1159	0.724	0.57
AT1G61770	300	c41728.graph_c0	1623	1e-116	414	0	1	300	19	915	0.793	0.653
AT1G61780	98	c21126.graph_c0	715	3e-44	173	0	1	98	280	567	0.878	0.857
AT1G61790	346	c48800.graph_c0	1598	1e-121	431	0	36	345	119	1045	0.81	0.669
AT1G61800	388	c26455.graph_c0	1812	1e-155	546	0	46	387	433	1464	0.895	0.811
AT1G61850	1311	c47355.graph_c0	4658	0	888	0	20	607	2487	4241	0.852	0.748
AT1G61870	408	c21357.graph_c0	1724	1e-116	414	0	38	406	240	1343	0.702	0.539
AT1G61900	433	c38006.graph_c0	2269	1e-138	490	0	31	412	587	1735	0.769	0.603
AT1G62020	1216	c42911.graph_c0	4418	0	2035	0	1	1216	255	3905	0.877	0.795
AT1G62050	624	c40433.graph_c0	2187	0	669	0	1	598	219	2024	0.694	0.57
AT1G62250	267	c26510.graph_c0	1424	8e-86	313	0	1	267	256	1086	0.699	0.599
AT1G62280	385	c61819.graph_c0	844	4e-64	242	0	38	256	1	678	0.721	0.566
AT1G62290	513	c37295.graph_c0	2234	0	720	0	27	512	287	1747	0.821	0.684
AT1G62305	378	c46329.graph_c0	1742	1e-118	421	0	17	367	276	1319	0.717	0.575
AT1G62310	883	c26371.graph_c0	2226	1e-158	556	0	209	714	11	1480	0.684	0.523
AT1G62330	652	c40350.graph_c0	2353	0	700	0	172	649	498	2021	0.804	0.69
AT1G62350	196	c43197.graph_c0	665	1e-55	213	0	1	131	3	395	0.893	0.779
AT1G62360	382	c46270.graph_c3	1514	6e-98	354	0	121	382	262	1065	0.79	0.713
AT1G62390	751	c42679.graph_c0	3072	0	803	0	37	747	435	2612	0.687	0.583
AT1G62400	345	c34942.graph_c0	1980	1e-174	607	0	2	345	746	1765	0.896	0.841
AT1G62500	297	c42900.graph_c0	1118	1e-27	120	0	212	297	246	503	0.93	0.802
AT1G62520	280	c39710.graph_c0	1203	3e-62	235	0	1	280	30	905	0.572	0.444
AT1G62600	452	c42693.graph_c0	2003	1e-145	337	0	188	451	784	1698	0.649	0.538
AT1G62640	404	c48660.graph_c0	2051	2e-97	353	0	188	403	869	1513	0.884	0.787
AT1G62710	486	c38834.graph_c0	1733	0	679	0	21	486	89	1510	0.796	0.67
AT1G62730	304	c48782.graph_c0	1408	1e-125	445	0	9	304	264	1145	0.851	0.706
AT1G62740	571	c44672.graph_c0	2278	0	843	0	1	571	252	1997	0.818	0.691
AT1G62750	783	c47950.graph_c0	4340	0	1303	0	79	783	1792	3906	0.952	0.896
AT1G62780	237	c37216.graph_c0	1201	7e-88	320	0	1	237	388	1083	0.828	0.655
AT1G62830	844	c41895.graph_c0	3038	0	855	0	157	835	512	2533	0.751	0.644
AT1G62850	236	c28585.graph_c0	1272	1e-69	259	0	1	235	173	862	0.724	0.573
AT1G62870	762	c44302.graph_c0	1143	3e-35	147	0	33	111	474	710	0.924	0.785
AT1G62940	542	c35719.graph_c0	2075	0	731	0	7	536	125	1729	0.8	0.656
AT1G62990	291	c39845.graph_c0	1923	1e-128	453	0	21	290	395	1213	0.884	0.787
AT1G63000	301	c39841.graph_c0	1340	1e-153	538	0	1	301	187	1095	0.917	0.848
AT1G63020	1453	c47266.graph_c0	4999	0	1299	0	1	1445	145	4476	0.651	0.467
AT1G63060	148	c50960.graph_c0	583	3e-17	84.7	0	19	141	116	472	0.545	0.366
AT1G63100	658	c45965.graph_c1	2831	1e-167	585	0	32	653	919	2781	0.628	0.514
AT1G63110	469	c39122.graph_c0	1963	1e-162	570	0	3	464	424	1821	0.758	0.624
AT1G63120	317	c43049.graph_c0	1670	2e-84	309	0	1	317	384	1355	0.607	0.506
AT1G63160	333	c39043.graph_c0	1721	1e-179	624	0	1	332	86	1072	0.952	0.892
AT1G63220	147	c25400.graph_c0	943	3e-50	194	0	1	147	204	638	0.776	0.639
AT1G63250	798	c41944.graph_c0	2800	0	681	0	268	798	860	2464	0.792	0.634
AT1G63260	277	c44385.graph_c0	1256	2e-58	218	0	94	230	442	852	0.891	0.803
AT1G63290	227	c36607.graph_c0	1363	1e-107	385	0	2	224	197	865	0.892	0.821
AT1G63300	1029	c48530.graph_c0	4693	1e-133	472	0	1	688	2100	4136	0.589	0.433
AT1G63310	154	c27280.graph_c0	1523	1e-20	96.3	0	1	142	340	798	0.592	0.395
AT1G63430	664	c37653.graph_c0	2477	0	850	0	11	664	385	2343	0.759	0.631
AT1G63440	995	c48429.graph_c0	6599	0	948	0	2	659	4576	6522	0.832	0.703
AT1G63450	664	c29058.graph_c0	2073	1e-152	537	0	30	662	1	1851	0.615	0.434
AT1G63460	167	c26877.graph_c0	1000	7e-76	279	0	3	167	116	610	0.915	0.764
AT1G63470	378	c37813.graph_c0	2186	4e-59	225	0	1	378	646	1680	0.51	0.417
AT1G63490	1116	c47392.graph_c0	6243	0	951	0	1	974	1903	4794	0.681	0.485
AT1G63610	340	c46068.graph_c1	1472	1e-118	421	0	75	340	442	1233	0.861	0.778
AT1G63640	1071	c49013.graph_c1	5079	0	1092	0	33	1066	445	3525	0.718	0.556
AT1G63660	534	c25607.graph_c0	2113	0	869	0	1	534	191	1795	0.88	0.787
AT1G63680	772	c48352.graph_c0	5759	0	979	0	25	772	3159	5402	0.765	0.673
AT1G63690	540	c45354.graph_c0	3079	0	810	0	24	530	1340	2854	0.856	0.761
AT1G63700	883	c37299.graph_c0	4164	0	718	0	19	880	723	3371	0.603	0.511
AT1G63770	895	c40644.graph_c0	3491	0	1497	0	1	895	642	3305	0.879	0.802
AT1G63800	185	c34918.graph_c1	772	4e-72	267	0	12	150	355	771	0.928	0.899
AT1G63810	1053	c46101.graph_c0	3632	0	1286	0	13	1052	219	3338	0.759	0.603
AT1G63830	232	c26600.graph_c0	1580	3e-95	345	0	3	199	323	913	0.893	0.797
AT1G63850	548	c37541.graph_c0	2361	0	663	0	27	547	628	2094	0.758	0.651
AT1G63855	196	c42649.graph_c0	1685	6e-51	197	0	9	141	176	580	0.822	0.681
AT1G63900	347	c20800.graph_c0	1943	1e-156	547	0	1	347	451	1455	0.87	0.755
AT1G63910	370	c38690.graph_c0	1375	4e-71	265	0	1	347	187	1227	0.546	0.446
AT1G63930	415	c36647.graph_c0	1907	1e-106	383	0	6	415	134	1360	0.639	0.469
AT1G63940	486	c41960.graph_c0	2234	0	708	0	16	473	388	1728	0.854	0.769
AT1G63970	231	c25421.graph_c0	1392	2e-83	305	0	73	231	417	893	0.969	0.912
AT1G63980	391	c39051.graph_c0	2465	5e-53	205	0	1	152	1916	2356	0.77	0.678
AT1G63990	383	c47228.graph_c1	2028	1e-129	294	0	58	271	309	1007	0.73	0.592
AT1G64000	195	c55867.graph_c0	666	6e-44	174	0	101	191	165	437	0.945	0.802
AT1G64040	322	c35871.graph_c0	1661	1e-156	549	0	1	298	550	1443	0.94	0.852
AT1G64050	668	c41220.graph_c0	2633	3e-64	243	0	144	560	532	1806	0.581	0.378
AT1G64060	944	c42654.graph_c0	3895	0	1384	0	1	944	735	3551	0.831	0.716
AT1G64140	646	c47429.graph_c0	2944	1e-173	605	0	1	621	503	2401	0.643	0.549
AT1G64150	370	c44165.graph_c0	1679	1e-75	280	0	97	354	420	1193	0.695	0.595
AT1G64230	148	c20962.graph_c0	1051	5e-83	303	0	1	148	376	819	0.986	0.973
AT1G64280	593	c36957.graph_c0	2353	1e-139	491	0	49	563	427	2004	0.668	0.506
AT1G64300	717	c44007.graph_c0	1456	1e-162	569	0	107	562	3	1358	0.754	0.603
AT1G64310	552	c47275.graph_c0	3641	1e-164	575	0	7	551	291	1922	0.703	0.505
AT1G64350	326	c40907.graph_c0	1535	1e-114	409	0	54	323	418	1227	0.833	0.696
AT1G64355	199	c49740.graph_c0	1988	2e-26	115	0	48	127	242	466	0.813	0.75
AT1G64380	335	c41308.graph_c0	1570	2e-45	179	0	18	232	374	973	0.596	0.469
AT1G64385	351	c41165.graph_c0	1859	2e-38	156	0	110	351	349	1029	0.521	0.409
AT1G64390	620	c42432.graph_c0	2965	0	951	0	16	620	467	2299	0.845	0.729
AT1G64405	118	c25417.graph_c0	848	3e-08	54.3	0	1	118	108	452	0.516	0.365
AT1G64430	559	c47581.graph_c0	3171	4e-72	269	0	189	410	1788	2456	0.794	0.619
AT1G64500	368	c36625.graph_c0	1707	3e-77	285	0	1	365	219	1346	0.586	0.466
AT1G64510	207	c37275.graph_c0	1198	4e-52	201	0	24	188	503	994	0.673	0.642
AT1G64520	267	c26414.graph_c0	1365	1e-111	397	0	1	267	385	1185	0.816	0.719
AT1G64530	841	c41598.graph_c0	3428	0	703	0	1	578	111	1880	0.714	0.607
AT1G64550	715	c48006.graph_c0	2939	0	1149	0	1	714	570	2720	0.861	0.781
AT1G64570	1239	c36525.graph_c0	5004	1e-140	498	0	46	947	1571	4498	0.499	0.351
AT1G64600	537	c46325.graph_c0	1635	1e-20	98.6	0	443	508	652	849	0.803	0.606
AT1G64625	503	c46347.graph_c0	3017	4e-82	302	0	3	493	633	2465	0.493	0.342
AT1G64640	191	c34141.graph_c0	1036	8e-37	150	0	26	157	428	844	0.647	0.547
AT1G64660	441	c44502.graph_c0	1707	1e-180	627	0	17	438	249	1511	0.827	0.706
AT1G64680	250	c40026.graph_c0	1533	1e-106	379	0	20	250	390	1085	0.845	0.772
AT1G64690	273	c38643.graph_c0	1225	5e-18	88.6	0	39	261	119	1000	0.432	0.282
AT1G64700	203	c46185.graph_c0	917	5e-34	141	0	1	183	47	574	0.571	0.44
AT1G64720	385	c36937.graph_c0	2755	1e-127	451	0	80	385	625	1560	0.805	0.687
AT1G64770	348	c37587.graph_c0	1388	3e-97	352	0	31	348	147	1175	0.669	0.52
AT1G64780	514	c37173.graph_c0	2014	0	689	0	38	491	432	1793	0.821	0.772
AT1G64790	2610	c46147.graph_c0	8599	0	3399	0	23	2595	207	7928	0.801	0.669
AT1G64810	436	c41645.graph_c0	2061	1e-143	504	0	72	436	763	1848	0.775	0.641
AT1G64850	162	c40214.graph_c0	1173	1e-67	252	0	1	161	336	818	0.882	0.714
AT1G64860	502	c37064.graph_c0	2099	1e-174	607	0	1	502	332	1819	0.75	0.613
AT1G64870	304	c83869.graph_c0	208	3e-09	59.7	0	103	166	14	205	0.609	0.5
AT1G64880	515	c47254.graph_c0	2692	1e-133	472	0	51	513	833	2254	0.665	0.52
AT1G64890	442	c45709.graph_c0	3315	1e-125	445	0	21	440	256	1527	0.696	0.541
AT1G64950	510	c44346.graph_c0	2121	1e-161	564	0	36	508	299	1738	0.706	0.561
AT1G64960	1203	c44151.graph_c0	3943	0	935	0	1	1155	313	3918	0.596	0.439
AT1G64970	348	c28033.graph_c0	1397	1e-113	405	0	60	347	283	1137	0.792	0.719
AT1G64980	259	c25679.graph_c0	1438	1e-114	409	0	14	241	350	1027	0.921	0.816
AT1G65000	83	c36068.graph_c0	1739	5e-15	77	0	32	83	1371	1514	0.75	0.692
AT1G65020	319	c40230.graph_c0	2196	1e-115	411	0	1	319	915	1883	0.786	0.622
AT1G65030	345	c41135.graph_c0	1925	1e-109	393	0	1	344	807	1826	0.736	0.574
[truncated: 8,513 more rows]

## Sheet: HSP-31
query_name	query_length	accession_number	length	E value	bit score	frame	query_start	query_end	hit_start	hit_end	positives	identical
AT1G06460	285	c40240.graph_c0	1645	1e-49	194	0	18	285	514	1410	0.545	0.372
AT1G11660	763	c49506.graph_c1	4433	0	890	0	1	763	378	2714	0.72	0.571
AT1G52560	232	c21258.graph_c0	1124	6e-38	154	0	10	231	159	851	0.577	0.444
AT1G54400	183	c24209.graph_c0	1160	1e-21	99.8	0	10	106	415	708	0.677	0.505
AT1G74310	911	c26509.graph_c0	3632	0	1442	0	1	896	632	3319	0.88	0.803
AT1G76770	244	c31781.graph_c0	1210	2e-28	123	0	1	132	555	947	0.705	0.508
AT1G79920	831	c37611.graph_c0	3431	0	1232	0	1	826	517	3036	0.803	0.709
AT2G04030	780	c41893.graph_c0	2887	0	1191	0	1	780	304	2676	0.826	0.747
AT2G25140	964	c47403.graph_c2	3369	0	1436	0	37	964	307	3141	0.843	0.762
AT2G27140	224	c43158.graph_c0	1045	2e-25	113	0	8	195	180	713	0.541	0.345
AT2G29500	153	c34450.graph_c0	892	4e-51	197	0	1	152	181	648	0.731	0.641
AT2G32120	563	c21048.graph_c0	2520	0	874	0	1	562	359	2068	0.866	0.707
AT3G07770	799	c34712.graph_c0	3025	0	1118	0	1	799	194	2545	0.798	0.693
AT3G22530	198	c33726.graph_c0	1288	1e-23	106	0	59	173	270	623	0.622	0.479
AT4G10250	195	c34308.graph_c0	880	2e-54	209	0	34	192	211	696	0.765	0.623
AT4G14830	152	c45713.graph_c0	3079	4e-24	107	0	1	133	221	619	0.584	0.482
AT4G16660	867	c46711.graph_c0	3212	0	1130	0	25	819	172	2595	0.835	0.678
AT4G24190	823	c40220.graph_c0	2952	0	800	0	340	774	511	1812	0.954	0.883
AT4G24280	718	c33709.graph_c0	2721	0	1127	0	1	718	201	2333	0.857	0.809
AT4G25200	210	c39206.graph_c0	990	2e-15	79.3	0	105	210	326	658	0.613	0.378
AT4G27670	227	c49934.graph_c0	1138	1e-26	117	0	78	227	373	867	0.545	0.394
AT5G02500	521	c47729.graph_c0	2673	0	776	0	1	394	235	1416	0.975	0.934
AT5G04890	366	c43218.graph_c0	1177	9e-18	88.6	0	2	107	113	427	0.604	0.415
AT5G09590	682	c39938.graph_c0	2558	0	1102	0	4	682	188	2215	0.866	0.804
AT5G12020	155	c30472.graph_c0	581	7e-44	172	0	5	135	3	425	0.773	0.624
AT5G15450	968	c44061.graph_c0	3592	0	1614	0	28	964	355	3195	0.911	0.843
AT5G28540	669	c45552.graph_c2	1869	0	813	0	189	645	498	1868	0.917	0.869
AT5G37670	137	c42702.graph_c0	1389	7e-40	159	0	4	137	262	678	0.727	0.587
AT5G54660	192	c42325.graph_c0	2494	7e-51	196	0	5	184	277	795	0.733	0.511
AT5G56030	699	c25959.graph_c0	2552	0	1109	0	1	699	139	2229	0.843	0.807
AT5G59720	161	c49406.graph_c0	1073	2e-62	234	0	1	160	262	744	0.789	0.708

## Sheet: HSF-11
query_name	query_length	accession_number	length	E value	bit score	frame	query_start	query_end	hit_start	hit_end	positives	identical
At1g32330	HSFA1d	AT1G32330	485	c46537.graph_c1	2535	3e-99	359	0	26	375	1086	2186	0.621	0.536
At1g67970	HSFA8a	AT1G67970	374	c25224.graph_c0	1604	3e-68	256	0	17	371	293	1372	0.566	0.437
At2g41690	HSFB3a	AT2G41690	244	c41069.graph_c0	1255	7e-56	214	0	17	244	328	984	0.648	0.539
At3g22830	HSFA6b	AT3G22830	406	c36432.graph_c0	1996	1e-103	371	0	48	402	601	1629	0.706	0.542
At3g24520	HSFC1a	AT3G24520	330	c38515.graph_c0	1408	7e-69	258	0	14	198	763	1341	0.819	0.648
At4g11660	HSFB2b	AT4G11660	377	c20887.graph_c0	2320	2e-71	266	0	53	323	990	1826	0.597	0.502
At4g13980	HSFA5a	AT4G13980	466	c36790.graph_c0	1879	1e-112	401	0	23	466	262	1671	0.62	0.468
At4g18880	HSFA4a	AT4G18880	401	c36988.graph_c0	2620	1e-87	320	0	1	401	1141	2367	0.588	0.464
At4g36990	HSFB1a	AT4G36990	284	c40066.graph_c0	1697	5e-53	204	0	7	206	713	1270	0.655	0.53
At5g16820	HSFA1b	AT5G16820	481	c41611.graph_c0	2761	1e-92	337	0	28	480	326	1747	0.601	0.461
At5g62020	HSFB2a	AT5G62020	299	c47479.graph_c2	2428	8e-71	264	0	16	299	717	1637	0.629	0.47

## Sheet: Seed size-28
query_name	query_length	accession_number	length	E value	bit score	frame	query_start	query_end	hit_start	hit_end	positives	identical
AT1G17110	924	c42367.graph_c0	4244	1e-176	617	0	1	723	552	2630	0.581	0.468
AT1G27320	1036	c44384.graph_c0	4360	0	1337	0	1	1029	707	3760	0.755	0.646
AT1G32310	100	c26797.graph_c0	1169	2e-16	81.3	0	29	88	224	406	0.787	0.672
AT1G52340	285	c45451.graph_c0	2643	1e-96	349	0	16	285	229	1029	0.733	0.656
AT1G75450	537	c39590.graph_c0	2161	0	744	0	1	517	219	1751	0.81	0.72
AT1G78420	401	c33328.graph_c0	2692	3e-69	259	0	1	256	390	1154	0.69	0.559
AT2G35230	295	c41150.graph_c0	2596	3e-10	62.8	0	198	248	726	881	0.808	0.712
AT2G36270	442	c45545.graph_c0	1940	2e-44	177	0	312	442	1291	1689	0.81	0.693
AT2G37260	429	c39652.graph_c0	1925	1e-63	241	0	1	405	373	1689	0.522	0.39
AT2G38050	262	c47879.graph_c0	1528	3e-66	248	0	38	262	710	1369	0.693	0.573
AT3G50660	513	c42344.graph_c1	1914	0	669	0	31	512	231	1640	0.793	0.675
AT3G51550	895	c42018.graph_c0	3667	0	1181	0	29	895	496	3078	0.775	0.683
AT3G61880	534	c39774.graph_c0	1913	0	640	0	45	531	202	1662	0.762	0.658
AT3G63530	248	c43307.graph_c0	1692	1e-45	180	0	127	244	1035	1388	0.814	0.686
AT4G02020	856	c46339.graph_c0	5535	0	652	0	198	855	3143	5188	0.615	0.521
AT4G29040	443	c42532.graph_c0	1382	0	695	0	75	443	1	1107	0.957	0.932
AT4G36860	553	c40400.graph_c0	2229	0	656	0	148	553	268	1545	0.824	0.752
AT4G36920	432	c47924.graph_c0	2542	7e-69	258	0	42	261	1604	2284	0.648	0.595
AT4G37750	555	c45196.graph_c0	2879	1e-109	392	0	239	472	1214	1912	0.881	0.804
AT4G39400	1196	c44946.graph_c0	5150	0	1382	0	28	1196	203	3733	0.734	0.612
AT5G20635	251	c29172.graph_c0	1025	1e-16	55.1	0	43	87	566	700	0.733	0.6
AT5G49160	1534	c47477.graph_c0	5273	0	1053	0	770	1527	329	2593	0.795	0.657
AT5G53000	405	c41834.graph_c0	2038	1e-147	519	0	1	405	528	1733	0.775	0.657
AT5G56970	523	c48808.graph_c0	4911	1e-144	509	0	47	519	92	1618	0.676	0.499
AT5G58230	424	c21499.graph_c0	1967	0	785	0	1	414	277	1518	0.944	0.889
AT5G60440	299	c64661.graph_c0	547	3e-21	99.4	0	10	170	3	515	0.526	0.374
AT5G62000	853	c47857.graph_c0	4616	0	905	0	59	838	1336	3678	0.71	0.602
AT5G66750	764	c48343.graph_c0	3041	0	964	0	24	764	578	2818	0.779	0.659

## Sheet: Architecture-11
query_name	query_length	accession_number	length	E value	bit score	frame	query_start	query_end	hit_start	hit_end	positives	identical
AT1G15550	358	c23505.graph_c0	1451	1e-107	384	0	23	353	234	1217	0.723	0.569
AT2G26170	439	c46586.graph_c0	3952	1e-166	455	0	1	330	361	1383	0.78	0.66
AT2G29970	1002	c46887.graph_c0	4169	1e-164	327	0	1	389	311	1618	0.591	0.461
AT2G40130	910	c46970.graph_c0	3494	1e-101	367	0	1	447	145	1527	0.629	0.443
AT2G41850	433	c39695.graph_c0	1028	1e-105	380	0	90	420	5	1012	0.735	0.566
AT2G44990	629	c42234.graph_c1	2070	0	658	0	36	597	236	1909	0.713	0.571
AT2G46770	365	c36236.graph_c0	1931	3e-85	312	0	1	300	666	1655	0.634	0.52
AT3G03990	267	c27762.graph_c0	1453	1e-117	419	0	4	267	467	1258	0.883	0.795
AT3G51240	274	c43798.graph_c0	1974	1e-132	468	0	1	274	661	1503	0.861	0.79
AT4G32810	570	c21189.graph_c0	2481	0	739	0	64	570	369	1871	0.809	0.677
AT5G57710	990	c44133.graph_c0	3949	0	868	0	1	989	386	3517	0.623	0.477

## Sheet: Domestication-39
query_name	query_length	accession_number	length	E value	bit score	frame	query_start	query_end	hit_start	hit_end	positives	identical
tr|A2YN44|A2YN44_ORYSI	342	c20225.graph_c0	1329	6e-26	115	0	171	327	245	679	0.541	0.42
LOC_Os01g66100.1(Sd1)	389	c25220.graph_c0	1340	1e-106	383	0	37	372	130	1140	0.652	0.531
LOC_Os07g15770.1(Ghd7)	287	c26440.graph_c0	1403	1e-07	54.3	0	218	267	284	433	0.64	0.52
LOC_Os09g26999.1(DEP1)	426	c29172.graph_c0	1025	9e-09	40	0	61	92	466	561	0.656	0.469
sp|Q93WI2|TB1_MAIZE	376	c29593.graph_c0	1275	9e-21	98.6	0	115	185	734	970	0.722	0.62
gi|19881735|gb|AAM01136.1|AC108884_18	561	c33145.graph_c0	3475	0	936	0	1	541	413	2041	0.897	0.816
LOC_Os10g25780.1(DWARF1)	589	c33145.graph_c0	3475	0	936	0	29	569	413	2041	0.897	0.816
gi|129563706|gb|ABO31101.1|	425	c33328.graph_c0	2692	9e-59	224	0	1	365	390	1436	0.559	0.441
gi|116248665|gb|ABJ90467.1|	144	c35165.graph_c0	1342	1.2	29.3	0	99	130	1223	1318	0.563	0.438
gi|528080008|gb|AGS18329.1|	257	c35374.graph_c0	960	3e-51	199	0	32	142	438	770	0.928	0.82
tr|E2F1Q0|E2F1Q0_ORYSI	195	c36872.graph_c0	2339	2e-81	298	0	3	195	386	964	0.782	0.705
tr|Q07795|Q07795_SORBI	419	c37820.graph_c0	2164	4e-19	93.2	0	195	301	837	1154	0.729	0.579
gi|169635838|dbj|BAG12386.1|	227	c37937.graph_c0	1201	2e-42	169	0	1	212	126	761	0.533	0.453
LOC_Os05g40384.1(EUI1)	577	c38096.graph_c0	1796	1e-117	420	0	42	555	169	1629	0.588	0.403
gi|85822770|gb|ABC84855.1|	232	c38163.graph_c0	1295	0.0002	43.5	0	20	57	553	666	0.632	0.474
gi|527487110|dbj|BAN66692.1|	525	c41326.graph_c0	1814	1e-136	483	0	94	524	342	1664	0.676	0.554
gi|50058152|dbj|BAD27424.1|	480	c42344.graph_c1	1914	1e-109	391	0	33	479	222	1622	0.637	0.418
LOC_Os10g32600.1(Ehd1)	167	c43137.graph_c0	2764	2e-22	102	0	1	159	1576	2025	0.525	0.4
LOC_Os08g32870.1(BADH2)	503	c43313.graph_c2	3902	0	676	0	81	500	641	1900	0.898	0.76
gi|914342063|gb|AKV61774.1|	196	c44092.graph_c1	3862	0.38	32	0	7	49	1072	1200	0.488	0.326
LOC_Os05g38120.1(SH5)	580	c44123.graph_c0	3255	4e-56	216	0	158	415	1311	2198	0.558	0.409
LOC_Os01g62920.1(qSH1)	612	c44123.graph_c0	3255	2e-43	174	0	171	448	1308	2246	0.473	0.358
gi|379047779|gb|AFC88272.1|	211	c44356.graph_c0	890	1e-25	113	0	59	149	428	700	0.791	0.604
gi|743963507|dbj|BAQ15253.1|	419	c44580.graph_c0	1882	8e-60	228	0	73	418	612	1754	0.479	0.352
LOC_Os07g11020.1(Rc;	473	c45159.graph_c0	2858	4e-17	86.7	0	7	200	1916	2482	0.481	0.322
LOC_Os04g38660.1(Bh4)	229	c45838.graph_c0	1523	1e-60	229	0	6	223	643	1290	0.661	0.509
LOC_Os06g03710.1(DLT)	617	c45965.graph_c1	2831	4e-98	356	0	209	593	1657	2781	0.597	0.481
tr|Q49I54|Q49I54_MAIZE	432	c46515.graph_c0	2739	3e-28	123	0	104	183	1049	1288	0.775	0.637
LOC_Os08g41940.1(GW8)	455	c46515.graph_c0	2739	5e-29	126	0	114	195	1055	1300	0.793	0.646
LOC_Os03g44500.1	1003	c46920.graph_c1	5111	0	1578	0	75	1003	335	3121	0.879	0.839
LOC_Os04g55560.2(SHAT1)	460	c47924.graph_c0	2542	4e-59	226	0	115	235	1622	1984	0.893	0.86
LOC_Os06g40780.1(MOC1)	666	c48361.graph_c6	2700	9e-34	120	0	352	591	1694	2329	0.484	0.348
LOC_Os06g41850.1(TGW6)	350	c49486.graph_c0	4827	6e-73	271	0	54	348	3564	4526	0.627	0.414
LOC_Os08g39890.1(IPA1)	417	c50228.graph_c0	1854	9e-41	165	0	103	416	310	1212	0.485	0.38
gi|393708095|gb|AFN17366.1|	353	c50252.graph_c0	1997	1e-111	399	0	20	353	755	1747	0.719	0.594
LOC_Os04g33740.1(GIF1)	597	c51743.graph_c0	1786	1e-163	572	0	50	583	1	1560	0.675	0.552
LOC_Os04g57530.1(Sh4)	390	c51838.graph_c0	1190	5e-31	132	0	60	201	678	1148	0.573	0.446
LOC_Os01g61480.1(LAX1)	215	c63281.graph_c0	496	3e-17	85.9	0	39	98	77	256	0.85	0.633
LOC_Os07g05900.1(PROG1)	167	c64831.graph_c0	903	3e-09	58.5	0	42	76	732	836	0.857	0.629

## Sheet: Flowering-100
query_name	query_length	accession_number	length	E value	bit score	frame	query_start	query_end	hit_start	hit_end	positives	identical
AT1G02400	329	c39125.graph_c0	1486	1e-87	320	0	1	327	131	1117	0.641	0.507
AT1G04400	612	c42470.graph_c0	2669	0	758	0	1	516	769	2289	0.82	0.676
AT1G06040	177	c21040.graph_c0	1891	7e-52	200	0	1	168	877	1374	0.686	0.615
AT1G08970	231	c37481.graph_c0	1799	2e-54	209	0	67	173	507	827	0.981	0.897
AT1G09570	1122	c42529.graph_c0	4309	0	1699	0	25	1122	552	3839	0.863	0.747
AT1G13260	344	c40613.graph_c0	2631	1e-108	389	0	16	344	1278	2396	0.697	0.568
AT1G14920	533	c40233.graph_c0	2539	0	698	0	18	533	349	2067	0.729	0.624
AT1G17760	734	c36554.graph_c0	2728	0	1001	0	5	728	243	2441	0.782	0.647
AT1G18450	441	c33178.graph_c0	1802	0	723	0	1	441	400	1734	0.857	0.761
AT1G22770	1173	c35573.graph_c0	4663	0	1599	0	7	1171	564	4079	0.785	0.687
AT1G25540	836	c41590.graph_c0	2991	0	719	0	6	679	780	2798	0.702	0.564
AT1G30040	341	c38252.graph_c0	1513	1e-109	393	0	1	332	117	1109	0.752	0.582
AT1G30960	437	c43537.graph_c0	1623	1e-117	419	0	151	437	525	1385	0.805	0.707
AT1G30970	315	c40784.graph_c0	2947	2e-27	119	0	224	294	1359	1577	0.89	0.795
AT1G43700	341	c43776.graph_c1	1249	3e-47	186	0	30	316	301	1203	0.53	0.454
AT1G44446	536	c42385.graph_c0	2267	0	833	0	1	535	580	2172	0.845	0.75
AT1G55080	244	c41780.graph_c0	1153	2e-31	133	0	150	243	415	696	0.84	0.649
AT1G55250	383	c45908.graph_c1	3382	1e-117	420	0	4	383	407	1546	0.703	0.571
AT1G59940	231	c45581.graph_c0	2316	2e-57	219	0	1	174	1615	2127	0.8	0.651
AT1G61040	643	c42923.graph_c0	2455	1e-161	566	0	54	643	431	2188	0.64	0.51
AT1G62750	783	c47950.graph_c0	4340	0	1303	0	79	783	1792	3906	0.952	0.896
AT1G68050	619	c46020.graph_c0	2541	0	883	0	47	619	761	2476	0.822	0.744
AT1G69120	256	c21398.graph_c0	1149	1e-84	310	0	1	255	218	976	0.784	0.624
AT1G72050	324	c43351.graph_c0	2760	2e-88	322	0	2	314	1445	2218	0.642	0.54
AT1G72830	340	c41599.graph_c0	1915	1e-39	160	0	78	333	555	1292	0.521	0.392
AT1G74670	101	c33289.graph_c0	736	4e-30	127	0	20	101	325	576	0.81	0.738
AT2G04030	780	c41893.graph_c0	2887	0	1191	0	1	780	304	2676	0.826	0.747
AT2G18790	1172	c46619.graph_c0	4376	0	1814	0	52	1152	506	3796	0.878	0.783
AT2G19520	507	c37771.graph_c0	1972	0	778	0	50	506	207	1583	0.888	0.794
AT2G20180	407	c44053.graph_c0	2929	2e-26	117	0	200	266	1264	1461	0.94	0.851
AT2G25930	695	c45820.graph_c0	4392	3e-23	107	0	339	513	1060	1587	0.513	0.417
AT2G26710	520	c38474.graph_c0	2005	0	701	0	31	519	362	1882	0.797	0.659
AT2G32950	675	c46257.graph_c0	2608	0	1085	0	3	675	486	2489	0.87	0.778
AT2G39810	927	c44141.graph_c0	3824	0	821	0	1	857	795	3566	0.641	0.481
AT2G42200	375	c50228.graph_c0	1854	6e-39	159	0	32	374	157	1212	0.457	0.35
AT2G44950	878	c47943.graph_c1	3929	0	789	0	1	878	519	3158	0.661	0.495
AT2G45640	152	c48138.graph_c0	800	2e-43	171	0	29	152	268	636	0.806	0.661
AT2G45650	252	c56614.graph_c0	899	5e-54	207	0	1	252	38	814	0.617	0.451
AT2G45660	214	c36421.graph_c0	1486	1e-59	226	0	1	209	469	1101	0.697	0.592
AT3G04910	700	c44838.graph_c0	2786	0	744	0	1	698	299	2458	0.633	0.55
AT3G05690	295	c33389.graph_c0	1608	8e-28	121	0	18	293	503	1372	0.441	0.356
AT3G06930	534	c41013.graph_c0	2451	0	735	0	42	495	388	1752	0.859	0.765
AT3G11540	914	c44864.graph_c1	3630	0	1476	0	45	891	638	3175	0.902	0.826
AT3G15354	837	c46836.graph_c0	3893	0	898	0	1	836	751	3546	0.64	0.514
AT3G15850	371	c35116.graph_c0	1728	1e-129	459	0	100	371	525	1340	0.849	0.75
AT3G18990	341	c22701.graph_c0	1393	6e-36	148	0	6	332	219	1076	0.45	0.305
AT3G24440	602	c29029.graph_c0	3279	1e-142	503	0	45	600	790	2577	0.609	0.463
AT3G26120	615	c30865.graph_c0	2179	1e-64	244	0	375	578	1436	2044	0.695	0.6
AT3G30180	465	c49516.graph_c0	1666	0	667	0	19	465	148	1485	0.848	0.685
AT3G48590	234	c45534.graph_c0	2681	1e-62	236	0	33	208	699	1259	0.72	0.709
AT3G49600	1067	c44239.graph_c0	3983	0	1283	0	1	1066	525	3749	0.738	0.6
AT3G54340	232	c41084.graph_c0	1387	3e-66	248	0	1	230	577	1248	0.722	0.561
AT3G57300	1507	c47983.graph_c0	5592	0	1958	0	13	1492	528	5024	0.767	0.649
AT4G02560	953	c48270.graph_c0	3519	1e-100	364	0	1	320	2353	3303	0.718	0.58
AT4G03400	591	c43340.graph_c1	2373	0	806	0	10	590	351	2099	0.795	0.652
AT4G04890	743	c41025.graph_c0	3302	0	1157	0	1	738	680	2872	0.862	0.776
AT4G08920	681	c41462.graph_c0	3740	0	998	0	15	681	476	2509	0.823	0.737
AT4G11110	1036	c48966.graph_c1	5854	0	815	0	171	1036	2497	5124	0.645	0.491
AT4G14110	197	c35653.graph_c0	904	9e-77	283	0	1	197	121	711	0.832	0.624
AT4G14540	161	c44254.graph_c1	1628	3e-56	214	0	1	126	792	1172	0.898	0.85
AT4G14690	193	c47978.graph_c1	1175	1e-45	179	0	5	193	134	712	0.617	0.513
AT4G15090	827	c48818.graph_c0	3808	0	923	0	8	675	1542	3554	0.781	0.645
AT4G16780	284	c48521.graph_c1	1741	2e-79	293	0	46	284	503	1294	0.688	0.606
AT4G16845	380	c42213.graph_c1	2023	4e-32	136	0	244	330	440	700	0.793	0.678
AT4G20370	175	c33920.graph_c0	862	3e-50	194	0	22	165	92	523	0.757	0.646
AT4G21200	338	c45057.graph_c0	1560	1e-114	407	0	2	334	321	1337	0.718	0.573
AT4G22140	234	c26222.graph_c0	1643	1e-104	375	0	1	216	273	896	0.903	0.806
AT4G23340	206	c20670.graph_c1	1433	1e-64	243	0	1	197	516	1094	0.787	0.558
AT4G24620	570	c21020.graph_c0	2428	0	905	0	67	569	548	2050	0.932	0.853
AT4G27060	864	c47900.graph_c0	3423	0	766	0	38	861	501	3038	0.658	0.506
AT4G27430	1058	c47719.graph_c0	4908	1e-161	567	0	1	1058	966	4484	0.503	0.368
AT4G29130	496	c46560.graph_c2	2589	0	717	0	25	495	630	2042	0.851	0.722
AT4G29830	321	c35414.graph_c0	1441	1e-137	484	0	1	321	196	1164	0.858	0.721
AT4G31120	642	c44490.graph_c0	2580	0	997	0	1	642	160	2100	0.843	0.737
AT4G31500	499	c49364.graph_c1	1829	1e-124	444	0	41	498	293	1648	0.668	0.461
AT4G33280	337	c49402.graph_c1	2774	4e-31	132	0	1	134	2219	2623	0.64	0.478
AT4G34530	335	c44072.graph_c0	3335	3e-51	199	0	68	330	1054	1896	0.541	0.42
AT4G35900	285	c22793.graph_c0	1429	2e-26	116	0	62	285	457	1134	0.476	0.378
AT4G37940	228	c45002.graph_c0	1834	2e-75	278	0	1	220	437	1108	0.78	0.617
AT5G03790	235	c51226.graph_c0	983	8e-35	144	0	78	221	300	728	0.688	0.514
AT5G10625	112	c40639.graph_c0	902	3e-42	167	0	1	111	470	805	0.813	0.732
AT5G14920	275	c25820.graph_c0	948	1e-20	97.4	0	215	275	475	657	0.787	0.721
AT5G19550	405	c40015.graph_c0	1912	0	716	0	1	403	511	1719	0.908	0.831
AT5G25810	218	c47367.graph_c1	1315	9e-40	160	0	28	196	445	909	0.6	0.529
AT5G25900	509	c27246.graph_c0	2014	0	644	0	33	508	354	1778	0.819	0.653
AT5G27320	344	c45499.graph_c0	2358	1e-153	538	0	1	339	652	1698	0.863	0.766
AT5G46210	792	c35896.graph_c0	3031	0	1235	0	24	792	301	2694	0.825	0.779
AT5G46910	787	c49548.graph_c2	3747	0	862	0	1	724	901	3135	0.72	0.589
AT5G47080	287	c36559.graph_c0	1773	1e-116	414	0	1	287	565	1422	0.766	0.711
AT5G47640	190	c40328.graph_c0	1520	1e-54	209	0	25	140	603	950	0.914	0.836
AT5G48150	490	c41382.graph_c0	2190	0	643	0	60	490	276	1574	0.829	0.714
AT5G51230	631	c45732.graph_c0	3999	1e-97	355	0	1	356	118	1188	0.652	0.508
AT5G51820	623	c37182.graph_c0	2426	0	989	0	64	623	379	2058	0.938	0.861
AT5G54510	612	c47104.graph_c0	2822	0	1010	0	38	609	510	2228	0.911	0.839
AT5G57660	355	c37627.graph_c0	1769	6e-69	258	0	7	355	445	1575	0.521	0.429
AT5G59710	614	c27683.graph_c0	2441	1e-171	599	0	36	611	220	1989	0.707	0.572
AT5G59845	89	c21073.graph_c0	1019	2e-21	98.2	0	1	89	656	919	0.64	0.584
AT5G61380	618	c47335.graph_c0	2498	1e-128	455	0	1	587	846	2432	0.575	0.456
AT5G64813	342	c21599.graph_c0	1735	1e-125	444	0	1	342	261	1271	0.761	0.671
AT5G65540	605	c47295.graph_c0	4424	1e-132	471	0	1	587	2607	4262	0.574	0.458
		c21020.graph_c0
		c21040.graph_c0
		c21073.graph_c0
		c21398.graph_c0
		c21599.graph_c0
		c22701.graph_c0
		c22793.graph_c0
		c25820.graph_c0
		c26222.graph_c0
		c27246.graph_c0
		c27683.graph_c0
		c29029.graph_c0
		c30865.graph_c0
		c33178.graph_c0
		c33289.graph_c0
		c33389.graph_c0
		c33920.graph_c0
		c35116.graph_c0
		c35414.graph_c0
		c35573.graph_c0
		c35653.graph_c0
		c35896.graph_c0
		c36421.graph_c0
		c36554.graph_c0
		c36559.graph_c0
		c37182.graph_c0
		c37481.graph_c0
		c37627.graph_c0
		c37771.graph_c0
		c38252.graph_c0
		c38474.graph_c0
		c39125.graph_c0
		c40015.graph_c0
		c40233.graph_c0
		c40328.graph_c0
		c40613.graph_c0
		c40639.graph_c0
		c40784.graph_c0
		c41013.graph_c0
		c41025.graph_c0
		c41382.graph_c0
		c41462.graph_c0
		c41590.graph_c0
		c41599.graph_c0
		c41780.graph_c0
		c41893.graph_c0
		c42213.graph_c1
		c42385.graph_c0
		c42470.graph_c0
		c42529.graph_c0
		c42923.graph_c0
		c43340.graph_c1
		c43351.graph_c0
		c43537.graph_c0
		c43776.graph_c1
		c44053.graph_c0
		c44072.graph_c0
		c44141.graph_c0
		c44239.graph_c0
		c44254.graph_c1
		c44490.graph_c0
		c44838.graph_c0
		c44864.graph_c1
		c45002.graph_c0
		c45057.graph_c0
		c45499.graph_c0
		c45534.graph_c0
		c45581.graph_c0
		c45732.graph_c0
		c45820.graph_c0
		c45908.graph_c1
		c46020.graph_c0
		c46257.graph_c0
		c46560.graph_c2
		c46619.graph_c0
		c46836.graph_c0
		c47104.graph_c0
		c47295.graph_c0
		c47335.graph_c0
		c47367.graph_c1
		c47719.graph_c0
		c47900.graph_c0
		c47943.graph_c1
		c47950.graph_c0
		c47978.graph_c1
		c47983.graph_c0
		c48138.graph_c0
		c48270.graph_c0
		c48521.graph_c1
		c48818.graph_c0
		c48966.graph_c1
		c49364.graph_c1
		c49402.graph_c1
		c49548.graph_c2
		c50228.graph_c0
		c51226.graph_c0
